# Supplementary material for: Effects of vegetarian diets on blood lipids, blood glucose, and blood pressure: a systematic review and meta-analysis
Source: Royal Society of Chemistry journal article supplement (doi:10.1039/d4fo03449j), 2024-01-01
Supplement: d4fo03449j1.pdf [file d4fo03449j1.pdf]

Appendix

Table A1. Subgroup analyses for the effects of the vegetarian diet on total cholesterol and total triglyceride (observational studies).

| Group                       | N  | TC, mmol/L |        |       |                 |                                                 |                            |                           | TG, mmol/L |       |        |        |                 |                                                 |                            |                           |
|-----------------------------|----|------------|--------|-------|-----------------|-------------------------------------------------|----------------------------|---------------------------|------------|-------|--------|--------|-----------------|-------------------------------------------------|----------------------------|---------------------------|
|                             |    | WMD        | 95% CI |       | <i>p</i> -value | <i>p</i> -value for between group heterogeneity | <i>p</i> for heterogeneity | <i>I</i> <sup>2</sup> (%) | N          | WMD   | 95% CI |        | <i>p</i> -value | <i>p</i> -value for between group heterogeneity | <i>p</i> for heterogeneity | <i>I</i> <sup>2</sup> (%) |
|                             |    |            | lower  | upper |                 |                                                 |                            |                           |            |       | lower  | upper  |                 |                                                 |                            |                           |
| Vegetarian type             |    |            |        |       |                 |                                                 |                            |                           |            |       |        |        |                 |                                                 |                            |                           |
| vegan                       | 18 | -0.48      | -0.57  | -0.39 | < 0.001         | 0.514                                           | < 0.001                    | 81.7%                     | 16         | 0.01  | -0.07  | 0.08   | 0.821           | 0.003                                           | 56.6%                      |                           |
| lacto                       | 6  | -0.53      | -0.97  | -0.10 | <b>0.016</b>    |                                                 | < 0.001                    | 91.9%                     | 6          | -0.02 | -0.18  | 0.15   | 0.838           |                                                 | 0.021                      | 62.5%                     |
| lacto-ovo                   | 20 | -0.52      | -0.63  | -0.41 | < 0.001         |                                                 | < 0.001                    | 64.8%                     | 20         | -0.15 | -0.26  | -0.04  | <b>0.008</b>    |                                                 | < 0.001                    | 74.1%                     |
| mixed                       | 11 | -0.66      | -0.88  | -0.44 | < 0.001         |                                                 | < 0.001                    | 79.9%                     | 11         | -0.27 | -0.50  | -0.03  | <b>0.026</b>    |                                                 | < 0.001                    | 90.3%                     |
| Duration of vegetarian diet |    |            |        |       |                 |                                                 |                            |                           |            |       |        |        |                 |                                                 |                            |                           |
| < 5 years                   | 19 | -0.48      | -0.61  | -0.35 | < 0.001         | 0.191                                           | < 0.001                    | 70.3%                     | 19         | 0.03  | -0.05  | 0.10   | 0.467           | 0.002                                           | 0.002                      | 54.6%                     |
| ≥ 5 years                   | 24 | -0.59      | -0.70  | -0.48 | < 0.001         |                                                 | < 0.001                    | 75.9%                     | 24         | -0.16 | -0.26  | -0.07  | <b>0.001</b>    |                                                 | < 0.001                    | 84.1%                     |
| Health status               |    |            |        |       |                 |                                                 |                            |                           |            |       |        |        |                 |                                                 |                            |                           |
| healthy                     | 49 | -0.58      | -0.66  | -0.50 | < 0.001         | 0.002                                           | < 0.001                    | 79.0%                     | 48         | -0.14 | -0.20  | -0.07  | < 0.001         | 0.002                                           | < 0.001                    | 80.2%                     |
| chronic diseases            | 6  | -0.40      | -0.48  | -0.31 | < 0.001         |                                                 | 0.147                      | 38.8%                     | 5          | 0.10  | -0.04  | 0.24   | 0.145           |                                                 | 0.175                      | 37.0%                     |
| Region                      |    |            |        |       |                 |                                                 |                            |                           |            |       |        |        |                 |                                                 |                            |                           |
| Asia                        | 35 | -0.49      | -0.58  | -0.41 | < 0.001         | 0.002                                           | < 0.001                    | 79.8%                     | 36         | -0.07 | -0.14  | -0.003 | <b>0.042</b>    | 0.160                                           | < 0.001                    | 81.7%                     |
| Africa                      | 1  | -0.80      | -1.24  | -0.36 | < 0.001         |                                                 | -                          | -                         | -          | -     | -      | -      | -               |                                                 | -                          | -                         |
| Europe                      | 10 | -0.44      | -0.54  | -0.34 | < 0.001         |                                                 | 0.198                      | 26.7%                     | 8          | -0.19 | -0.32  | -0.05  | <b>0.006</b>    |                                                 | 0.122                      | 38.6%                     |
| North America               | 4  | -0.73      | -0.98  | -0.48 | < 0.001         |                                                 | 0.663                      | 0                         | 4          | -0.18 | -0.40  | 0.03   | 0.096           |                                                 | 0.192                      | 36.7%                     |
| Oceania                     | 1  | -1.30      | -1.87  | -0.72 | < 0.001         |                                                 | -                          | -                         | 1          | -0.03 | -0.41  | 0.35   | 0.861           |                                                 | -                          | -                         |
| South America               | 4  | -1.07      | -1.56  | -0.58 | < 0.001         |                                                 | 0.002                      | 80.3%                     | 4          | -0.35 | -0.61  | -0.10  | <b>0.007</b>    |                                                 | 0.086                      | 54.6%                     |
| Research type               |    |            |        |       |                 |                                                 |                            |                           |            |       |        |        |                 |                                                 |                            |                           |
| case-control study          | 2  | -0.52      | -0.64  | -0.39 | < 0.001         | 0.206                                           | 0.323                      | 0                         | 2          | 0.28  | -0.38  | 0.94   | 0.407           | 0.384                                           | 0.053                      | 73.2%                     |
| cross-sectional study       | 45 | -0.53      | -0.61  | -0.44 | < 0.001         |                                                 | < 0.001                    | 77.7%                     | 44         | -0.13 | -0.22  | -0.05  | <b>0.001</b>    |                                                 | < 0.001                    | 73.4%                     |
| cohort study                | 8  | -0.73      | -0.94  | -0.51 | < 0.001         |                                                 | < 0.001                    | 87.1%                     | 7          | -0.08 | -0.20  | 0.05   | 0.222           |                                                 | 0.001                      | 79.2%                     |

Abbreviations: TC: total cholesterol; TG: triglyceride; WMD: weighted mean difference; mixed: vegan, lacto, lacto-ovo or a combination of two; We defined “vegan diet” as a diet which excludes the consumption of any meat, fish, seafood, eggs, and dairy, “lacto vegetarian diet” as a diet which excludes the consumption of any meat, fish, seafood, and eggs, and “lacto-ovo vegetarian diet” as a diet which excludes the consumption of any meat, fish, and seafood. The mixed diet was a combination of these vegetarian subtypes.

Table A2. Subgroup analyses for the effects of the vegetarian diet on total cholesterol and total triglyceride (randomized controlled trials).

| Group                       | N  | TC, mmol/L |        |       |                 |                                                 |                            |                           | TG, mmol/L |        |        |        |                 |                                                 |                            |                           |      |       |         |         |       |
|-----------------------------|----|------------|--------|-------|-----------------|-------------------------------------------------|----------------------------|---------------------------|------------|--------|--------|--------|-----------------|-------------------------------------------------|----------------------------|---------------------------|------|-------|---------|---------|-------|
|                             |    | WMD        | 95% CI |       | <i>p</i> -value | <i>p</i> -value for between group heterogeneity | <i>p</i> for heterogeneity | <i>I</i> <sup>2</sup> (%) | N          | WMD    | 95% CI |        | <i>p</i> -value | <i>p</i> -value for between group heterogeneity | <i>p</i> for heterogeneity | <i>I</i> <sup>2</sup> (%) |      |       |         |         |       |
|                             |    |            | lower  | upper |                 |                                                 |                            |                           |            |        | lower  | upper  |                 |                                                 |                            |                           |      |       |         |         |       |
| Vegetarian type             |    |            |        |       |                 |                                                 |                            |                           |            |        |        |        |                 |                                                 |                            |                           |      |       |         |         |       |
| vegan                       | 16 | -0.22      | -0.35  | -0.08 | <b>0.001</b>    | 0.190                                           | < 0.001                    | 78.3%                     | 16         | -0.001 | -0.10  | 0.10   | 0.984           | 0.900                                           | < 0.001                    | 76.7%                     |      |       |         |         |       |
| lacto-ovo                   | 1  | -0.52      | -0.95  | -0.09 | <b>0.018</b>    |                                                 |                            |                           | -          | -      | 1      | -0.02  | -0.23           |                                                 |                            |                           | 0.20 | 0.882 | -       | -       |       |
| Duration of vegetarian diet |    |            |        |       |                 |                                                 |                            |                           |            |        |        |        |                 |                                                 |                            |                           |      |       |         |         |       |
| < 12 weeks                  | 3  | -0.33      | -0.63  | -0.02 | <b>0.038</b>    | 0.563                                           | 0.364                      | 0.9%                      | 2          | -0.02  | -0.20  | 0.17   | 0.876           | 0.895                                           | 0.983                      | 0                         |      |       |         |         |       |
| ≥ 12 weeks                  | 14 | -0.23      | -0.37  | -0.09 | <b>0.002</b>    |                                                 |                            |                           | < 0.001    | 81.0%  | 15     | -0.001 | -0.10           |                                                 |                            |                           | 0.10 | 0.991 | < 0.001 | 78.3%   |       |
| Health status               |    |            |        |       |                 |                                                 |                            |                           |            |        |        |        |                 |                                                 |                            |                           |      |       |         |         |       |
| healthy                     | 2  | -0.53      | -0.82  | -0.24 | < <b>0.001</b>  | 0.041                                           | 0.942                      | 0                         | 2          | 0.08   | -0.11  | 0.27   | 0.422           | 0.398                                           | 0.210                      | 36.4%                     |      |       |         |         |       |
| chronic diseases            | 15 | -0.19      | -0.33  | -0.06 | <b>0.005</b>    |                                                 |                            |                           | < 0.001    | 77.4%  | 15     | -0.02  | -0.12           |                                                 |                            |                           | 0.09 | 0.771 | < 0.001 | 77.4%   |       |
| Region                      |    |            |        |       |                 |                                                 |                            |                           |            |        |        |        |                 |                                                 |                            |                           |      |       |         |         |       |
| Asia                        | 1  | < 0.001    | -0.57  | 0.57  | 1.000           | 0.071                                           | -                          | -                         | -          | -      | -      | -      | -               | -                                               | -                          | -                         |      |       |         |         |       |
| Europe                      | 3  | -0.71      | -1.16  | -0.25 | <b>0.002</b>    |                                                 |                            |                           | 0.276      | 22.4%  | 4      | -0.07  | -0.22           |                                                 |                            |                           | 0.08 | 0.362 | 0.936   | 0       |       |
| North America               | 12 | -0.17      | -0.31  | -0.04 | <b>0.014</b>    |                                                 |                            |                           | < 0.001    | 78.7%  | 12     | -0.004 | -0.12           |                                                 |                            |                           | 0.11 | 0.945 | 0.121   | < 0.001 | 81.6% |
| Oceania                     | 1  | -0.40      | -0.68  | -0.12 | <b>0.004</b>    |                                                 |                            |                           | -          | -      | 1      | 0.20   | -0.01           |                                                 |                            |                           | 0.41 | 0.064 | -       | -       |       |
| Research type               |    |            |        |       |                 |                                                 |                            |                           |            |        |        |        |                 |                                                 |                            |                           |      |       |         |         |       |
| parallel design             | 13 | -0.21      | -0.35  | -0.06 | <b>0.005</b>    | 0.299                                           | < 0.001                    | 80.3%                     | 14         | -0.04  | -0.14  | 0.07   | 0.489           | 0.097                                           | < 0.001                    | 77.4%                     |      |       |         |         |       |
| cross-over design           | 4  | -0.35      | -0.59  | -0.17 | <b>0.003</b>    |                                                 |                            |                           | 0.330      | 12.4%  | 3      | 0.14   | -0.04           |                                                 |                            |                           | 0.32 | 0.129 | 0.177   | 42.2%   |       |

Abbreviations: TC: total cholesterol; TG: triglyceride; WMD: weighted mean difference; We defined “vegan diet” as a diet which excludes the consumption of any meat, fish, seafood, eggs, and dairy, and “lacto-ovo vegetarian diet” as a diet which excludes the consumption of any meat, fish, and seafood.

Table A3. Subgroup analyses for the effects of the vegetarian diet on low-density lipoprotein and high-density lipoprotein (observational studies).

| Group                              | N  | LDL-C, mmol/L |        |       |                 |                                                 |                            |                           | HDL-C, mmol/L |       |        |       |                 |                                                 |                            |                           |
|------------------------------------|----|---------------|--------|-------|-----------------|-------------------------------------------------|----------------------------|---------------------------|---------------|-------|--------|-------|-----------------|-------------------------------------------------|----------------------------|---------------------------|
|                                    |    | WMD           | 95% CI |       | <i>p</i> -value | <i>p</i> -value for between group heterogeneity | <i>p</i> for heterogeneity | <i>I</i> <sup>2</sup> (%) | N             | WMD   | 95% CI |       | <i>p</i> -value | <i>p</i> -value for between group heterogeneity | <i>p</i> for heterogeneity | <i>I</i> <sup>2</sup> (%) |
|                                    |    |               | lower  | upper |                 |                                                 |                            |                           |               |       | lower  | upper |                 |                                                 |                            |                           |
| <b>Vegetarian type</b>             |    |               |        |       |                 |                                                 |                            |                           |               |       |        |       |                 |                                                 |                            |                           |
| vegan                              | 13 | -0.37         | -0.54  | -0.20 | < 0.001         | 0.875                                           | < 0.001                    | 84.5%                     | 14            | -0.08 | -0.11  | -0.05 | < 0.001         | 0.548                                           | 0.120                      | 31.9%                     |
| lacto                              | 6  | -0.50         | -0.88  | -0.12 | 0.009           |                                                 | < 0.001                    | 91.0%                     | 6             | -0.09 | -0.12  | -0.06 | < 0.001         |                                                 | 0.543                      | 0                         |
| lacto-ovo                          | 16 | -0.41         | -0.51  | -0.30 | < 0.001         |                                                 | 0.004                      | 55.0%                     | 20            | -0.06 | -0.09  | -0.03 | < 0.001         |                                                 | < 0.001                    | 67.6%                     |
| mixed                              | 9  | -0.46         | -0.65  | -0.26 | < 0.001         |                                                 | < 0.001                    | 82.1%                     | 9             | -0.06 | -0.13  | 0.003 | 0.061           |                                                 | < 0.001                    | 74.5%                     |
| <b>Duration of vegetarian diet</b> |    |               |        |       |                 |                                                 |                            |                           |               |       |        |       |                 |                                                 |                            |                           |
| < 5 years                          | 16 | -0.33         | -0.46  | -0.19 | < 0.001         | 0.139                                           | < 0.001                    | 78.1%                     | 19            | -0.07 | -0.10  | -0.04 | < 0.001         | 0.703                                           | < 0.001                    | 63.0%                     |
| ≥ 5 years                          | 21 | -0.45         | -0.53  | -0.36 | < 0.001         |                                                 | < 0.001                    | 66.6%                     | 21            | -0.08 | -0.11  | -0.05 | < 0.001         |                                                 | 0.001                      | 57.6%                     |
| <b>Health status</b>               |    |               |        |       |                 |                                                 |                            |                           |               |       |        |       |                 |                                                 |                            |                           |
| healthy                            | 40 | -0.44         | -0.52  | -0.36 | < 0.001         | 0.037                                           | < 0.001                    | 79.8%                     | 45            | -0.06 | -0.08  | -0.05 | < 0.001         | 0.076                                           | < 0.001                    | 59.2%                     |
| chronic diseases                   | 4  | -0.18         | -0.41  | 0.04  | 0.113           |                                                 | 0.002                      | 80.4%                     | 4             | -0.15 | -0.23  | -0.06 | 0.001           |                                                 | 0.081                      | 55.5%                     |
| <b>Region</b>                      |    |               |        |       |                 |                                                 |                            |                           |               |       |        |       |                 |                                                 |                            |                           |
| Asia                               | 27 | -0.34         | -0.42  | -0.26 | < 0.001         | 0.019                                           | < 0.001                    | 84.5%                     | 28            | -0.10 | -0.12  | -0.08 | < 0.001         | < 0.001                                         | 0.008                      | 43.7%                     |
| Europe                             | 8  | -0.39         | -0.57  | -0.20 | < 0.001         |                                                 | 0.155                      | 34.2%                     | 12            | -0.02 | -0.05  | 0.01  | 0.198           |                                                 | 0.016                      | 52.8%                     |
| North America                      | 4  | -0.58         | -0.80  | -0.35 | < 0.001         |                                                 | 0.626                      | 0                         | 4             | -0.08 | -0.23  | 0.06  | 0.260           |                                                 | 0.080                      | 55.5%                     |
| Oceania                            | 1  | -0.93         | -1.64  | -0.23 | 0.010           |                                                 | -                          | -                         | 1             | -0.10 | -0.28  | 0.07  | 0.241           |                                                 | -                          | -                         |
| South America                      | 4  | -0.89         | -1.31  | -0.47 | < 0.001         |                                                 | 0.004                      | 77.7%                     | 4             | -0.01 | -0.07  | 0.05  | 0.722           |                                                 | 0.411                      | 0                         |
| <b>Research type</b>               |    |               |        |       |                 |                                                 |                            |                           |               |       |        |       |                 |                                                 |                            |                           |
| case-control study                 | 2  | -0.34         | -0.59  | -0.08 | 0.009           | 0.024                                           | 0.150                      | 51.8%                     | 2             | -0.10 | -0.15  | -0.05 | < 0.001         | 0.499                                           | 0.925                      | 0                         |
| cross-sectional study              | 36 | -0.37         | -0.45  | -0.28 | < 0.001         |                                                 | < 0.001                    | 73.2%                     | 40            | -0.07 | -0.09  | -0.04 | < 0.001         |                                                 | < 0.001                    | 63.4%                     |
| cohort study                       | 6  | -0.80         | -1.11  | -0.50 | < 0.001         |                                                 | < 0.001                    | 90.4%                     | 7             | -0.08 | -0.11  | -0.04 | < 0.001         |                                                 | 0.083                      | 46.3%                     |

Abbreviations: LDL-C: low-density lipoprotein-cholesterol; HDL-C: high-density lipoprotein-cholesterol; WMD: weighted mean difference; mixed: vegan, lacto, lacto-ovo or a combination of two; We defined “vegan diet” as a diet which excludes the consumption of any meat, fish, seafood, eggs, and dairy, “lacto vegetarian diet” as a diet which excludes the consumption of any meat, fish, seafood, and eggs, and “lacto-ovo vegetarian diet” as a diet which excludes the consumption of any meat, fish, and seafood. The mixed diet was a combination of these vegetarian subtypes.

Table A4. Subgroup analyses for the effects of the vegetarian diet on low-density lipoprotein and high-density lipoprotein (randomized controlled trials).

|                             |    | LDL-C, mmol/L |        |       |                   |                                         |                     |                    |         | HDL-C, mmol/L |        |       |                   |                                         |                     |                    |       |                   |         |       |
|-----------------------------|----|---------------|--------|-------|-------------------|-----------------------------------------|---------------------|--------------------|---------|---------------|--------|-------|-------------------|-----------------------------------------|---------------------|--------------------|-------|-------------------|---------|-------|
| Group                       | N  | WMD           | 95% CI |       | p-value           | p-value for between group heterogeneity | p for heterogeneity | I <sup>2</sup> (%) | N       | WMD           | 95% CI |       | p-value           | p-value for between group heterogeneity | p for heterogeneity | I <sup>2</sup> (%) |       |                   |         |       |
|                             |    |               | lower  | upper |                   |                                         |                     |                    |         |               | lower  | upper |                   |                                         |                     |                    |       |                   |         |       |
| Vegetarian type             |    |               |        |       |                   |                                         |                     |                    |         |               |        |       |                   |                                         |                     |                    |       |                   |         |       |
| vegan                       | 14 | -0.24         | -0.38  | -0.10 | <b>&lt; 0.001</b> | 0.401                                   | < 0.001             | 70.9%              | 17      | -0.07         | -0.11  | -0.04 | <b>&lt; 0.001</b> | 0.749                                   | < 0.001             | 70.5%              |       |                   |         |       |
| lacto-ovo                   | 1  | -0.41         | -0.80  | -0.03 | <b>0.034</b>      |                                         |                     |                    | -       | -             | 1      | -0.10 | -0.23             |                                         |                     |                    | 0.04  | 0.169             | -       | -     |
| Duration of vegetarian diet |    |               |        |       |                   |                                         |                     |                    |         |               |        |       |                   |                                         |                     |                    |       |                   |         |       |
| < 12 weeks                  | 2  | -0.39         | -0.72  | -0.06 | <b>0.021</b>      | 0.416                                   | 0.787               | 0                  | 3       | -0.04         | -0.16  | 0.09  | 0.546             | 0.555                                   | 0.297               | 17.6%              |       |                   |         |       |
| ≥ 12 weeks                  | 13 | -0.24         | -0.38  | -0.10 | <b>0.001</b>      |                                         |                     |                    | < 0.001 | 72.9%         | 15     | -0.08 | -0.12             |                                         |                     |                    | -0.04 | <b>&lt; 0.001</b> | < 0.001 | 73.4% |
| Health status               |    |               |        |       |                   |                                         |                     |                    |         |               |        |       |                   |                                         |                     |                    |       |                   |         |       |
| healthy                     | 2  | -0.35         | -0.59  | -0.10 | <b>0.006</b>      | 0.446                                   | 0.655               | 0                  | 2       | -0.14         | -0.24  | -0.04 | <b>0.007</b>      | 0.182                                   | 0.325               | 0                  |       |                   |         |       |
| chronic diseases            | 13 | -0.24         | -0.38  | -0.10 | <b>0.001</b>      |                                         |                     |                    | < 0.001 | 72.1%         | 16     | -0.07 | -0.11             |                                         |                     |                    | -0.03 | <b>0.001</b>      | < 0.001 | 69.8% |
| Region                      |    |               |        |       |                   |                                         |                     |                    |         |               |        |       |                   |                                         |                     |                    |       |                   |         |       |
| Asia                        | -  | -             | -      | -     | -                 | 0.143                                   | -                   | -                  | 1       | 0.10          | -0.11  | 0.31  | 0.353             | 0.004                                   | -                   | -                  |       |                   |         |       |
| Europe                      | 4  | -0.51         | -0.98  | 0.04  | <b>0.035</b>      |                                         |                     |                    | 0.035   | 65.2%         | 4      | -0.07 | -0.18             |                                         |                     |                    | 0.04  | 0.196             | 0.309   | 16.5% |
| North America               | 10 | -0.18         | -0.31  | -0.05 | <b>0.006</b>      |                                         |                     |                    | 0.003   | 63.8%         | 12     | -0.06 | -0.10             |                                         |                     |                    | -0.03 | <b>0.001</b>      | < 0.001 | 64.0% |
| Oceania                     | 1  | -0.40         | -0.63  | -0.17 | <b>0.001</b>      |                                         |                     |                    | -       | -             | 1      | -0.20 | -0.28             |                                         |                     |                    | -0.12 | <b>&lt; 0.001</b> | -       | -     |
| Research type               |    |               |        |       |                   |                                         |                     |                    |         |               |        |       |                   |                                         |                     |                    |       |                   |         |       |
| parallel design             | 12 | -0.23         | -0.39  | -0.08 | <b>0.003</b>      | 0.438                                   | < 0.001             | 72.9%              | 14      | -0.07         | -0.11  | -0.03 | <b>&lt; 0.001</b> | 0.589                                   | < 0.001             | 70.4%              |       |                   |         |       |
| cross-over design           | 3  | -0.33         | -0.51  | -0.14 | <b>&lt; 0.001</b> |                                         |                     |                    | 0.876   | 0             | 4      | -0.09 | -0.18             |                                         |                     |                    | -0.01 | <b>0.029</b>      | 0.169   | 40.5% |

Abbreviations: LDL-C: low-density lipoprotein-cholesterol; HDL-C: high-density lipoprotein-cholesterol; WMD: weighted mean difference; We defined “vegan diet” as a diet which excludes the consumption of any meat, fish, seafood, eggs, and dairy, and “lacto-ovo vegetarian diet” as a diet which excludes the consumption of any meat, fish, and seafood.

Table A5. Subgroup analyses for the effects of the vegetarian diet on fasting blood glucose (observational studies).

| Group                       | N  | WMD   | fasting blood glucose, mmol/L |       |                |       | <i>p</i> -value | <i>p</i> -value for between group heterogeneity | <i>p</i> for heterogeneity | <i>I</i> <sup>2</sup> (%) |
|-----------------------------|----|-------|-------------------------------|-------|----------------|-------|-----------------|-------------------------------------------------|----------------------------|---------------------------|
|                             |    |       | 95% CI                        |       |                |       |                 |                                                 |                            |                           |
|                             |    |       | lower                         | upper |                |       |                 |                                                 |                            |                           |
| Vegetarian type             |    |       |                               |       |                |       |                 |                                                 |                            |                           |
| vegan                       | 13 | -0.19 | -0.34                         | -0.04 | <b>0.015</b>   | 0.304 | 0.002           | 62.0%                                           |                            |                           |
| lacto                       | 2  | -0.18 | -0.49                         | 0.14  | 0.277          |       | 0.002           | 89.3%                                           |                            |                           |
| lacto-ovo                   | 10 | -0.25 | -0.34                         | -0.16 | < <b>0.001</b> |       | 0.048           | 47.1%                                           |                            |                           |
| mixed                       | 6  | -0.44 | -0.66                         | -0.22 | < <b>0.001</b> |       | < 0.001         | 89.2%                                           |                            |                           |
| Duration of vegetarian diet |    |       |                               |       |                |       |                 |                                                 |                            |                           |
| < 5 years                   | 14 | -0.19 | -0.30                         | -0.07 | <b>0.001</b>   | 0.037 | 0.001           | 63.2%                                           |                            |                           |
| ≥ 5 years                   | 13 | -0.36 | -0.48                         | -0.24 | < <b>0.001</b> |       | < 0.001         | 85.2%                                           |                            |                           |
| Health status               |    |       |                               |       |                |       |                 |                                                 |                            |                           |
| healthy                     | 28 | -0.26 | -0.33                         | -0.18 | < <b>0.001</b> | 0.501 | < 0.001         | 77.2%                                           |                            |                           |
| chronic diseases            | 3  | -0.37 | -0.70                         | -0.05 | <b>0.025</b>   |       | 0.049           | 66.9%                                           |                            |                           |
| Region                      |    |       |                               |       |                |       |                 |                                                 |                            |                           |
| Asia                        | 21 | -0.19 | -0.25                         | -0.13 | < <b>0.001</b> | 0.052 | < 0.001         | 63.1%                                           |                            |                           |
| Africa                      | 1  | -0.40 | -2.21                         | 1.41  | 0.664          |       | -               | -                                               |                            |                           |
| Europe                      | 3  | -0.20 | -0.72                         | 0.33  | 0.460          |       | 0.129           | 51.2%                                           |                            |                           |
| North America               | 3  | -0.45 | -0.69                         | -0.21 | < <b>0.001</b> |       | 0.992           | 0                                               |                            |                           |
| South America               | 3  | -0.89 | -1.49                         | -0.29 | <b>0.004</b>   |       | < 0.001         | 89.5%                                           |                            |                           |
| Research type               |    |       |                               |       |                |       |                 |                                                 |                            |                           |
| case-control study          | 1  | -0.17 | -0.31                         | -0.03 | <b>0.016</b>   | 0.217 | -               | -                                               |                            |                           |
| cross-sectional study       | 26 | -0.25 | -0.33                         | -0.17 | < <b>0.001</b> |       | < 0.001         | 62.9%                                           |                            |                           |
| cohort study                | 4  | -0.46 | -0.76                         | -0.16 | <b>0.003</b>   |       | < 0.001         | 93.8%                                           |                            |                           |

Abbreviations: WMD: weighted mean difference; mixed: vegan, lacto, lacto-ovo or a combination of two; We defined “vegan diet” as a diet which excludes the consumption of any meat, fish, seafood, eggs, and dairy, “lacto vegetarian diet” as a diet which excludes the consumption of any meat, fish, seafood, and eggs, and “lacto-ovo vegetarian diet” as a diet which excludes the consumption of any meat, fish, and seafood. The mixed diet was a combination of these vegetarian subtypes.

Table A6. Subgroup analyses for the effects of the vegetarian diet on fasting blood glucose (randomized controlled trials).

|                             |                   | fasting blood glucose, mmol/L |       |        |       |                 |                                                 |                            |                           |
|-----------------------------|-------------------|-------------------------------|-------|--------|-------|-----------------|-------------------------------------------------|----------------------------|---------------------------|
| Group                       |                   | N                             | WMD   | 95% CI |       | <i>p</i> -value | <i>p</i> -value for between group heterogeneity | <i>p</i> for heterogeneity | <i>I</i> <sup>2</sup> (%) |
|                             |                   |                               |       | lower  | upper |                 |                                                 |                            |                           |
| Vegetarian type             |                   |                               |       |        |       |                 |                                                 |                            |                           |
|                             | vegan             | 9                             | -0.36 | -0.49  | -0.24 | < <b>0.001</b>  | 0.265                                           | 0.354                      | 9.7%                      |
|                             | lacto-ovo         | 2                             | -0.18 | -0.47  | 0.11  | 0.222           |                                                 | 0.427                      | 0                         |
| Duration of vegetarian diet |                   |                               |       |        |       |                 |                                                 |                            |                           |
|                             | < 12 weeks        | 3                             | -0.21 | -0.46  | 0.05  | 0.115           |                                                 | 0.687                      | 0                         |
|                             | ≥ 12 weeks        | 8                             | -0.35 | -0.50  | -0.21 | < <b>0.001</b>  | 0.324                                           | 0.271                      | 20.1%                     |
| Health status               |                   |                               |       |        |       |                 |                                                 |                            |                           |
|                             | healthy           | 2                             | -0.18 | -0.47  | 0.11  | 0.222           |                                                 | 0.427                      | 0                         |
|                             | chronic diseases  | 9                             | -0.36 | -0.49  | -0.24 | < <b>0.001</b>  | 0.265                                           | 0.354                      | 9.7%                      |
| Region                      |                   |                               |       |        |       |                 |                                                 |                            |                           |
|                             | Europe            | 2                             | -0.03 | -0.51  | 0.45  | 0.908           |                                                 | 0.183                      | 43.6%                     |
|                             | North America     | 8                             | -0.38 | -0.48  | -0.28 | < <b>0.001</b>  | 0.352                                           | 0.605                      | 0                         |
|                             | Oceania           | 1                             | -0.52 | -1.41  | 0.37  | 0.250           |                                                 | -                          | -                         |
| Research type               |                   |                               |       |        |       |                 |                                                 |                            |                           |
|                             | parallel design   | 9                             | -0.36 | -0.50  | -0.22 | < <b>0.001</b>  |                                                 | 0.346                      | 10.6%                     |
|                             | cross-over design | 2                             | -0.24 | -0.47  | -0.01 | <b>0.045</b>    | 0.362                                           | 0.355                      | 0                         |

Abbreviations: WMD: weighted mean difference; We defined “vegan diet” as a diet which excludes the consumption of any meat, fish, seafood, eggs, and dairy, and “lacto-ovo vegetarian diet” as a diet which excludes the consumption of any meat, fish, and seafood.

Table A7. Subgroup analyses for the effects of the vegetarian diet on HbA1c (observational studies).

| Group                       | N | WMD   | 95% CI |       | HbA1c, %        |                                                 | <i>p</i> for heterogeneity | <i>I</i> <sup>2</sup> (%) |  |
|-----------------------------|---|-------|--------|-------|-----------------|-------------------------------------------------|----------------------------|---------------------------|--|
|                             |   |       | lower  | upper | <i>p</i> -value | <i>p</i> -value for between group heterogeneity |                            |                           |  |
| Vegetarian type             |   |       |        |       |                 |                                                 |                            |                           |  |
| vegan                       | 1 | 0.15  | -0.41  | 0.71  | 0.598           |                                                 | -                          | -                         |  |
| lacto                       | 1 | 0.10  | 0.004  | 0.20  | <b>0.040</b>    |                                                 | -                          | -                         |  |
| lacto-ovo                   | 1 | -0.30 | -0.71  | 0.11  | 0.151           | 0.052                                           | -                          | -                         |  |
| mixed                       | 3 | -0.13 | -0.30  | 0.05  | 0.160           |                                                 | 0.054                      | 65.7%                     |  |
| Duration of vegetarian diet |   |       |        |       |                 |                                                 |                            |                           |  |
| < 5 years                   | 4 | -0.21 | -0.31  | -0.10 | < <b>0.001</b>  | 0.017                                           | 0.613                      | 0                         |  |
| ≥ 5 years                   | 1 | 0.10  | -0.13  | 0.33  | 0.392           |                                                 | -                          | -                         |  |
| Health status               |   |       |        |       |                 |                                                 |                            |                           |  |
| healthy                     | 4 | -0.07 | -0.29  | 0.14  | 0.491           | 0.959                                           | < 0.001                    | 83.5%                     |  |
| chronic diseases            | 2 | -0.06 | -0.45  | 0.32  | 0.750           |                                                 | 0.094                      | 64.2%                     |  |
| Region                      |   |       |        |       |                 |                                                 |                            |                           |  |
| Asia                        | 3 | 0.05  | -0.11  | 0.21  | 0.550           |                                                 | 0.173                      | 43.0%                     |  |
| Europe                      | 1 | 0.15  | -0.41  | 0.71  | 0.598           | 0.048                                           | -                          | -                         |  |
| North America               | 1 | -0.22 | -0.36  | -0.08 | <b>0.002</b>    |                                                 | -                          | -                         |  |
| South America               | 1 | -0.20 | -0.37  | -0.03 | <b>0.023</b>    |                                                 | -                          | -                         |  |

Abbreviations: HbA1c: glycosylated hemoglobin; WMD: weighted mean difference; mixed: vegan, lacto, lacto-ovo or a combination of two; We defined “vegan diet” as a diet which excludes the consumption of any meat, fish, seafood, eggs, and dairy, “lacto vegetarian diet” as a diet which excludes the consumption of any meat, fish, seafood, and eggs, and “lacto-ovo vegetarian diet” as a diet which excludes the consumption of any meat, fish, and seafood. The mixed diet was a combination of these vegetarian subtypes.

Table A8. Subgroup analyses for the effects of the vegetarian diet on HbA1c (randomized controlled trials).

| Group                       | N      | WMD          | HbA1c, %    |       |              |       | <i>p</i> -value | <i>p</i> -value for between group heterogeneity | <i>p</i> for heterogeneity | <i>I</i> <sup>2</sup> (%) |
|-----------------------------|--------|--------------|-------------|-------|--------------|-------|-----------------|-------------------------------------------------|----------------------------|---------------------------|
|                             |        |              | 95% CI      |       |              |       |                 |                                                 |                            |                           |
|                             |        |              | lower       | upper |              |       |                 |                                                 |                            |                           |
| Duration of vegetarian diet |        |              |             |       |              |       |                 |                                                 |                            |                           |
| < 12 weeks                  | 3      | -0.18        | -0.90       | 0.55  | 0.639        | 0.940 | 0.973           | 0                                               |                            |                           |
| ≥ 12 weeks                  | 9      | -0.15        | -0.28       | -0.01 | <b>0.034</b> |       |                 |                                                 | 21.2%                      |                           |
| Region                      |        |              |             |       |              |       |                 |                                                 |                            |                           |
| Asia                        | 1      | -0.10        | -1.10       | 0.90  | 0.845        | 0.969 | -               | -                                               |                            |                           |
| Europe                      | 3      | -0.20        | -1.01       | 0.60  | 0.619        |       | 0.984           | 0                                               |                            |                           |
| North America               | 7      | -0.17        | -0.33       | -0.01 | <b>0.043</b> |       | 0.133           | 38.8%                                           |                            |                           |
| Oceania                     | 1      | -0.45        | -1.62       | 0.72  | 0.450        |       | -               | -                                               |                            |                           |
| Research type               |        |              |             |       |              |       |                 |                                                 |                            |                           |
| parallel design             | 9      | -0.23        | -0.44       | -0.01 | <b>0.041</b> | 0.424 | 0.263           | 20.3%                                           |                            |                           |
| cross-over design           | 3      | -0.12        | -0.26       | 0.02  | 0.083        |       | 0.967           | 0                                               |                            |                           |
| Abbreviations:              | HbA1c: | glycosylated | hemoglobin; | WMD:  | weighted     | mean  | difference.     |                                                 |                            |                           |



Table A9. Subgroup analyses for the effects of the vegetarian diet on blood pressure (observational studies).

| Group                       | N  | SBP, mmHg |        |       |                 |                                                 |                            |                           | DBP, mmHg |        |        |       |                 |                                                 |                            |                           |
|-----------------------------|----|-----------|--------|-------|-----------------|-------------------------------------------------|----------------------------|---------------------------|-----------|--------|--------|-------|-----------------|-------------------------------------------------|----------------------------|---------------------------|
|                             |    | WMD       | 95% CI |       | <i>p</i> -value | <i>p</i> -value for between group heterogeneity | <i>p</i> for heterogeneity | <i>I</i> <sup>2</sup> (%) | N         | WMD    | 95% CI |       | <i>p</i> -value | <i>p</i> -value for between group heterogeneity | <i>p</i> for heterogeneity | <i>I</i> <sup>2</sup> (%) |
|                             |    |           | lower  | upper |                 |                                                 |                            |                           |           |        | lower  | upper |                 |                                                 |                            |                           |
| Vegetarian type             |    |           |        |       |                 |                                                 |                            |                           |           |        |        |       |                 |                                                 |                            |                           |
| vegan                       | 13 | -0.83     | -2.55  | 0.89  | 0.346           | 0.008                                           | < 0.001                    | 83.9%                     | 12        | -0.60  | -1.46  | 0.27  | 0.175           | 0.011                                           | < 0.001                    | 72.2%                     |
| lacto                       | 6  | -5.31     | -10.38 | -0.24 | <b>0.040</b>    |                                                 | < 0.001                    | 85.9%                     | 6         | -2.83  | -6.73  | 1.07  | 0.155           |                                                 | < 0.001                    | 87.2%                     |
| lacto-ovo                   | 15 | -6.11     | -9.21  | -3.01 | < <b>0.001</b>  |                                                 | < 0.001                    | 85.6%                     | 15        | -3.90  | -6.04  | -1.77 | < <b>0.001</b>  |                                                 | < 0.001                    | 88.0%                     |
| mixed                       | 8  | -5.87     | -10.83 | -0.91 | <b>0.020</b>    |                                                 | < 0.001                    | 88.9%                     | 7         | -4.66  | -9.03  | -0.30 | <b>0.036</b>    |                                                 | < 0.001                    | 92.9%                     |
| Duration of vegetarian diet |    |           |        |       |                 |                                                 |                            |                           |           |        |        |       |                 |                                                 |                            |                           |
| < 5 years                   | 15 | -3.66     | -6.59  | -0.73 | <b>0.014</b>    | 0.608                                           | < 0.001                    | 77.8%                     | 14        | -1.61  | -3.42  | 0.19  | 0.080           | 0.222                                           | < 0.001                    | 77.2%                     |
| ≥ 5 years                   | 18 | -4.69     | -7.31  | -2.07 | < <b>0.001</b>  |                                                 | < 0.001                    | 88.7%                     | 17        | -3.23  | -5.10  | -1.36 | <b>0.001</b>    |                                                 | < 0.001                    | 90.5%                     |
| Health status               |    |           |        |       |                 |                                                 |                            |                           |           |        |        |       |                 |                                                 |                            |                           |
| healthy                     | 37 | -4.72     | -6.43  | -3.01 | < <b>0.001</b>  | 0.050                                           | < 0.001                    | 85.6%                     | 35        | -3.22  | -4.40  | -2.03 | < <b>0.001</b>  | 0.005                                           | < 0.001                    | 87.5%                     |
| chronic diseases            | 5  | -1.76     | -4.18  | 0.66  | 0.153           |                                                 | 0.015                      | 67.4%                     | 5         | 0.15   | -1.89  | 2.20  | 0.884           |                                                 | < 0.001                    | 81.6%                     |
| Region                      |    |           |        |       |                 |                                                 |                            |                           |           |        |        |       |                 |                                                 |                            |                           |
| Asia                        | 27 | -3.79     | -5.30  | -2.27 | < <b>0.001</b>  | 0.253                                           | < 0.001                    | 89.7%                     | 27        | -2.37  | -3.28  | -1.46 | < <b>0.001</b>  | 0.001                                           | < 0.001                    | 87.1%                     |
| Africa                      | 2  | -1.70     | -5.66  | 2.26  | 0.401           |                                                 | 1.000                      | -                         | 2         | 1.90   | -1.16  | 4.96  | 0.223           |                                                 | 1.000                      | -                         |
| Europe                      | 4  | -3.40     | -6.91  | 0.11  | 0.058           |                                                 | 0.238                      | 29.1%                     | 3         | -0.87  | -2.27  | 0.53  | 0.221           |                                                 | 0.603                      | 0                         |
| North America               | 7  | -4.05     | -7.27  | -0.84 | <b>0.013</b>    |                                                 | 0.111                      | 42.0%                     | 6         | -2.26  | -4.78  | 0.25  | 0.078           |                                                 | 0.036                      | 57.9%                     |
| South America               | 2  | -15.40    | -26.47 | -4.33 | <b>0.006</b>    |                                                 | 0.003                      | 88.9%                     | 2         | -11.96 | -18.13 | -5.79 | < <b>0.001</b>  |                                                 | 0.016                      | 82.6%                     |
| Research type               |    |           |        |       |                 |                                                 |                            |                           |           |        |        |       |                 |                                                 |                            |                           |
| case-control study          | 2  | -4.15     | -6.97  | -1.34 | <b>0.004</b>    | 0.586                                           | 0.700                      | 0                         | 2         | -0.63  | -2.26  | 1.00  | 0.450           | 0.078                                           | 0.483                      | 0                         |
| cross-sectional study       | 33 | -3.98     | -5.80  | -2.15 | < <b>0.001</b>  |                                                 | < 0.001                    | 86.5%                     | 31        | -2.69  | -3.93  | -1.45 | < <b>0.001</b>  |                                                 | < 0.001                    | 86.3%                     |
| cohort study                | 7  | -6.48     | -10.90 | -2.07 | <b>0.004</b>    |                                                 | < 0.001                    | 91.4%                     | 7         | -3.58  | -6.37  | -0.80 | <b>0.012</b>    |                                                 | < 0.001                    | 91.7%                     |

Abbreviations: SBP: systolic blood pressure; DBP: diastolic blood pressure; WMD: weighted mean difference; mixed: vegan, lacto, lacto-ovo or a combination of two; We defined “vegan diet” as a diet which excludes the consumption of any meat, fish, seafood, eggs, and dairy, “lacto vegetarian diet” as a diet which excludes the consumption of any meat, fish, seafood, and eggs, and “lacto-ovo vegetarian diet” as a diet which excludes the consumption of any meat, fish, and seafood. The mixed diet was a combination of these vegetarian subtypes.

Table A10. Subgroup analyses for the effects of the vegetarian diet on blood pressure (randomized controlled trials).

|                             |                   | SBP, mmHg |          |        |                 |                                                 |                            |                           |           | DBP, mmHg |          |       |                 |                                                 |                            |                           |       |
|-----------------------------|-------------------|-----------|----------|--------|-----------------|-------------------------------------------------|----------------------------|---------------------------|-----------|-----------|----------|-------|-----------------|-------------------------------------------------|----------------------------|---------------------------|-------|
| Group                       | N                 | WMD       | 95% CI   |        | <i>p</i> -value | <i>p</i> -value for between group heterogeneity | <i>p</i> for heterogeneity | <i>I</i> <sup>2</sup> (%) | N         | WMD       | 95% CI   |       | <i>p</i> -value | <i>p</i> -value for between group heterogeneity | <i>p</i> for heterogeneity | <i>I</i> <sup>2</sup> (%) |       |
|                             |                   |           | lower    | upper  |                 |                                                 |                            |                           |           |           | lower    | upper |                 |                                                 |                            |                           |       |
| Duration of vegetarian diet |                   |           |          |        |                 |                                                 |                            |                           |           |           |          |       |                 |                                                 |                            |                           |       |
|                             | < 12 weeks        | 2         | -3.40    | -11.09 | 4.29            | 0.386                                           | 0.254                      | 0.239                     | 28.0%     | 2         | -1.77    | -6.96 | 3.42            | 0.503                                           | 0.167                      | 47.7%                     |       |
|                             | ≥ 12 weeks        | 11        | 1.23     | -0.81  | 3.28            | 0.238                                           |                            | 0.005                     | 60.7%     | 11        | 0.21     | -1.09 | 1.51            | 0.749                                           |                            | 0.467                     | 64.4% |
| Region                      |                   |           |          |        |                 |                                                 |                            |                           |           |           |          |       |                 |                                                 |                            |                           |       |
|                             | Asia              | 1         | 1.00     | -9.00  | 11.00           | 0.845                                           | 0.052                      | -                         | -         | 1         | 1.00     | -4.54 | 6.54            | 0.724                                           | -                          | -                         |       |
|                             | Europe            | 2         | -5.40    | -11.32 | 0.52            | 0.074                                           |                            | 0.632                     | 0         | 2         | -1.68    | -6.87 | 3.51            | 0.526                                           | 0.152                      | 51.3%                     |       |
|                             | North America     | 9         | 1.05     | -1.25  | 3.35            | 0.373                                           |                            | 0.010                     | 59.9%     | 9         | -0.01    | -1.67 | 1.65            | 0.991                                           | 0.677                      | 0.002                     | 67.4% |
|                             | Oceania           | 1         | 4.00     | 0.83   | 7.17            | <b>0.014</b>                                    |                            | -                         | -         | 1         | 1.00     | -0.46 | 2.46            | 0.179                                           | -                          | -                         |       |
| Research type               |                   |           |          |        |                 |                                                 |                            |                           |           |           |          |       |                 |                                                 |                            |                           |       |
|                             | parallel design   | 11        | 0.67     | -1.45  | 2.79            | 0.536                                           | 0.524                      | 0.002                     | 63.9%     | 11        | -0.31    | -1.59 | 0.98            | 0.640                                           | 0.005                      | 60.3%                     |       |
|                             | cross-over design | 2         | 3.06     | -3.98  | 10.11           | 0.394                                           |                            | 0.568                     | 0         | 2         | 2.70     | 0.04  | 5.35            | 0.046                                           |                            | 0.495                     | 0     |
| Abbreviations:              |                   | SBP:      | systolic | blood  | pressure;       | DBP:                                            | diastolic                  | blood                     | pressure; | WMD:      | weighted | mean  | difference.     |                                                 |                            |                           |       |

Table A11. Begg's test and Egger's test for the observational studies.

|              | TC    | TG    | LDL-C | HDL-C | FBG   | HOMA-IR | HbA1c | SBP   | DBP   |
|--------------|-------|-------|-------|-------|-------|---------|-------|-------|-------|
| Begg's test  | 0.468 | 0.170 | 0.035 | 0.635 | 0.234 | 0.296   | 1.000 | 0.931 | 0.121 |
| Egger's test | 0.093 | 0.002 | 0.526 | 0.735 | 0.006 | 0.158   | 0.577 | 0.012 | 0.356 |

Abbreviations: TC: total cholesterol; TG: triglyceride; LDL-C: low-density lipoprotein-cholesterol; HDL-C: high-density lipoprotein-cholesterol; FBG: fasting blood glucose; HOMA-IR: homeostatic model assessment for insulin resistance; HbA1c: glycosylated hemoglobin; SBP: systolic blood pressure; DBP: diastolic blood pressure.

Table A12. Begg's test and Egger's test for the included randomized controlled trials.

|              | TC    | TG    | LDL-C | HDL-C | FBG   | HOMA-IR | HbA1c | SBP   | DBP   |
|--------------|-------|-------|-------|-------|-------|---------|-------|-------|-------|
| Begg's test  | 0.902 | 0.266 | 0.276 | 0.225 | 0.640 | 0.806   | 1.000 | 0.760 | 0.951 |
| Egger's test | 0.010 | 0.783 | 0.001 | 0.039 | 0.498 | 0.401   | 0.056 | 0.919 | 0.605 |

Abbreviations: TC: total cholesterol; TG: triglyceride; LDL-C: low-density lipoprotein-cholesterol; HDL-C: high-density lipoprotein-cholesterol; FBG: fasting blood glucose; HOMA-IR: homeostatic model assessment for insulin resistance; HbA1c: glycosylated hemoglobin; SBP: systolic blood pressure; DBP: diastolic blood pressure.

Table A13. Certainty of evidence for the included observational studies.

| Outcomes                       | Summary of findings                     |                             | Certainty of evidence     |                               |                          |                            | Certainty of evidence<br>(GRADE score) |
|--------------------------------|-----------------------------------------|-----------------------------|---------------------------|-------------------------------|--------------------------|----------------------------|----------------------------------------|
|                                | No. of participants<br>(no. of studies) | Mean difference<br>(95% CI) | Risk of Bias <sup>a</sup> | Publication bias <sup>b</sup> | Imprecision <sup>c</sup> | Inconsistency <sup>d</sup> |                                        |
| TC (mmol/L)                    | 108409 (55)                             | -0.54 (-0.60 to -0.48)      | ●                         | ●                             | ●                        | ○                          | ●●● Moderate                           |
| TG (mmol/L)                    | 63618 (53)                              | -0.11 (-0.17 to -0.05)      | ●                         | ○                             | ○                        | ○                          | ● Very Low                             |
| LDL-C (mmol/L)                 | 62806 (44)                              | -0.41 (-0.48 to -0.34)      | ●                         | ●                             | ●                        | ○                          | ●●● Moderate                           |
| HDL-C (mmol/L)                 | 64610 (49)                              | -0.07 (-0.09 to -0.05)      | ●                         | ●                             | ●                        | ○                          | ●●● Moderate                           |
| Fasting blood glucose (mmol/L) | 61853 (31)                              | -0.26 (-0.34 to -0.19)      | ●                         | ○                             | ●                        | ○                          | ●● Low                                 |
| HOMA-IR                        | 1301 (3)                                | -0.14 (-0.44 to 0.16)       | ●                         | ●                             | ○                        | ○                          | ●● Low                                 |
| HbA1c (%)                      | 1361 (6)                                | -0.07 (-0.24 to 0.10)       | ●                         | ●                             | ○                        | ○                          | ●● Low                                 |
| SBP (mmHg)                     | 107844 (42)                             | -4.30 (-5.63 to -2.97)      | ●                         | ○                             | ●                        | ○                          | ●● Low                                 |
| DBP (mmHg)                     | 107705 (41)                             | -2.63 (-3.47 to -1.79)      | ●                         | ●                             | ●                        | ○                          | ●●● Moderate                           |

Abbreviations: CI: confidence interval; GRADE: Grading of Recommendations, Assessment, Development and Evaluations; TC: total cholesterol concentration; TG: triglyceride concentration; LDL-C: low-density lipoprotein-cholesterol; HDL-C: high-density lipoprotein-cholesterol; FBG: fasting blood glucose; HOMA-IR: homeostatic model assessment for insulin resistance; HbA1c: glycated hemoglobin; SBP: systolic blood pressure; DBP: diastolic blood pressure.

<sup>a</sup> Downgraded by one level if >25% of participants were from studies with a Newcastle-Ottawa Scale < 4.

<sup>b</sup> Downgraded by one level if the p-value of Egger's test < 0.05.

<sup>c</sup> Downgraded by one level if a wide confidence interval was observed.

<sup>d</sup> Downgraded by one level if a substantial heterogeneity.

Table A14. Certainty of evidence for the included randomized controlled trials.

| Outcomes                       | Summary of findings                    |                             | Certainty of evidence     |                               |                          |                            | Certainty of evidence<br>(GRADE score) |
|--------------------------------|----------------------------------------|-----------------------------|---------------------------|-------------------------------|--------------------------|----------------------------|----------------------------------------|
|                                | No. of participants<br>(no. of trials) | Mean difference<br>(95% CI) | Risk of Bias <sup>a</sup> | Publication bias <sup>b</sup> | Imprecision <sup>c</sup> | Inconsistency <sup>d</sup> |                                        |
| TC (mmol/L)                    | 1343 (17)                              | -0.24 (-0.37 to -0.10)      | ●                         | ○                             | ●                        | ○                          | ●● Low                                 |
| TG (mmol/L)                    | 1455 (17)                              | -0.002 (-0.09 to 0.09)      | ●                         | ●                             | ○                        | ○                          | ●● Low                                 |
| LDL-C (mmol/L)                 | 1289 (15)                              | -0.25 (-0.38 to -0.12)      | ●                         | ○                             | ●                        | ○                          | ●● Low                                 |
| HDL-C (mmol/L)                 | 1451 (18)                              | -0.07 (-0.11 to -0.04)      | ●                         | ○                             | ●                        | ○                          | ●● Low                                 |
| Fasting blood glucose (mmol/L) | 814 (11)                               | -0.50 (-0.80 to -0.20)      | ●                         | ●                             | ●                        | ○                          | ●●● Moderate                           |
| HOMA-IR                        | 624 (5)                                | -0.96 (-1.37 to -0.55)      | ●                         | ●                             | ●                        | ●                          | ●●●● High                              |
| HbA1c (%)                      | 847 (12)                               | -0.10 (-0.19 to -0.01)      | ●                         | ●                             | ●                        | ●                          | ●●●● High                              |
| SBP (mmHg)                     | 983 (13)                               | 0.88 (-1.10 to 2.85)        | ●                         | ●                             | ○                        | ○                          | ●● Low                                 |
| DBP (mmHg)                     | 983 (13)                               | 0.04 (-1.20 to 1.28)        | ●                         | ●                             | ○                        | ○                          | ●● Low                                 |

Abbreviations: CI: confidence interval; GRADE: Grading of Recommendations, Assessment, Development and Evaluations; TC: total cholesterol concentration; TG: triglyceride concentration; LDL-C: low-density lipoprotein-cholesterol; HDL-C: high-density lipoprotein-cholesterol; FBG: fasting blood glucose; HOMA-IR: homeostatic model assessment for insulin resistance; HbA1c: glycated hemoglobin; SBP: systolic blood pressure; DBP: diastolic blood pressure.

<sup>a</sup> Downgraded by one level if >25% of participants were from trials at a high risk of bias.

<sup>b</sup> Downgraded by one level if the p-value of Egger's test < 0.05.

<sup>c</sup> Downgraded by one level if a wide confidence interval was observed.

<sup>d</sup> Downgraded by one level if a substantial heterogeneity.

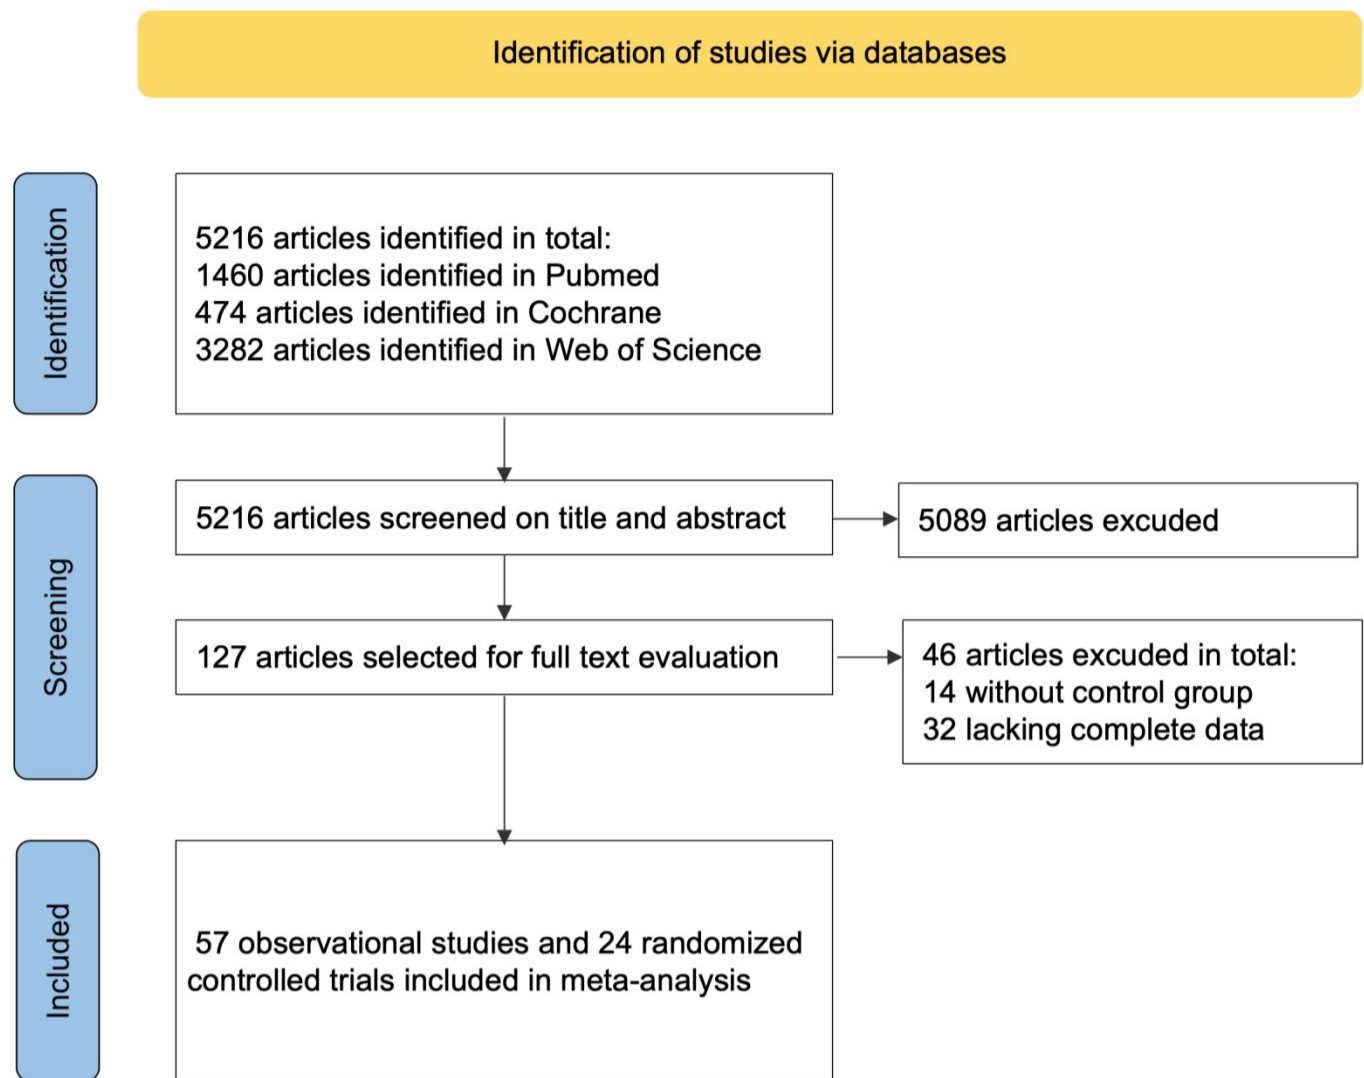

Figure A1. Flow diagram of the paper selection process.

| Study ID                    | Outcome                                     | D1 | D2 | D3 | D4 | D5 | Overall |
|-----------------------------|---------------------------------------------|----|----|----|----|----|---------|
| Cooper et al, 1982          | TC/TG/HDL-C/LDL-C/FBG                       | +  | +  | +  | +  | !  | !       |
| Sciarrone et al, 1993       | SBP/DBP/FBG/FBI                             | +  | +  | +  | +  | +  | +       |
| Kontessis et al, 1995       | HbA1c                                       | +  | +  | +  | +  | +  | +       |
| Nicholson et al, 1999       | SBP/DBP/TC/TG/HDL-C/HbA1c                   | !  | !  | +  | +  | !  | -       |
| Barnard et al, 2000         | TC/TG/LDL-C/HDL-C                           | +  | +  | +  | +  | +  | +       |
| Agren et al, 2001           | TC/TG/LDL-C/HDL-C                           | !  | !  | +  | +  | +  | !       |
| Wheeler et al, 2002         | SBP/DBP/TC/HDL-C/HbA1c                      | +  | +  | +  | +  | +  | +       |
| Barnard et al, 2005         | FBG/FBI                                     | +  | +  | +  | +  | +  | +       |
| Barnard et al, 2006         | SBP/DBP/TC/TG/LDL-C/HDL-C/FBG/HbA1c         | +  | +  | +  | +  | +  | +       |
| Burke et al, 2007           | TC/TG/HOMA-IR                               | +  | +  | +  | +  | +  | +       |
| Elkan et al, 2008           | TC/TG/LDL-C/HDL-C                           | +  | !  | +  | +  | +  | !       |
| Barnard et al, 2009         | SBP/DBP/TG/HDL-C/FBG                        | +  | +  | +  | +  | +  | +       |
| Levin et al, 2010           | SBP/DBP/HbA1c/TC/LDL-C/HDL-C                | !  | !  | +  | +  | +  | !       |
| Kahleova et al, 2011        | TC/TG/LDL-C/HDL-C/FBG/FBI/HbA1c             | +  | +  | +  | +  | +  | +       |
| Mishra et al, 2013          | SBP/DBP/TG/TC/LDL-C/HDL-C                   | +  | +  | +  | +  | +  | +       |
| Bunner et al, 2015          | SBP/DBP/TC/TG/LDL-C/HDL-C/FBG/HbA1c         | +  | +  | +  | +  | +  | +       |
| Wright et al, 2017          | SBP/DBP/TC/TG/LDL-C/HDL-C/HbA1c             | !  | +  | +  | +  | +  | !       |
| Barnard et al, 2018         | SBP/DBP/TC/LDL-C/HDL-C                      | !  | +  | +  | +  | +  | !       |
| Kahleova et al, 2020        | TC/TG/LDL-C/HDL-C/FBG/FBI/HbA1c/HOMA-IR     | +  | +  | +  | +  | +  | +       |
| Barnard et al, 2021         | SBP/DBP/TC/TG/LDL-C/HDL-C/FBG/HbA1c/HOMA-IR | +  | +  | +  | +  | +  | +       |
| Dressler et al, 2022        | SBP/DBP/TC/TG/LDL-C/HDL-C/FBG/HbA1c/HOMA-IR | +  | +  | +  | +  | +  | +       |
| Crosby et al, 2022          | HOMA-IR                                     | +  | +  | +  | +  | +  | +       |
| Turner-McGrievy et al, 2022 | SBP/DBP/HbA1c                               | +  | +  | +  | +  | !  | !       |
| Walrabenstein et al, 2023   | SBP/DBP/TG/LDL-C/HDL-C/FBG/HbA1c            | +  | +  | +  | +  | +  | +       |

- + Low risk
- ! Some concerns
- High risk

- D1 Randomisation proces
- D2 Deviations from the intended intervotions
- D3 Missing outcome data
- D4 Measurement of the outcome
- D5 Selection of the reported result

Figure A2. Risk of bias assessment for the included randomized controlled trials.



**A**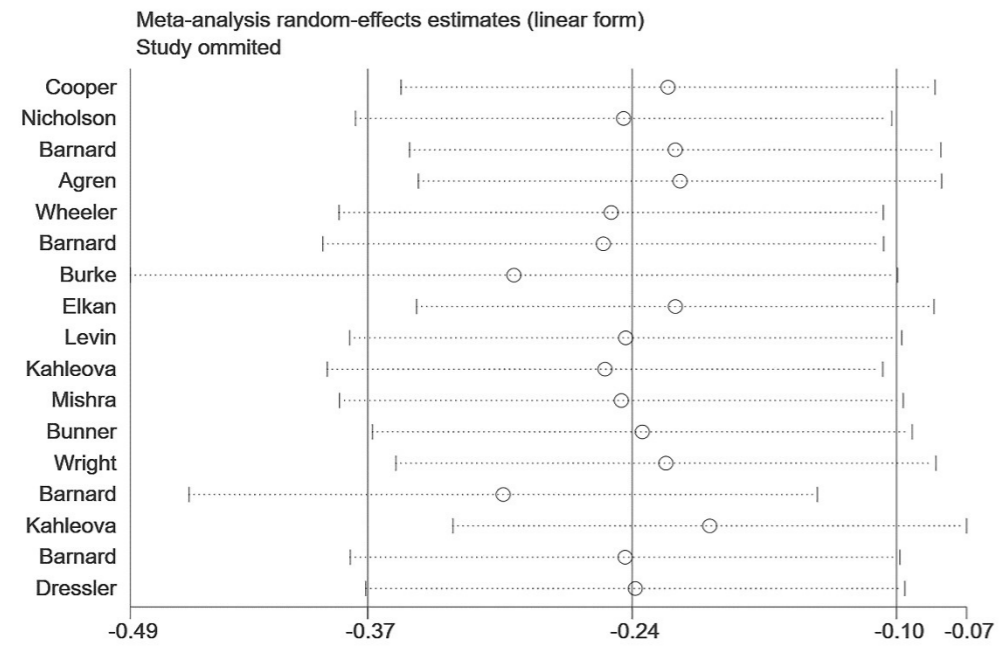**B**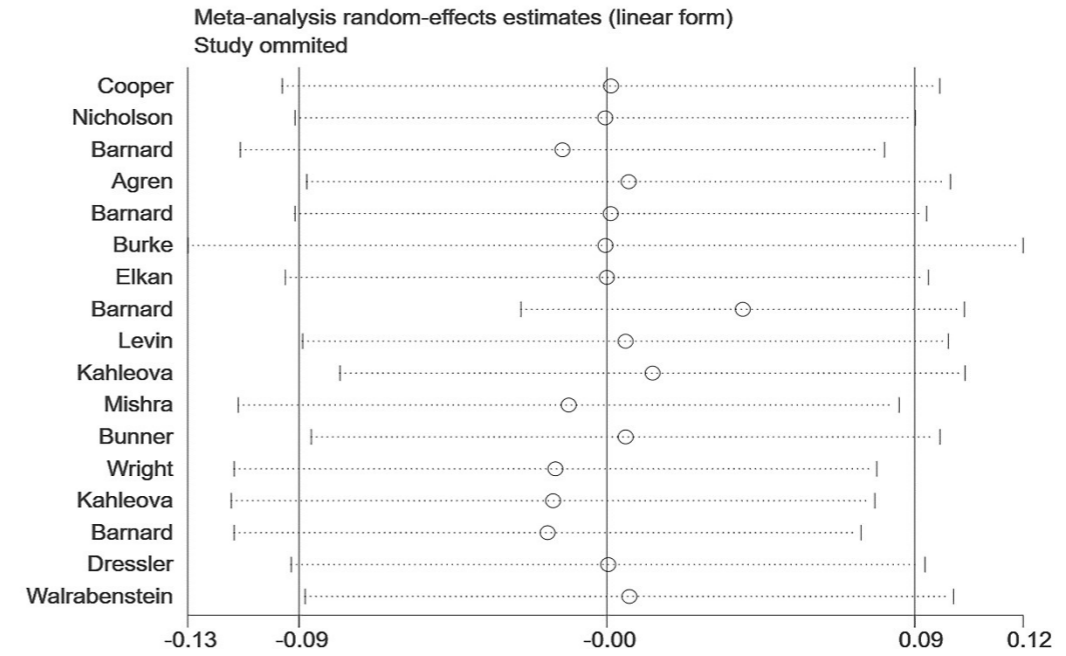**C**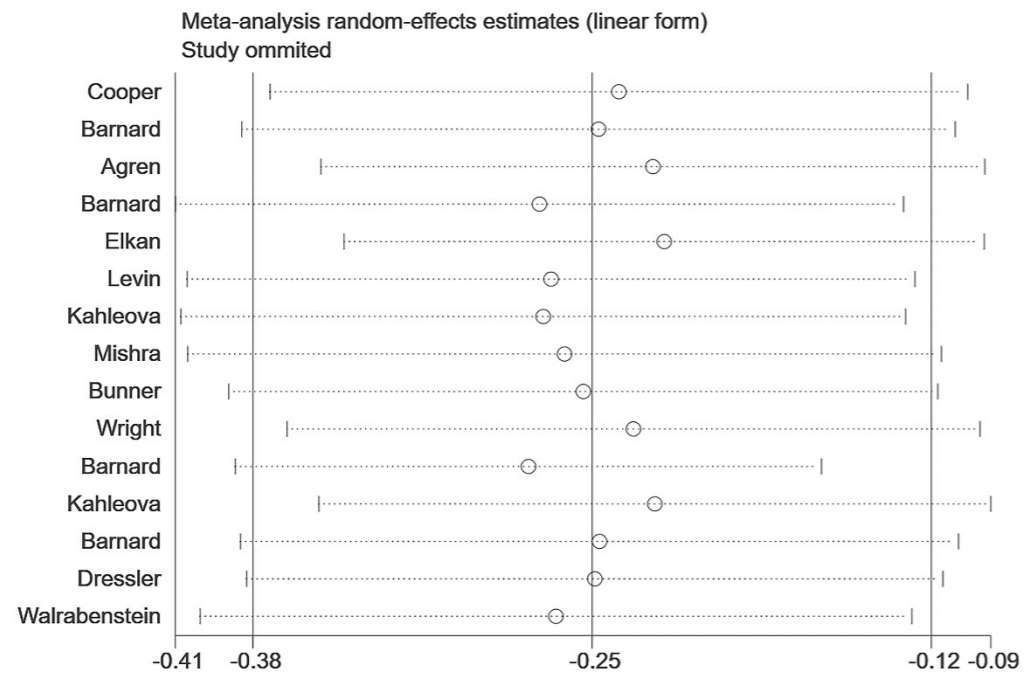**D**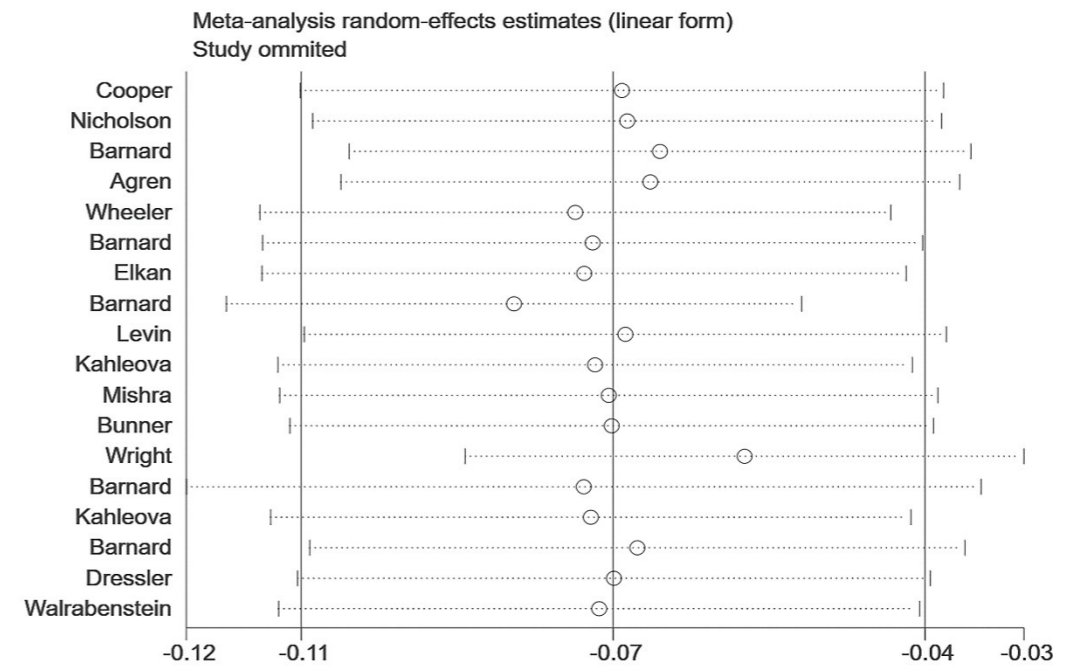

**E**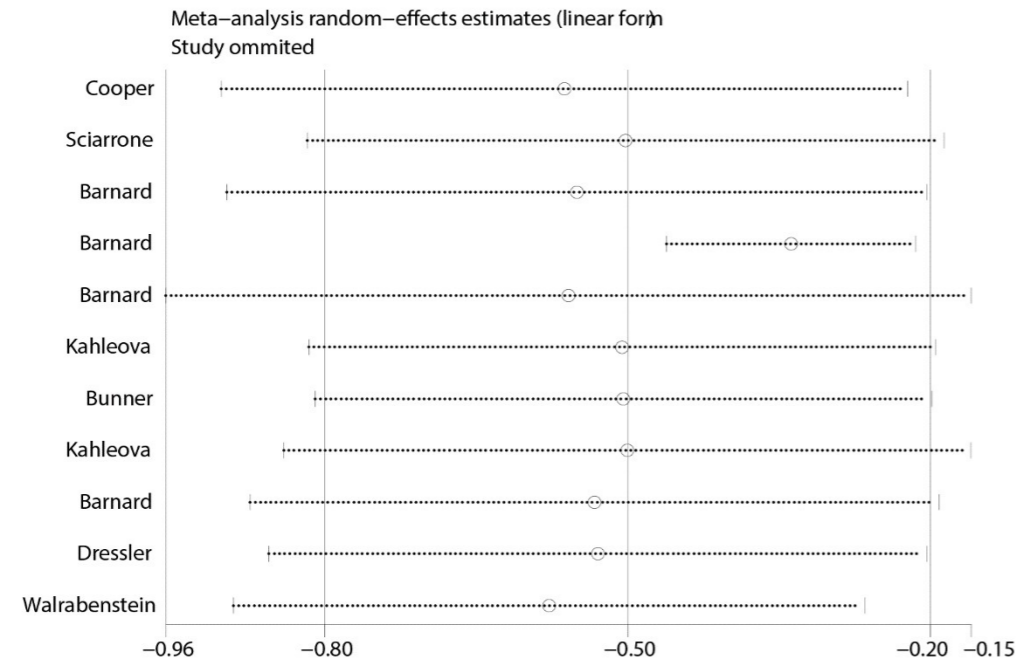**F**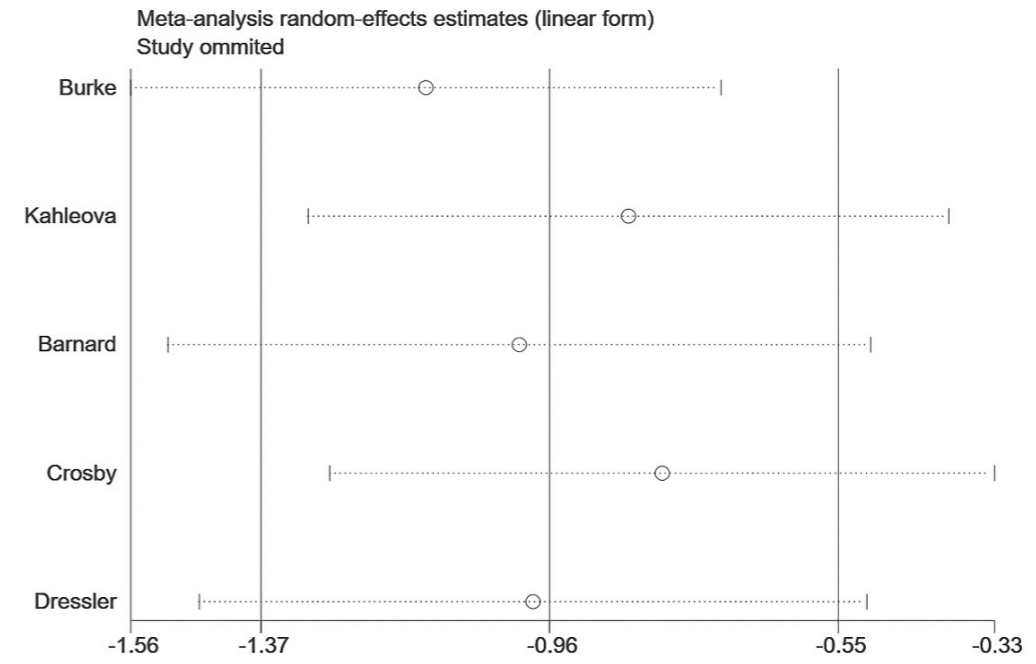**G**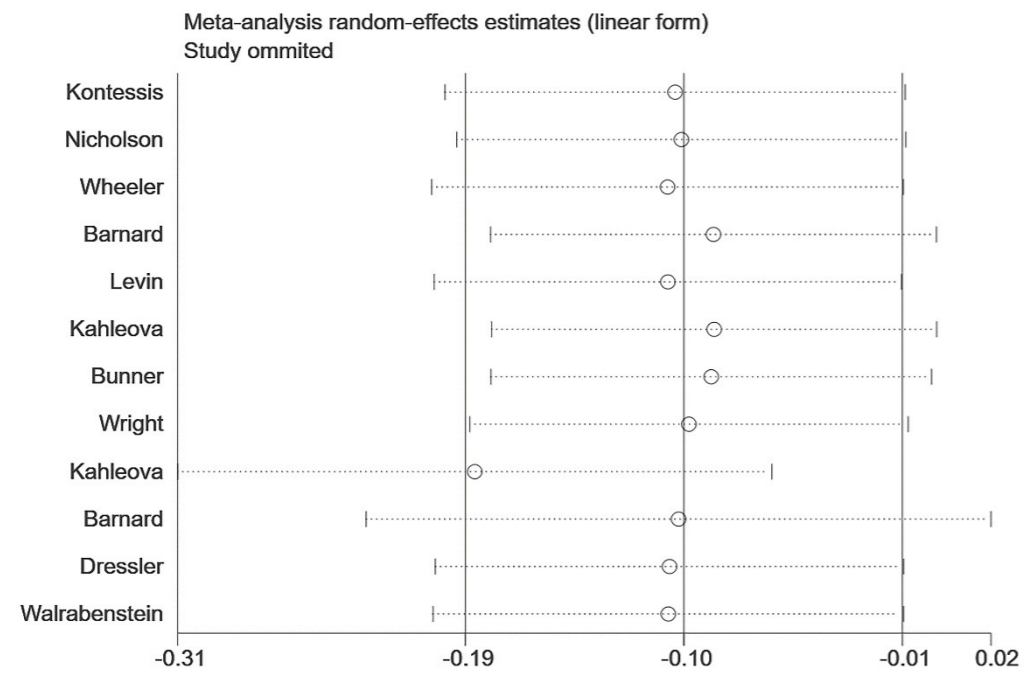**H**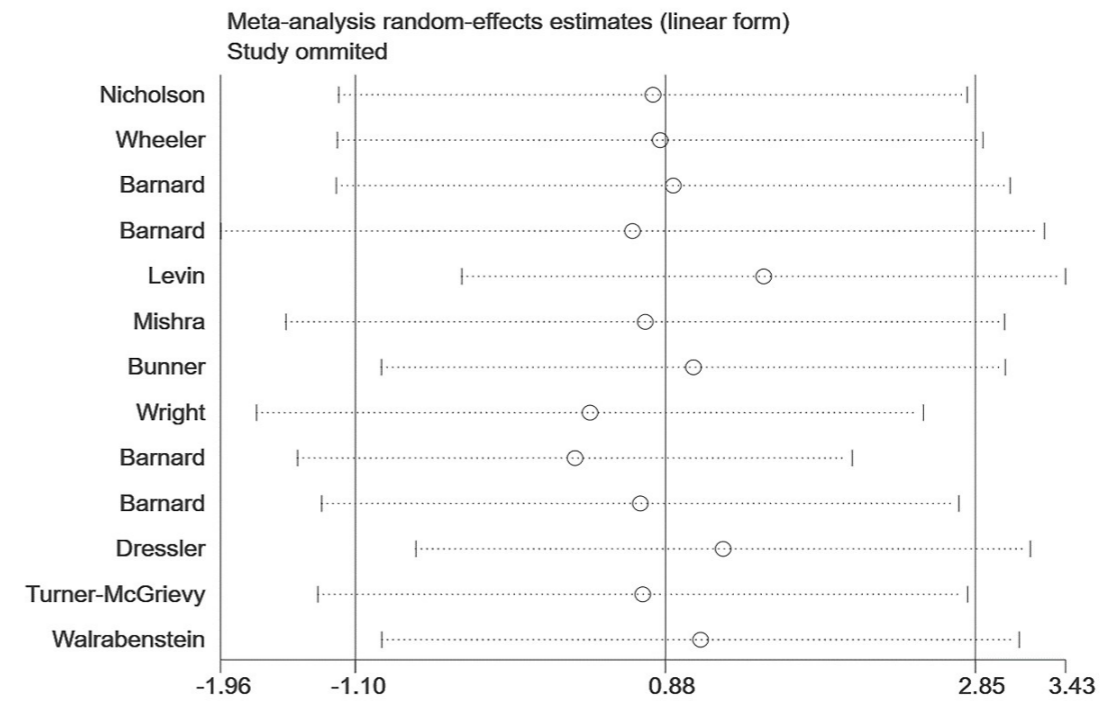

I

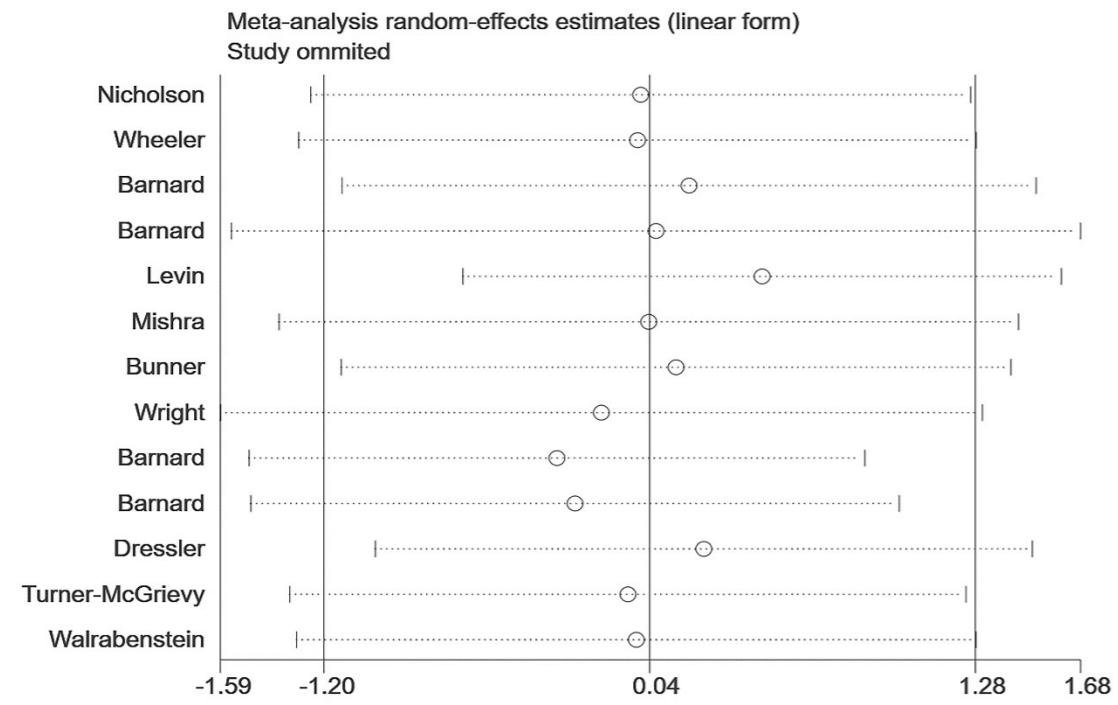

Figure A3. Sensitivity analysis for the included randomized controlled trials.

A. TC: total cholesterol; B. TG: triglyceride; C. LDL-C: low-density lipoprotein-cholesterol; D. HDL-C: high-density lipoprotein-cholesterol; E. FBG: fasting blood glucose; F. HOMA-IR: homeostatic model assessment for insulin resistance; G. HbA1c: glycosylated hemoglobin; H. SBP: systolic blood pressure; I. DBP: diastolic blood pressure.

A

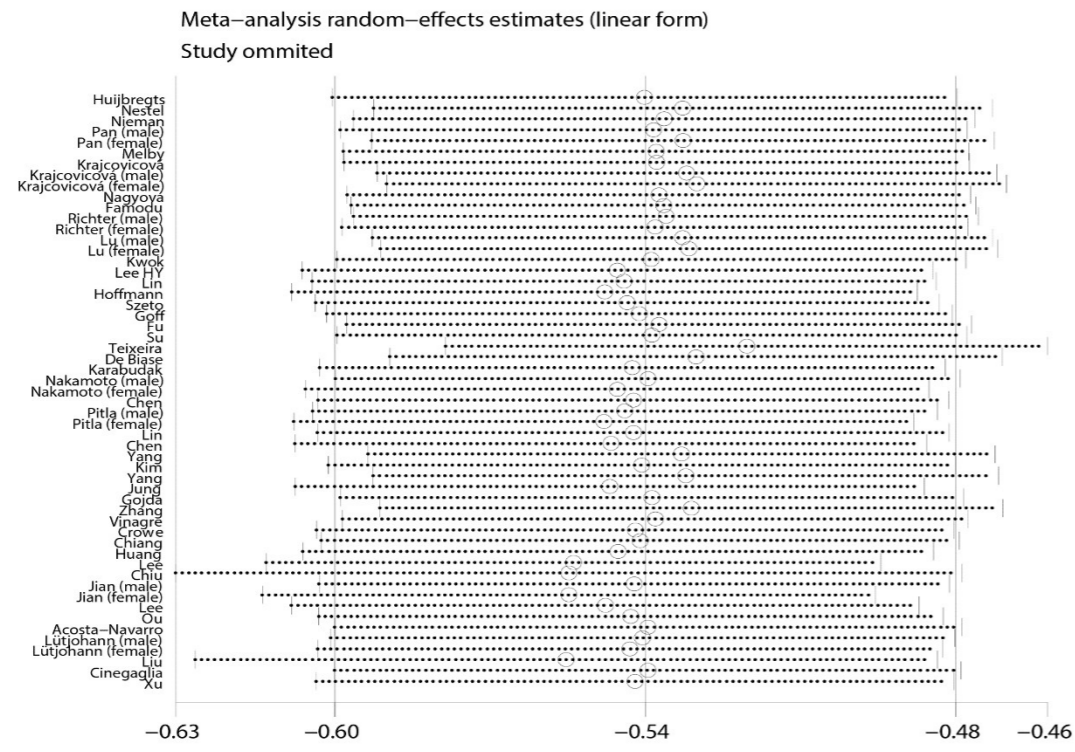

B

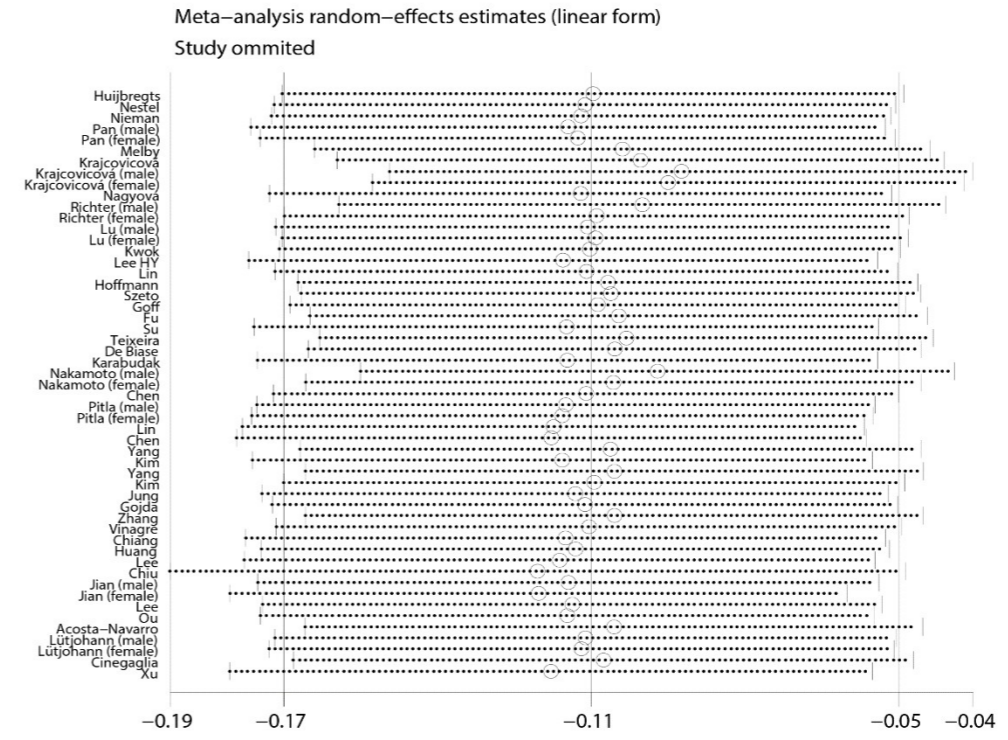

C

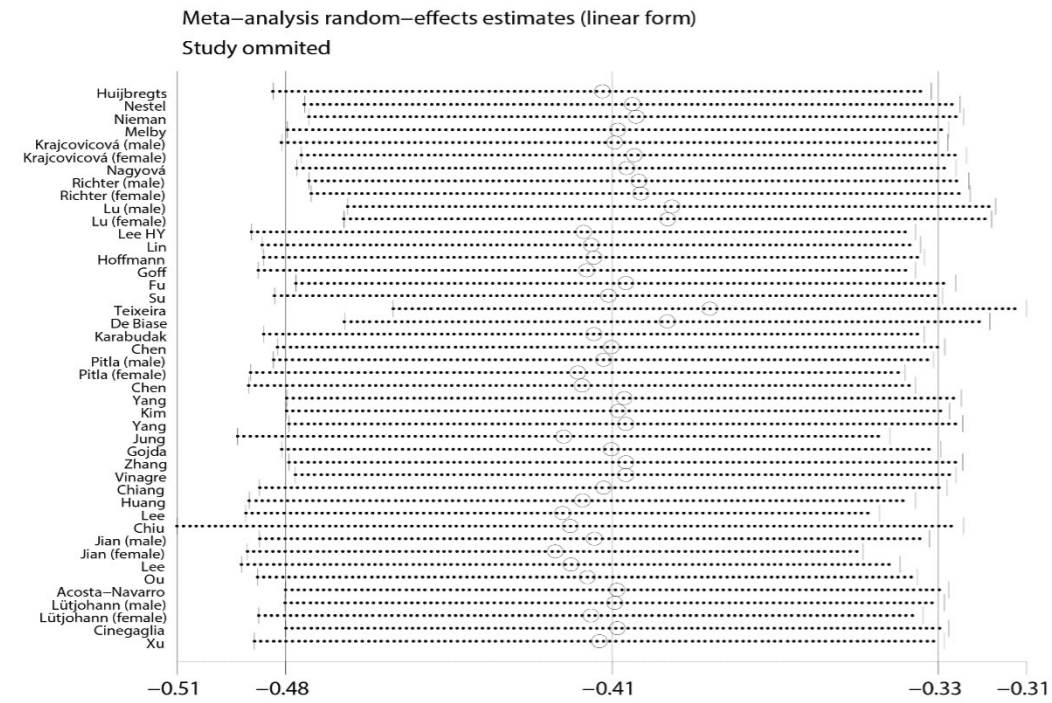

D

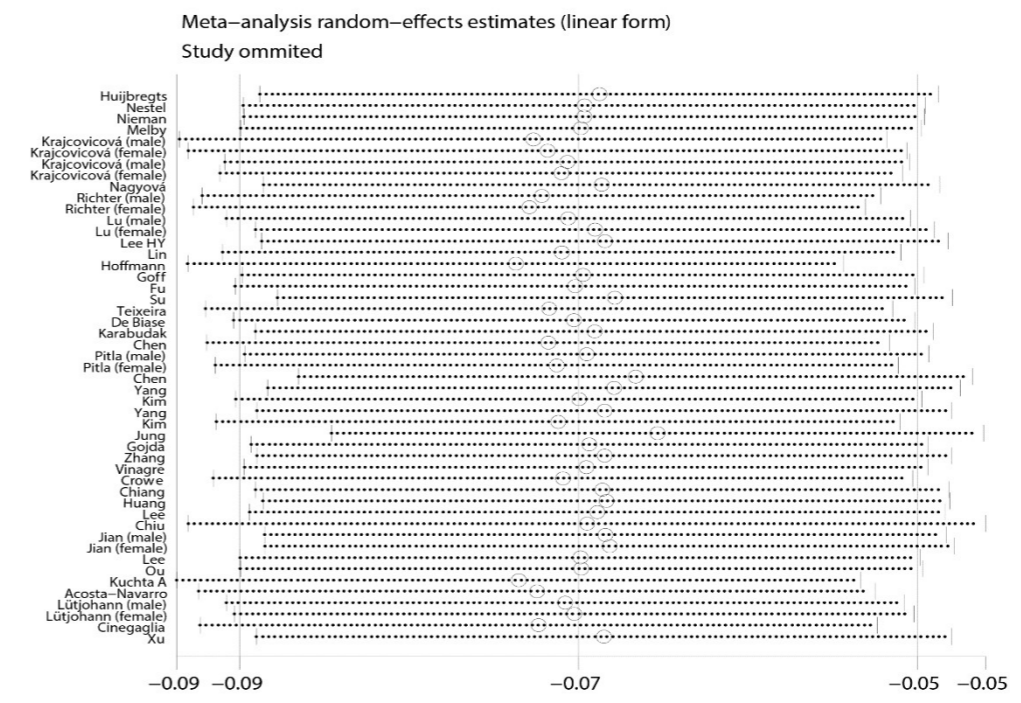

E

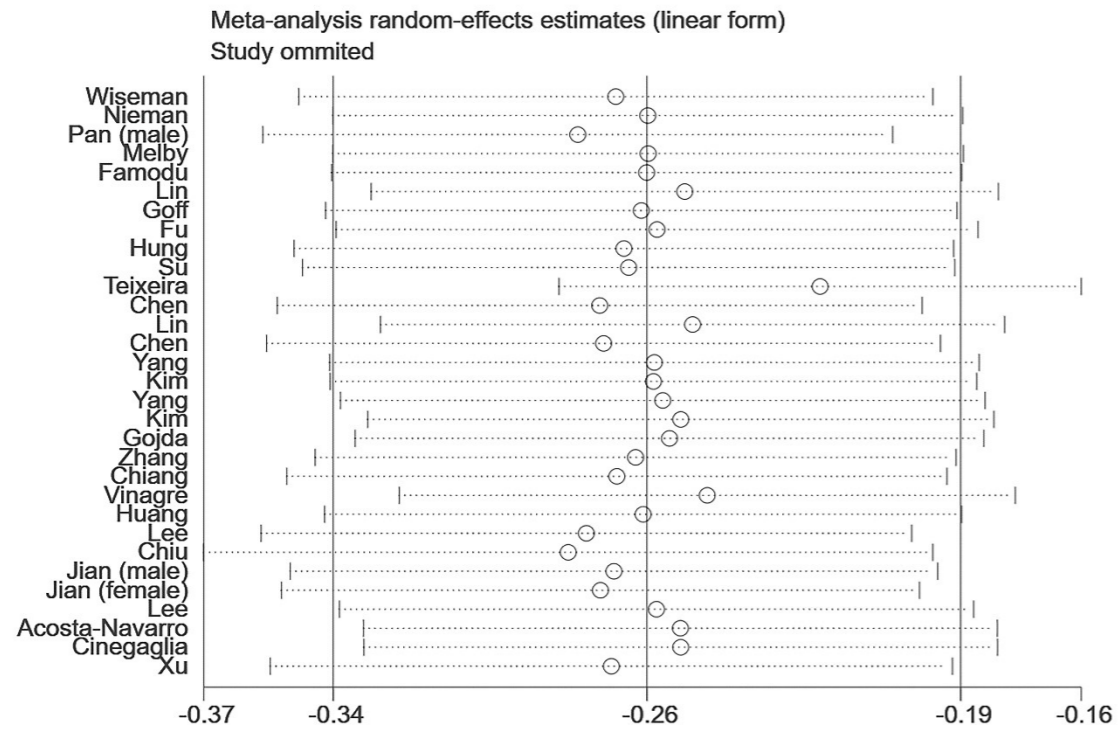

F

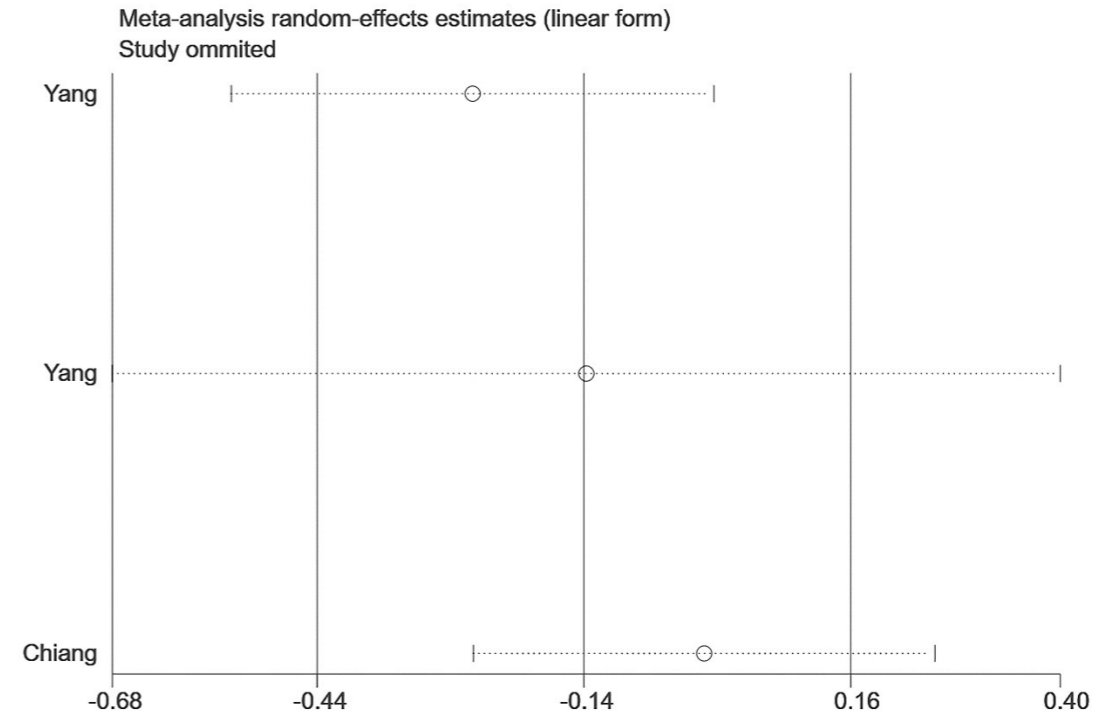

G

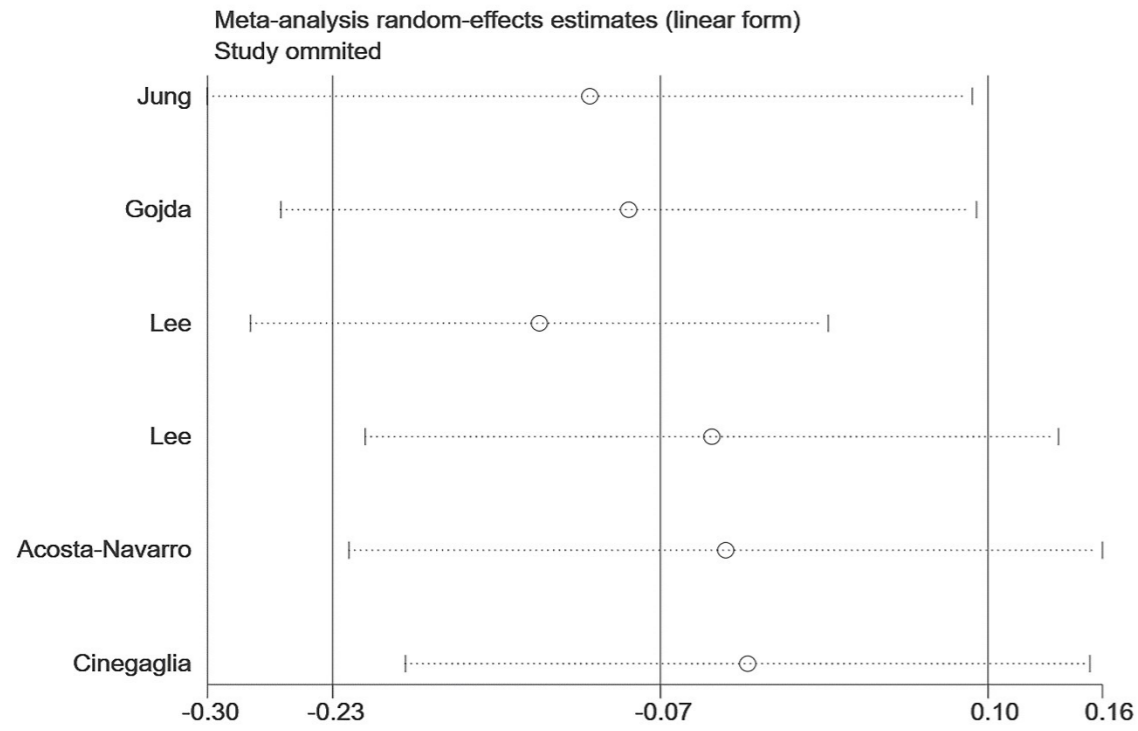

H

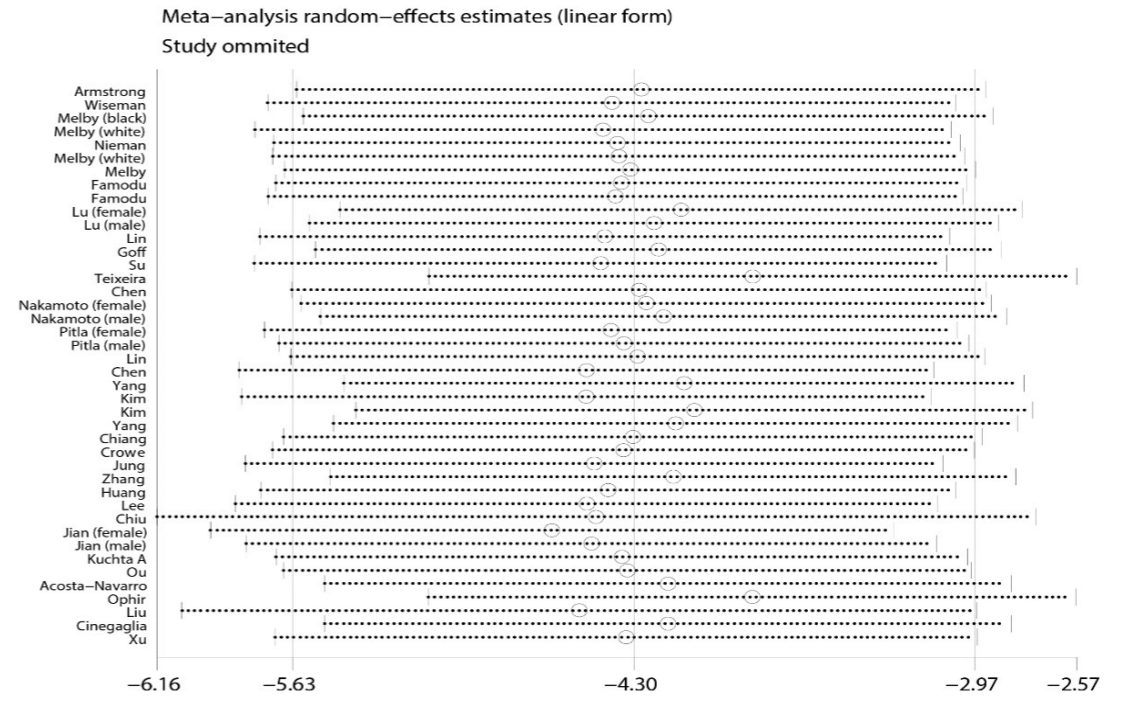

I

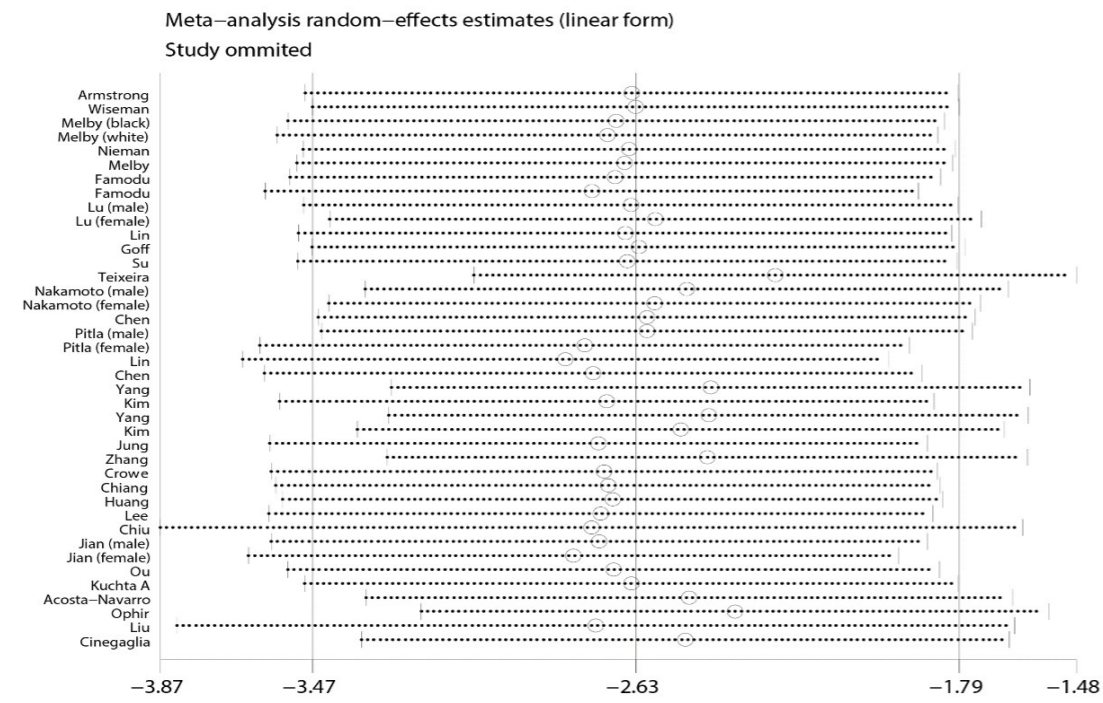

Figure A4. Sensitivity analysis for the included observational studies.

A. TC: total cholesterol; B. TG: triglyceride; C. LDL-C: low-density lipoprotein-cholesterol; D. HDL-C: high-density lipoprotein-cholesterol; E. FBG: fasting blood glucose; F. HOMA-IR: homeostatic model assessment for insulin resistance; G. HbA1c: glycosylated hemoglobin; H. SBP: systolic blood pressure; I. DBP: diastolic blood pressure.

**A**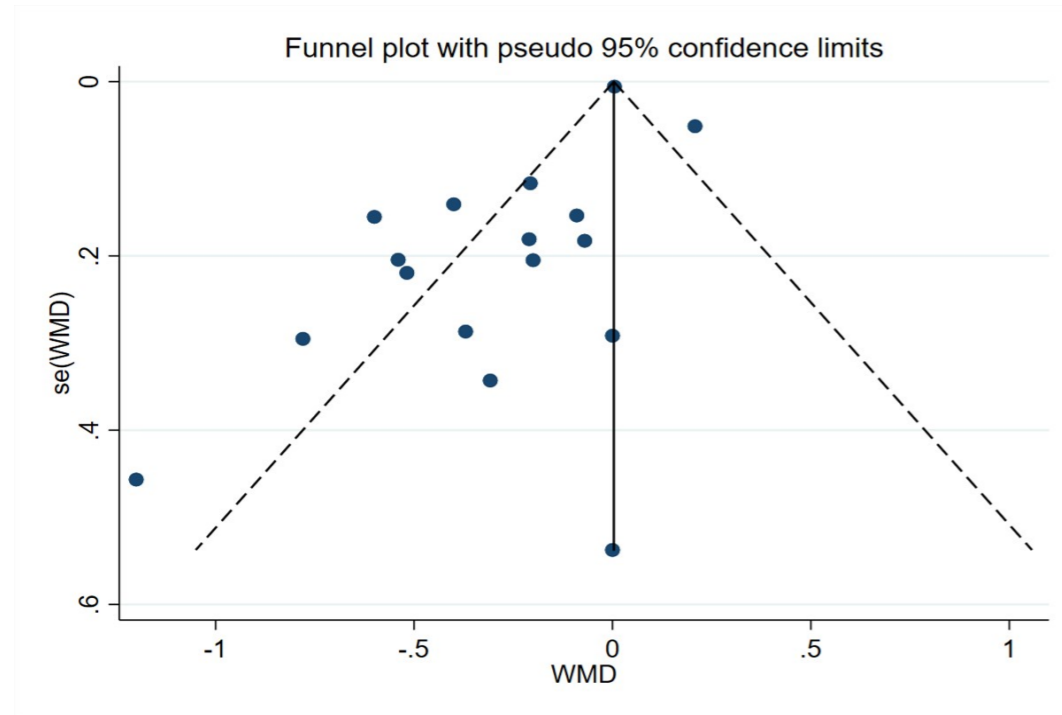**B**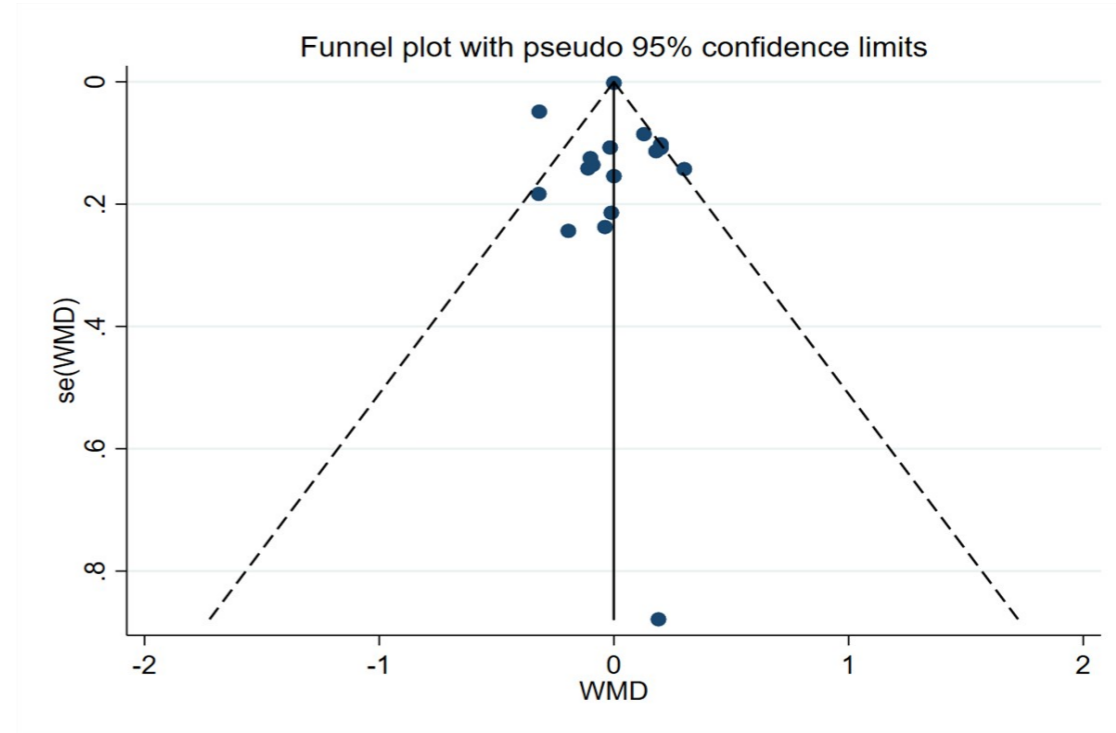**C**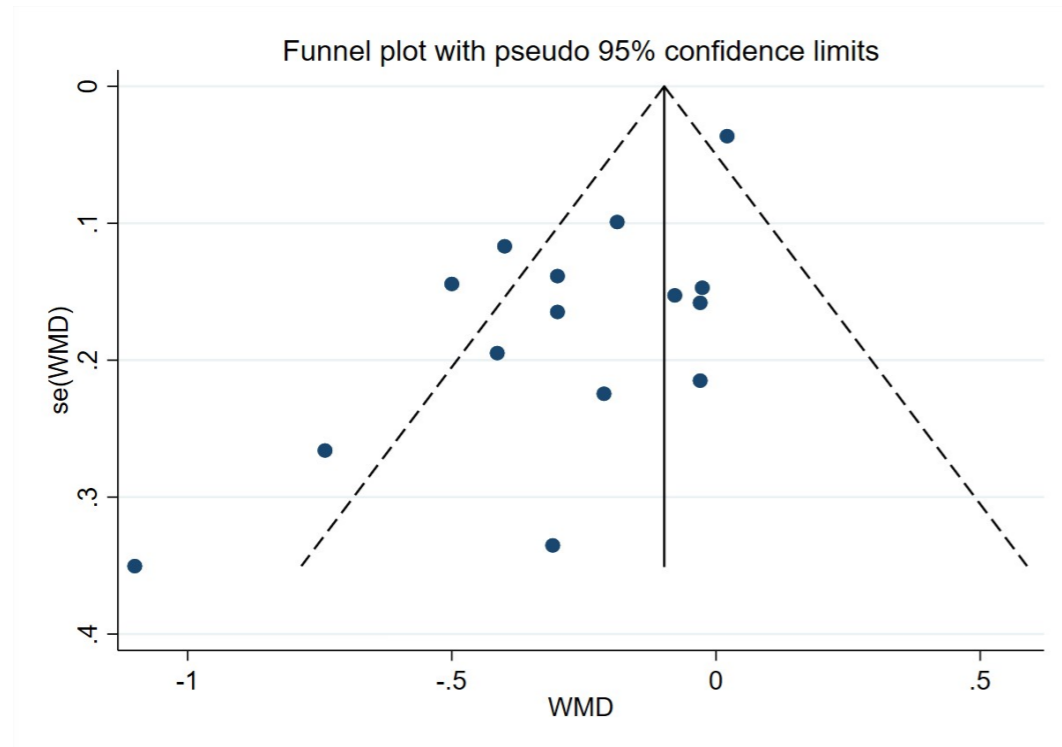**D**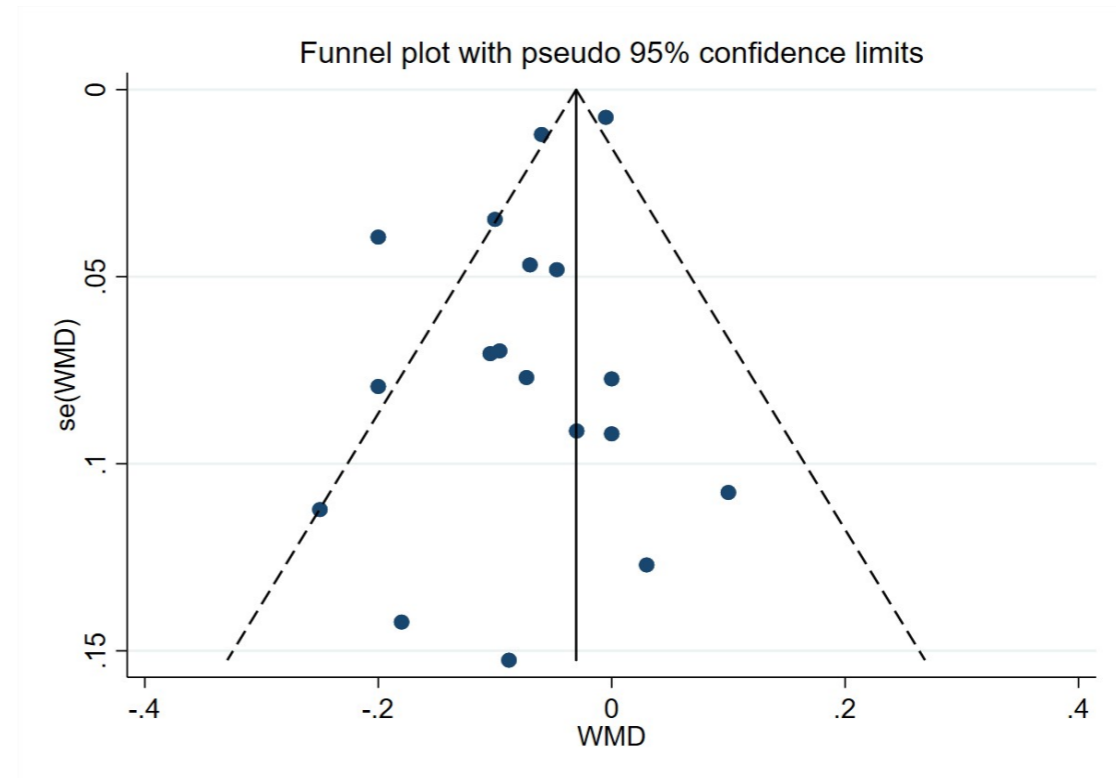

**E**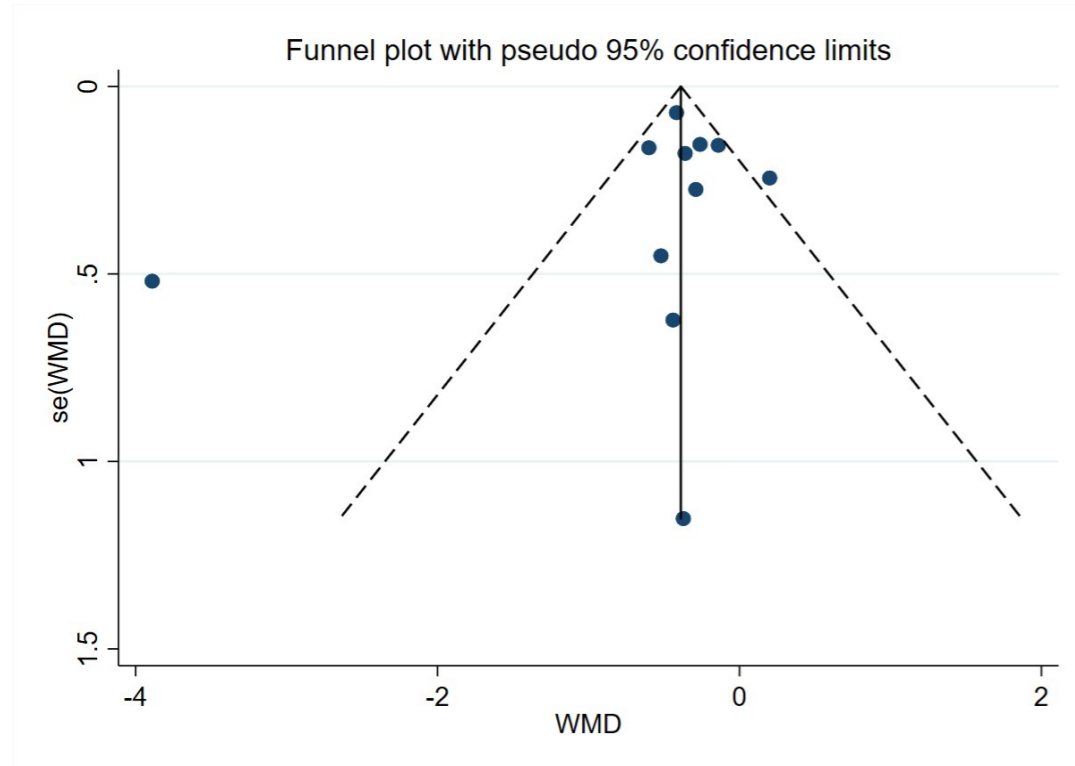**F**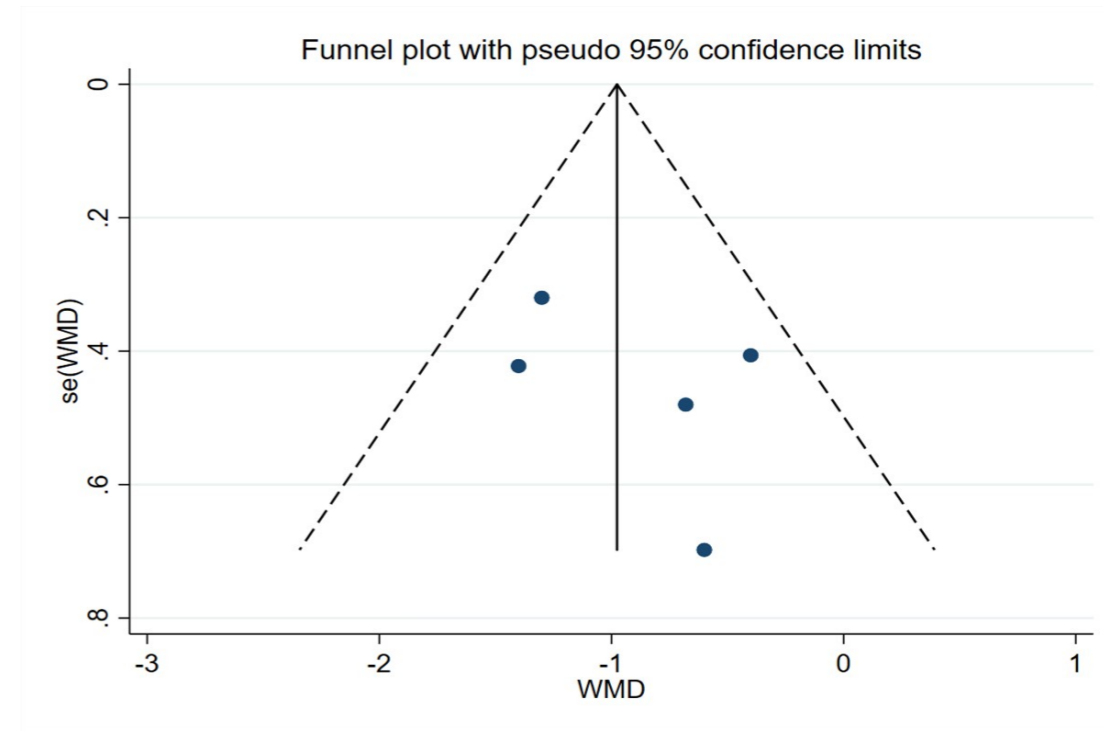**G**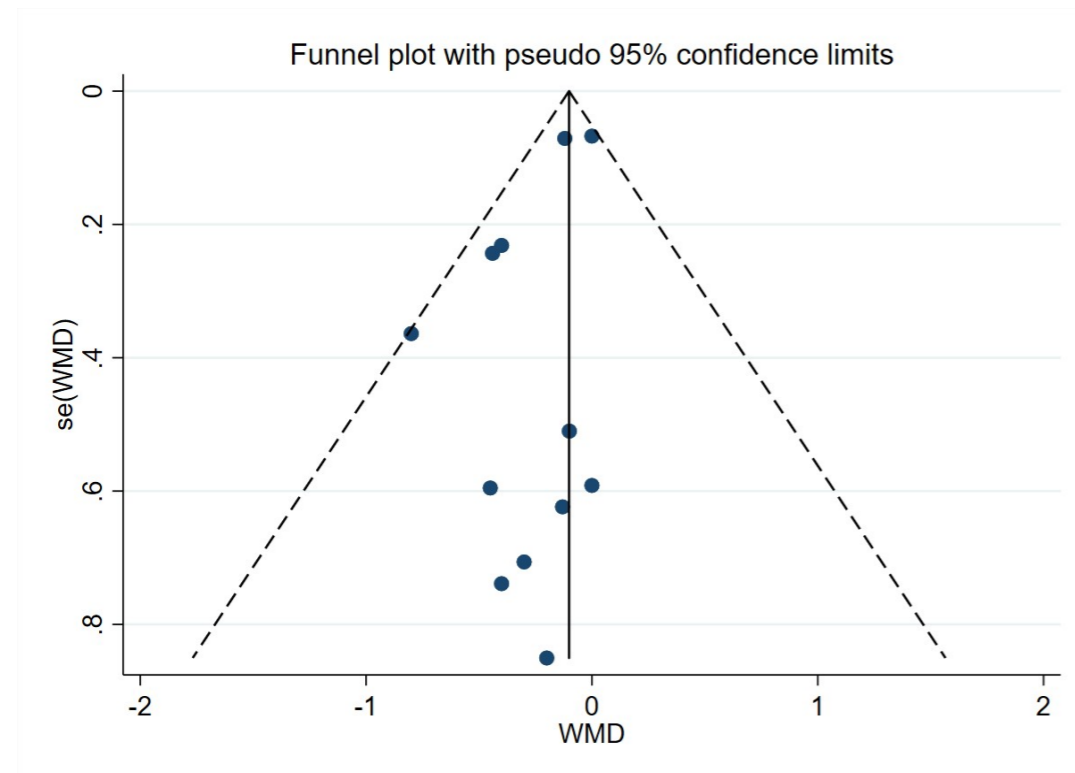**H**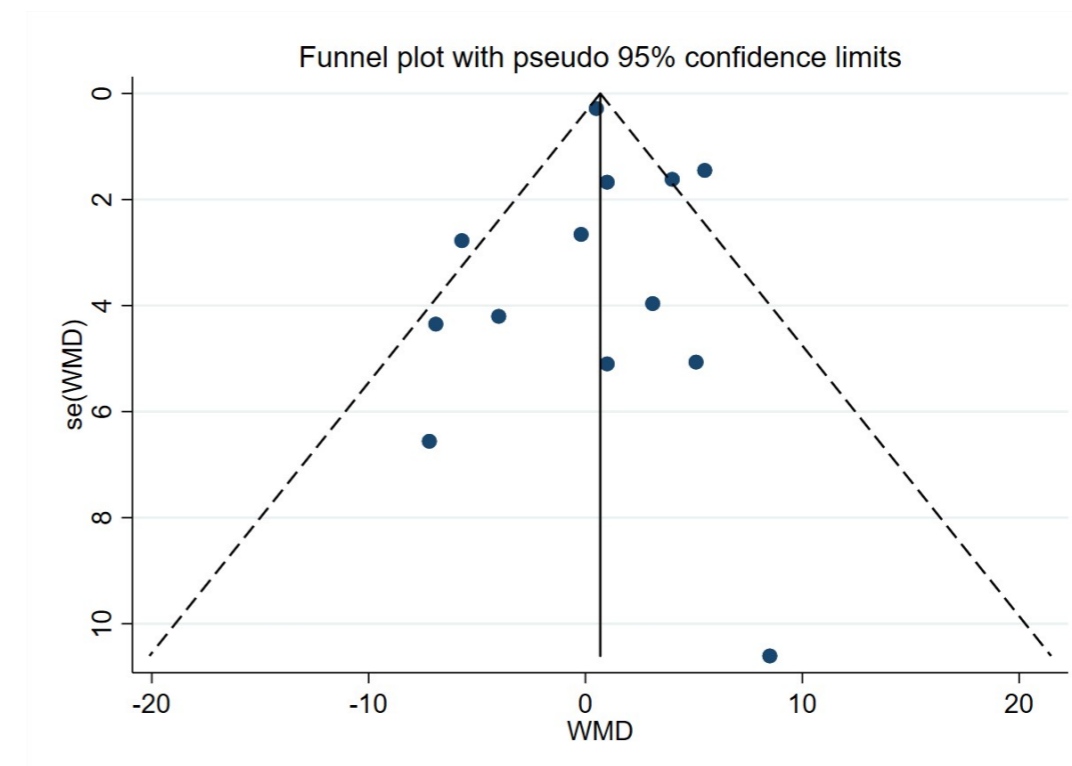



I

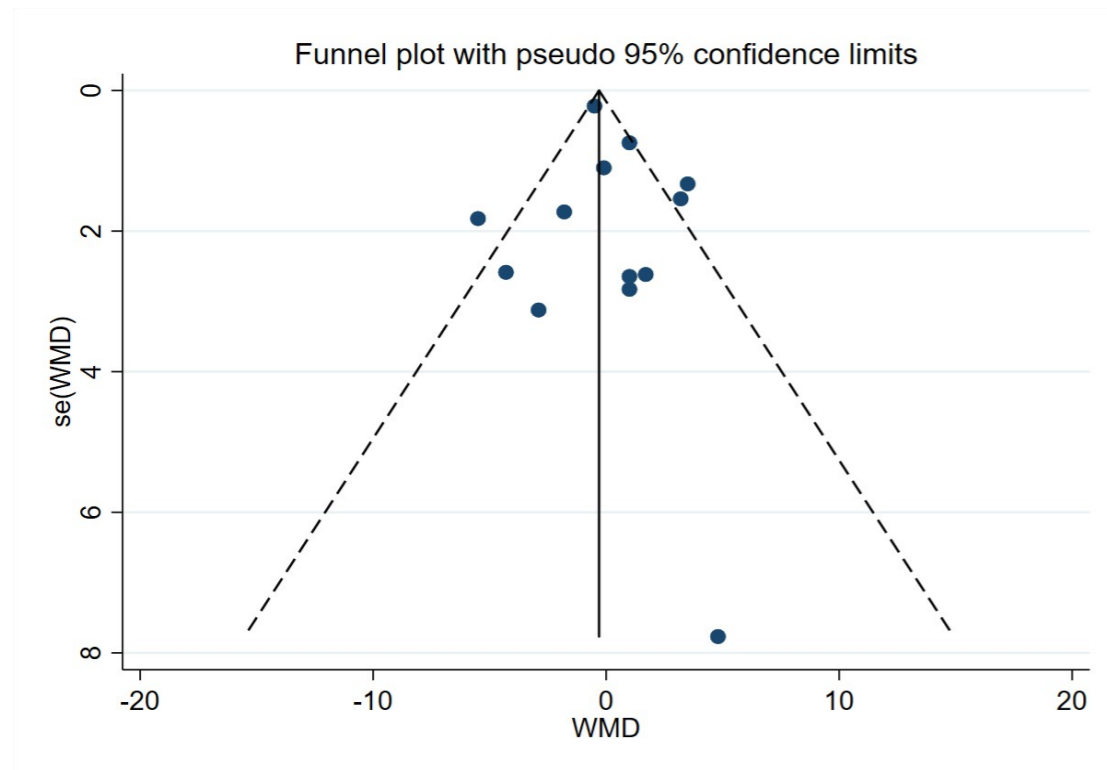

Figure A5. Funnel plots for the included randomized controlled trials.

A. TC: total cholesterol; B. TG: triglyceride; C. LDL-C: low-density lipoprotein-cholesterol; D. HDL-C: high-density lipoprotein-cholesterol; E. FBG: fasting blood glucose; F. HOMA-IR: homeostatic model assessment for insulin resistance; G. HbA1c: glycosylated hemoglobin; H. SBP: systolic blood pressure; I. DBP: diastolic blood pressure.

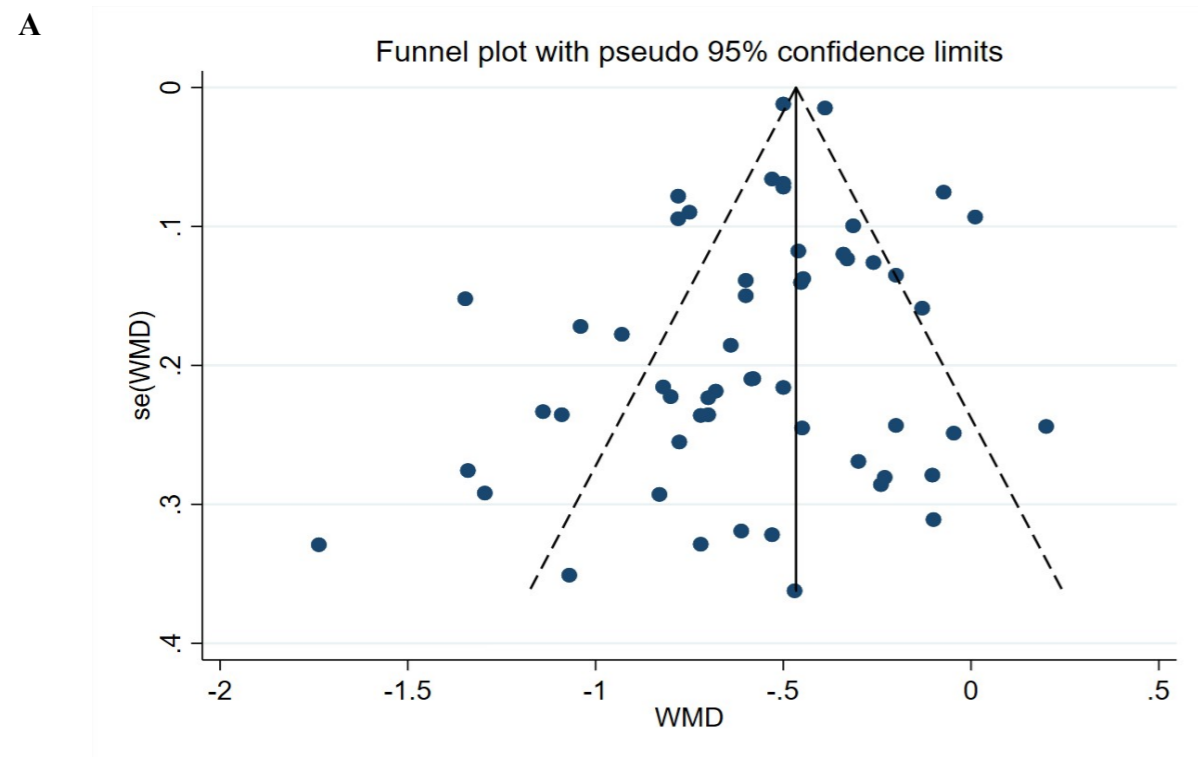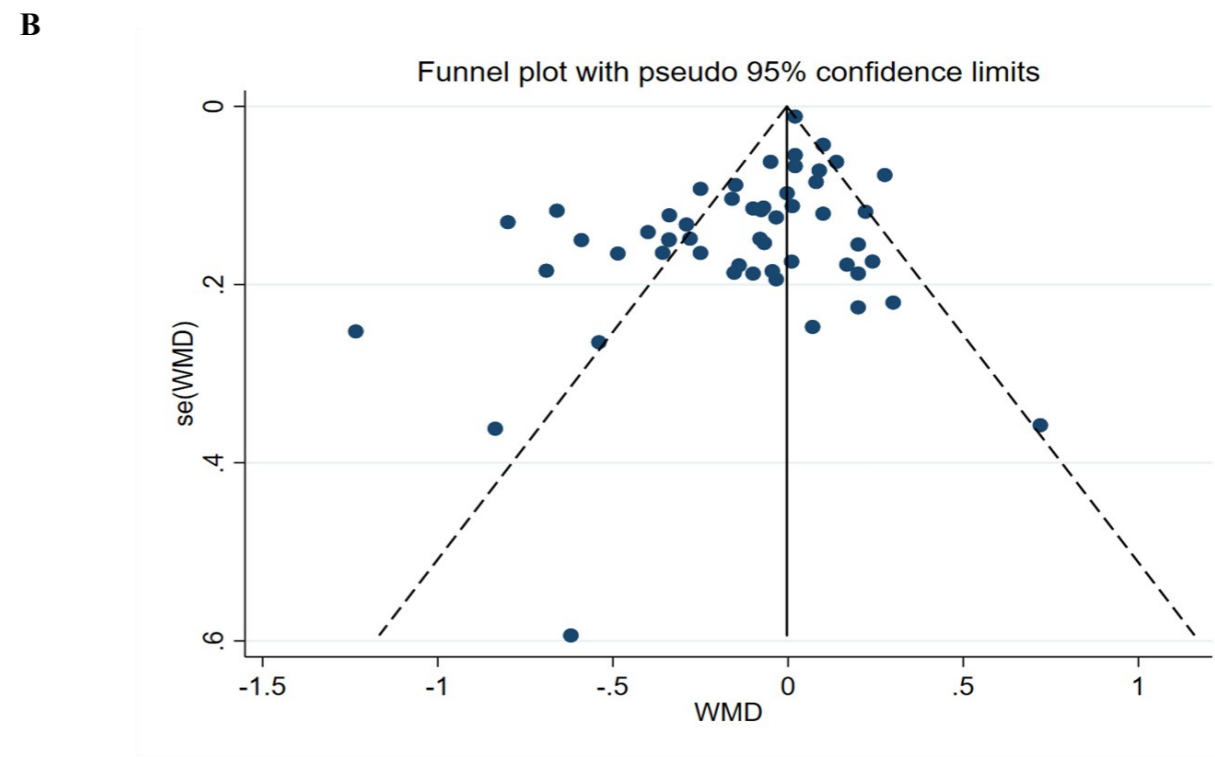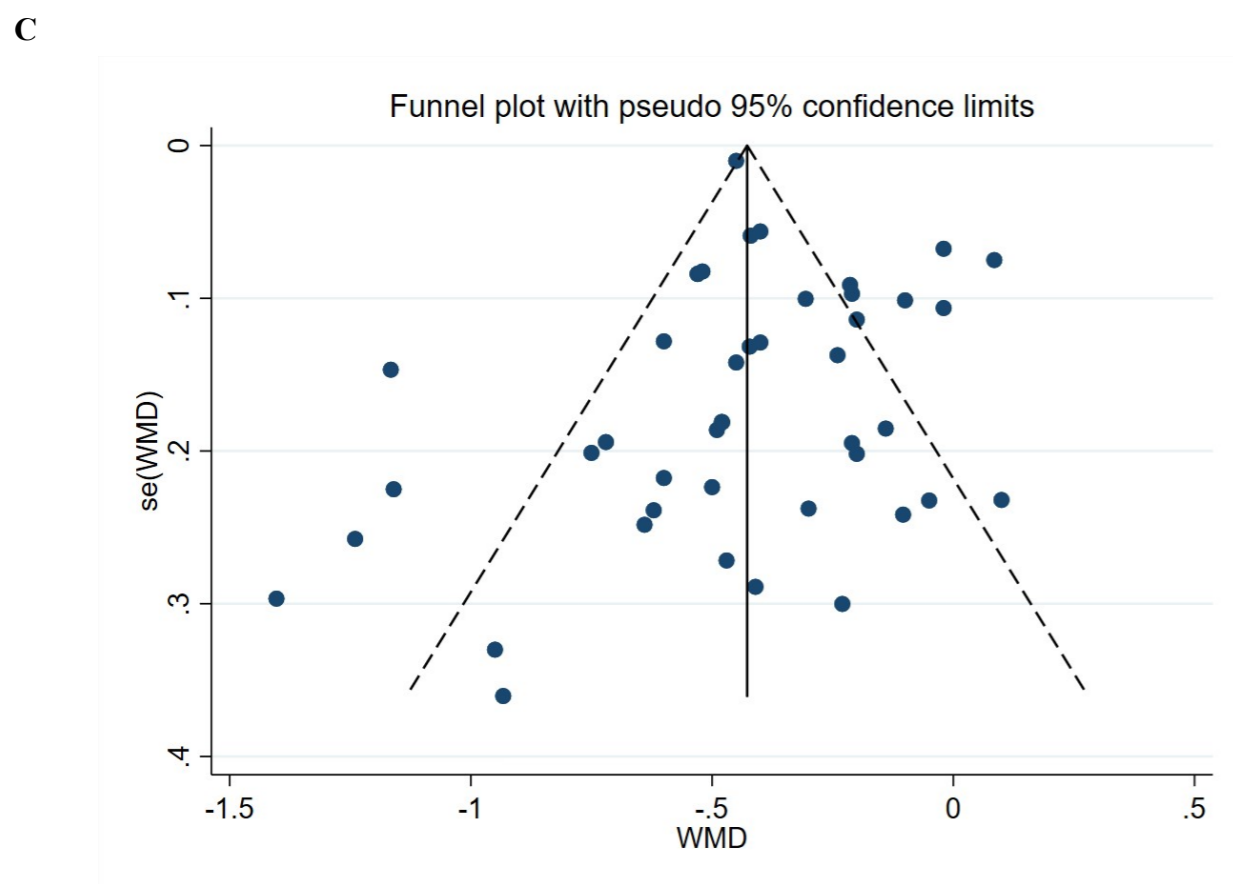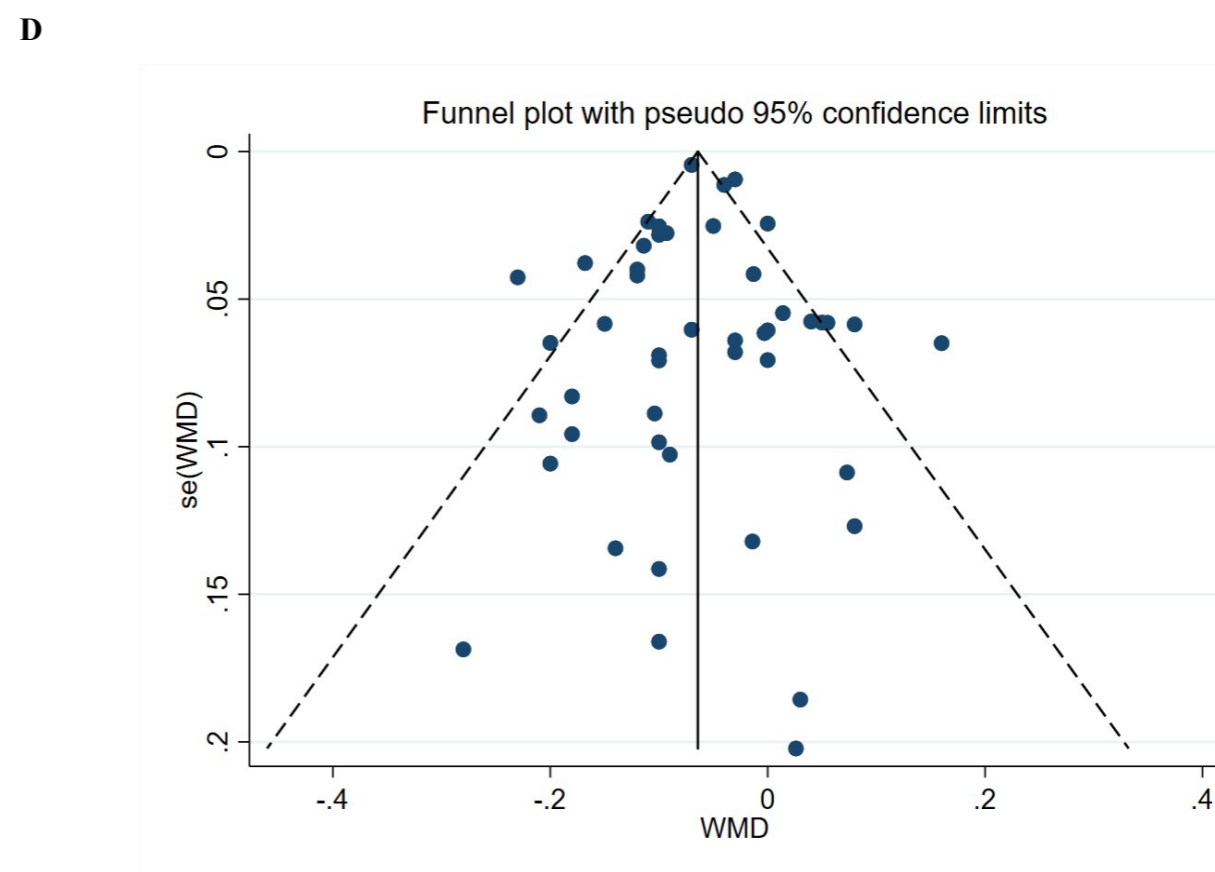

**E**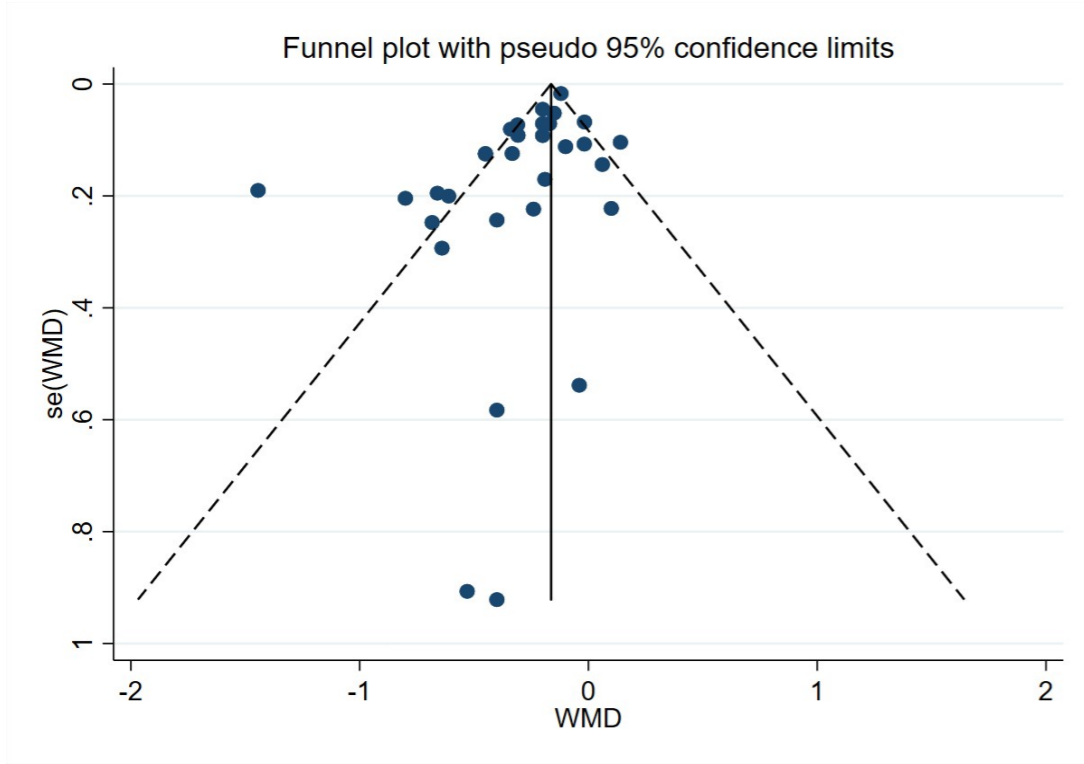**F**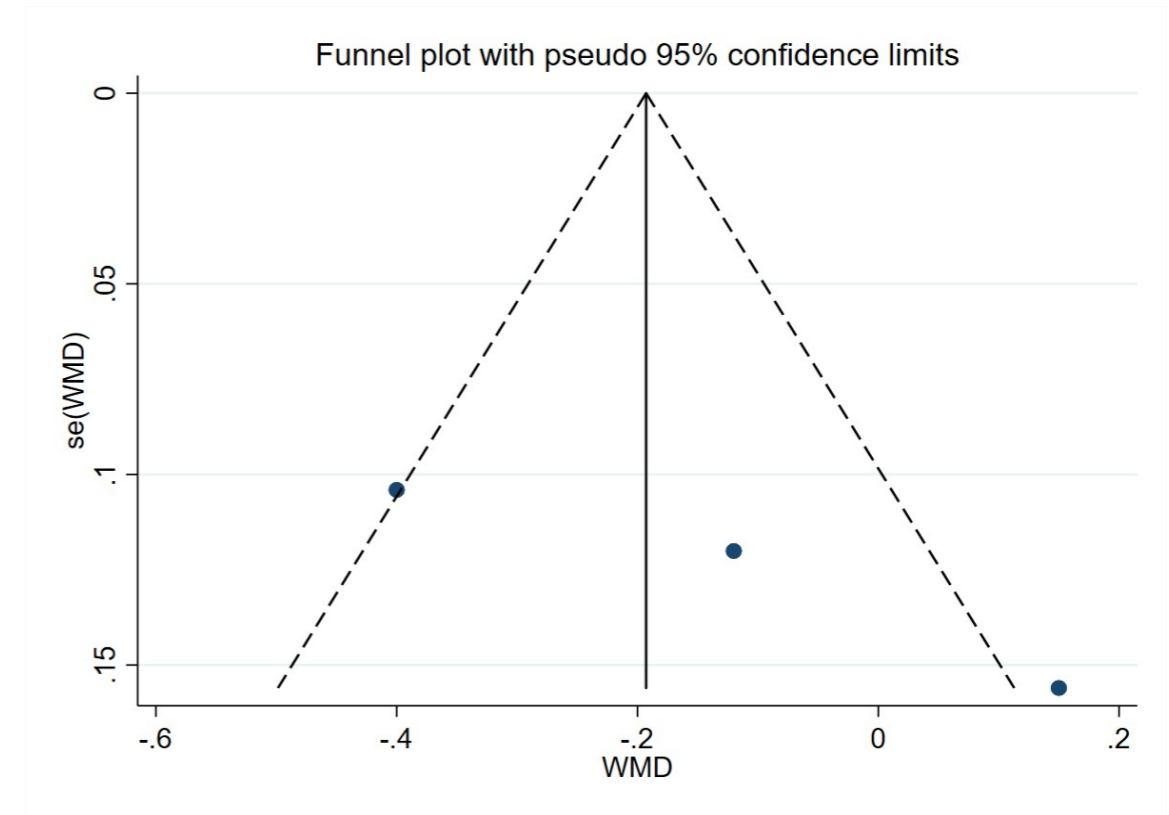**G**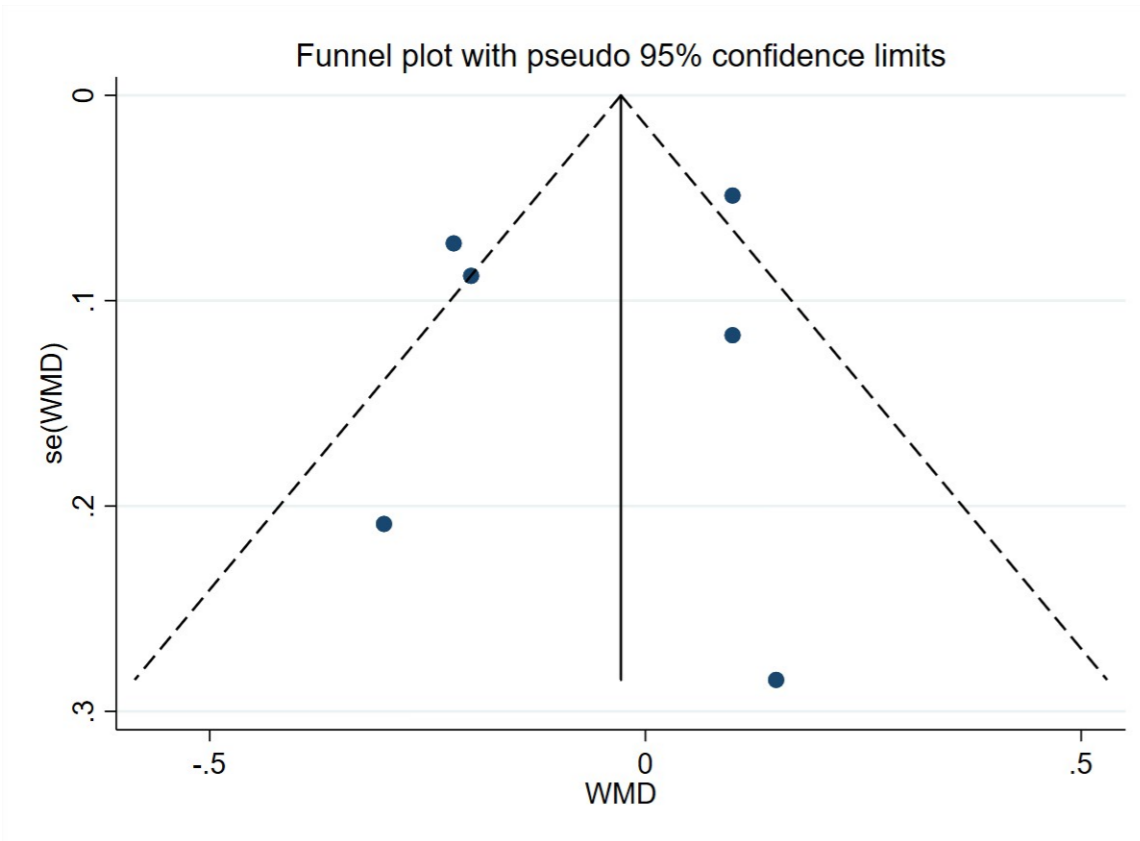**H**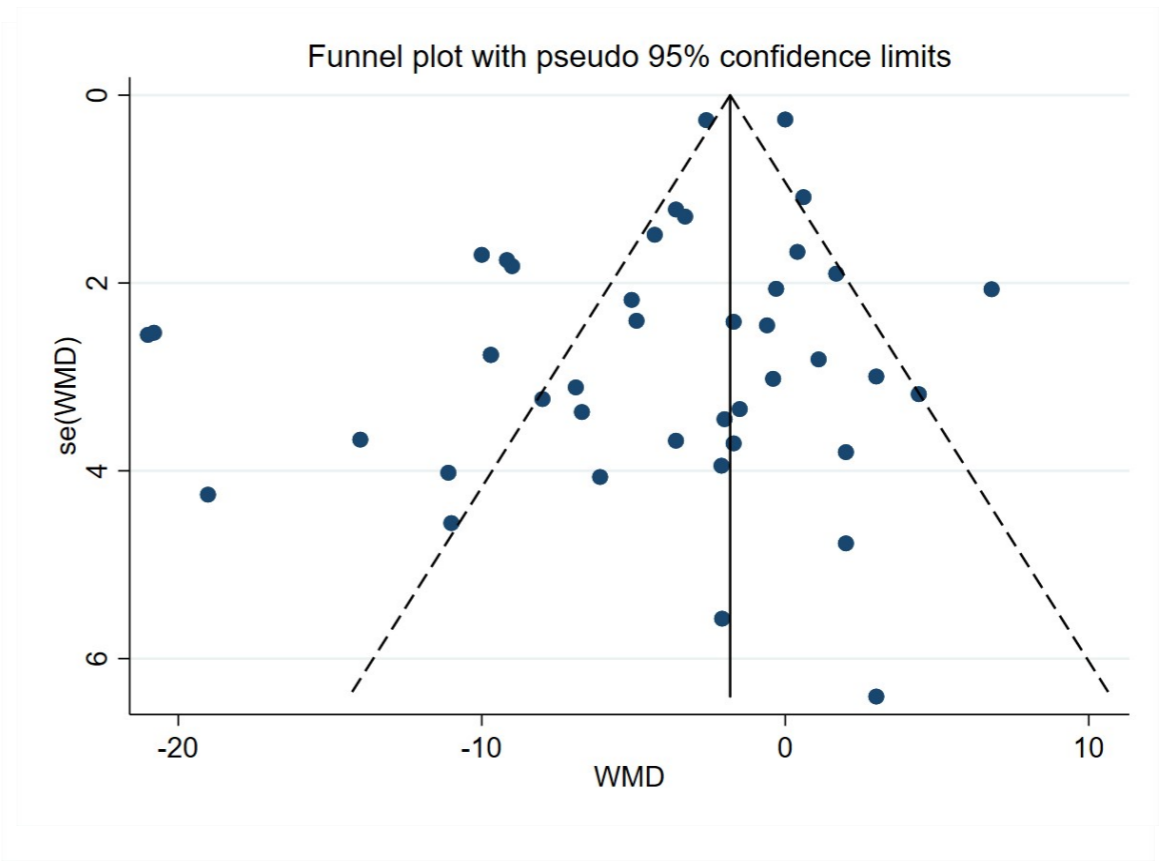

I

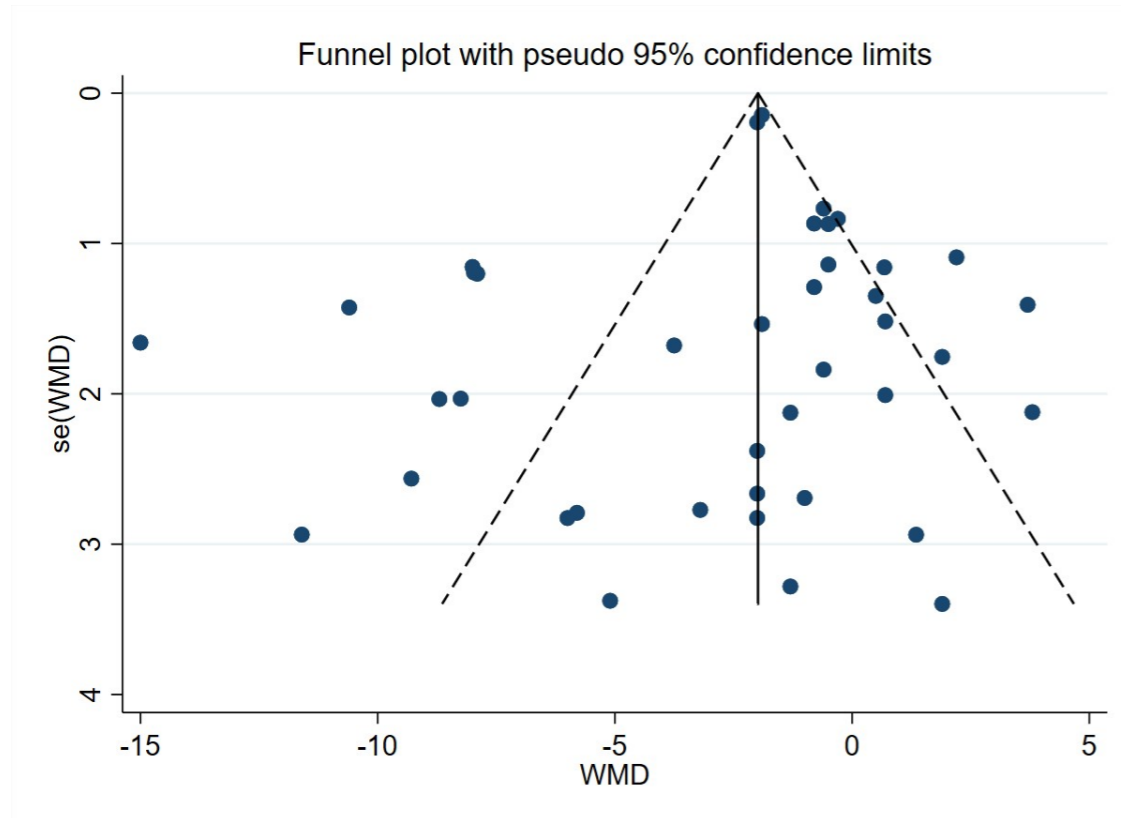

Figure A6. Funnel plots for the included observational studies.

A. TC: total cholesterol; B. TG: triglyceride; C. LDL-C: low-density lipoprotein-cholesterol; D. HDL-C: high-density lipoprotein-cholesterol; E. FBG: fasting blood glucose; F. HOMA-IR: homeostatic model assessment for insulin resistance; G. HbA1c: glycosylated hemoglobin; H. SBP: systolic blood pressure; I. DBP: diastolic blood pressure.
