# Supplementary material for: Effects of vegetarian diets on blood lipids, blood glucose, and blood pressure: a systematic review and meta-analysis
Source: Royal Society of Chemistry journal article supplement (doi:10.1039/d4fo03449j), 2024-01-01
Supplement: d4fo03449j1.pdf [file d4fo03449j1.pdf]

Supplementary information

Table S1. Subgroup analyses for the effects of the vegetarian diet on total cholesterol and total triglyceride (observational studies).

|                                |                              | TC, mmol/L |       |        |       |                 |                                                          |                               |                           | TG, mmol/L |       |        |        |                 |                                                          |                               |                           |
|--------------------------------|------------------------------|------------|-------|--------|-------|-----------------|----------------------------------------------------------|-------------------------------|---------------------------|------------|-------|--------|--------|-----------------|----------------------------------------------------------|-------------------------------|---------------------------|
| Group                          |                              | N          | WMD   | 95% CI |       | <i>p</i> -value | <i>p</i> -value for<br>between<br>group<br>heterogeneity | <i>p</i> for<br>heterogeneity | <i>I</i> <sup>2</sup> (%) | N          | WMD   | 95% CI |        | <i>p</i> -value | <i>p</i> -value for<br>between<br>group<br>heterogeneity | <i>p</i> for<br>heterogeneity | <i>I</i> <sup>2</sup> (%) |
|                                |                              |            |       | lower  | upper |                 |                                                          |                               |                           |            |       | lower  | upper  |                 |                                                          |                               |                           |
| Vegetarian<br>type             | vegan                        | 18         | -0.48 | -0.57  | -0.39 | < <b>0.001</b>  | 0.514                                                    | < 0.001                       | 81.7%                     | 16         | 0.01  | -0.07  | 0.08   | 0.821           | 0.030                                                    | 0.003                         | 56.6%                     |
|                                | lacto                        | 6          | -0.53 | -0.97  | -0.10 | <b>0.016</b>    |                                                          | < 0.001                       | 91.9%                     | 6          | -0.02 | -0.18  | 0.15   | 0.838           |                                                          | 0.021                         | 62.5%                     |
|                                | lacto-ovo                    | 20         | -0.52 | -0.63  | -0.41 | < <b>0.001</b>  |                                                          | < 0.001                       | 64.8%                     | 20         | -0.15 | -0.26  | -0.04  | <b>0.008</b>    |                                                          | < 0.001                       | 74.1%                     |
|                                | mixed                        | 11         | -0.66 | -0.88  | -0.44 | < <b>0.001</b>  |                                                          | < 0.001                       | 79.9%                     | 11         | -0.27 | -0.50  | -0.03  | <b>0.026</b>    |                                                          | < 0.001                       | 90.3%                     |
| Duration of<br>vegetarian diet | < 5 years                    | 19         | -0.48 | -0.61  | -0.35 | < <b>0.001</b>  | 0.191                                                    | < 0.001                       | 70.3%                     | 19         | 0.03  | -0.05  | 0.10   | 0.467           | 0.002                                                    | 0.002                         | 54.6%                     |
|                                | ≥ 5 years                    | 24         | -0.59 | -0.70  | -0.48 | < <b>0.001</b>  |                                                          | < 0.001                       | 75.9%                     | 24         | -0.16 | -0.26  | -0.07  | <b>0.001</b>    |                                                          | < 0.001                       | 84.1%                     |
| Health status                  | healthy                      | 49         | -0.58 | -0.66  | -0.50 | < <b>0.001</b>  | 0.002                                                    | < 0.001                       | 79.0%                     | 48         | -0.14 | -0.20  | -0.07  | < <b>0.001</b>  | 0.002                                                    | < 0.001                       | 80.2%                     |
|                                | chronic<br>diseases          | 6          | -0.40 | -0.48  | -0.31 | < <b>0.001</b>  |                                                          | 0.147                         | 38.8%                     | 5          | 0.10  | -0.04  | 0.24   | 0.145           |                                                          | 0.175                         | 37.0%                     |
| Region                         | Asia                         | 35         | -0.49 | -0.58  | -0.41 | < <b>0.001</b>  | 0.002                                                    | < 0.001                       | 79.8%                     | 36         | -0.07 | -0.14  | -0.003 | <b>0.042</b>    | 0.160                                                    | < 0.001                       | 81.7%                     |
|                                | Africa                       | 1          | -0.80 | -1.24  | -0.36 | < <b>0.001</b>  |                                                          | -                             | -                         | -          | -     | -      | -      | -               |                                                          | -                             |                           |
|                                | Europe                       | 10         | -0.44 | -0.54  | -0.34 | < <b>0.001</b>  |                                                          | 0.198                         | 26.7%                     | 8          | -0.19 | -0.32  | -0.05  | <b>0.006</b>    |                                                          | 0.122                         | 38.6%                     |
|                                | North<br>America             | 4          | -0.73 | -0.98  | -0.48 | < <b>0.001</b>  |                                                          | 0.663                         | 0                         | 4          | -0.18 | -0.40  | 0.03   | 0.096           |                                                          | 0.192                         | 36.7%                     |
|                                | Oceania                      | 1          | -1.30 | -1.87  | -0.72 | < <b>0.001</b>  |                                                          | -                             | -                         | 1          | -0.03 | -0.41  | 0.35   | 0.861           |                                                          | -                             | -                         |
|                                | South<br>America             | 4          | -1.07 | -1.56  | -0.58 | < <b>0.001</b>  |                                                          | 0.002                         | 80.3%                     | 4          | -0.35 | -0.61  | -0.10  | <b>0.007</b>    |                                                          | 0.086                         | 54.6%                     |
| Research type                  | case-<br>control<br>study    | 2          | -0.52 | -0.64  | -0.39 | < <b>0.001</b>  | 0.206                                                    | 0.323                         | 0                         | 2          | 0.28  | -0.38  | 0.94   | 0.407           | 0.384                                                    | 0.053                         | 73.2%                     |
|                                | cross-<br>sectional<br>study | 45         | -0.53 | -0.61  | -0.44 | < <b>0.001</b>  |                                                          | < 0.001                       | 77.7%                     | 44         | -0.13 | -0.22  | -0.05  | <b>0.001</b>    |                                                          | < 0.001                       | 73.4%                     |
|                                | cohort<br>study              | 8          | -0.73 | -0.94  | -0.51 | < <b>0.001</b>  |                                                          | < 0.001                       | 87.1%                     | 7          | -0.08 | -0.20  | 0.05   | 0.222           |                                                          | 0.001                         | 79.2%                     |

Abbreviations: TC: total cholesterol; TG: triglyceride; WMD: weighted mean difference; mixed: vegan, lacto, lacto-ovo or a combination of two; We defined “vegan diet” as a diet which excludes the consumption of any meat, fish, seafood, eggs, and dairy, “lacto vegetarian diet” as a diet which excludes the consumption of any meat, fish, seafood, and eggs, and “lacto-ovo vegetarian diet” as a diet which excludes the consumption of any meat, fish, and seafood. The mixed diet was a combination of these vegetarian subtypes.

Table S2. Subgroup analyses for the effects of the vegetarian diet on total cholesterol and total triglyceride (randomized controlled trials).

| TC, mmol/L                  |                   |    |         |        |       |                 |                                                 |                            |                           | TG, mmol/L |    |        |        |       |                 |                                                 |                            |                           |
|-----------------------------|-------------------|----|---------|--------|-------|-----------------|-------------------------------------------------|----------------------------|---------------------------|------------|----|--------|--------|-------|-----------------|-------------------------------------------------|----------------------------|---------------------------|
| Group                       |                   | N  | WMD     | 95% CI |       | <i>p</i> -value | <i>p</i> -value for between group heterogeneity | <i>p</i> for heterogeneity | <i>I</i> <sup>2</sup> (%) |            | N  | WMD    | 95% CI |       | <i>p</i> -value | <i>p</i> -value for between group heterogeneity | <i>p</i> for heterogeneity | <i>I</i> <sup>2</sup> (%) |
|                             |                   |    |         | lower  | upper |                 |                                                 |                            |                           |            |    |        | lower  | upper |                 |                                                 |                            |                           |
| Vegetarian type             | vegan             | 16 | -0.22   | -0.35  | -0.08 | <b>0.001</b>    | 0.190                                           | < 0.001                    | 78.3%                     |            | 16 | -0.001 | -0.10  | 0.10  | 0.984           | 0.900                                           | < 0.001                    | 76.7%                     |
|                             | lacto-ovo         | 1  | -0.52   | -0.95  | -0.09 | <b>0.018</b>    |                                                 | -                          | -                         |            | 1  | -0.02  | -0.23  | 0.20  | 0.882           |                                                 | -                          | -                         |
| Duration of vegetarian diet | < 12 weeks        | 3  | -0.33   | -0.63  | -0.02 | <b>0.038</b>    | 0.563                                           | 0.364                      | 0.9%                      |            | 2  | -0.02  | -0.20  | 0.17  | 0.876           | 0.895                                           | 0.983                      | 0                         |
|                             | ≥ 12 weeks        | 14 | -0.23   | -0.37  | -0.09 | <b>0.002</b>    |                                                 | < 0.001                    | 81.0%                     |            | 15 | -0.001 | -0.10  | 0.10  | 0.991           |                                                 | < 0.001                    | 78.3%                     |
| Health status               | healthy           | 2  | -0.53   | -0.82  | -0.24 | < <b>0.001</b>  | 0.041                                           | 0.942                      | 0                         |            | 2  | 0.08   | -0.11  | 0.27  | 0.422           | 0.398                                           | 0.210                      | 36.4%                     |
|                             | chronic diseases  | 15 | -0.19   | -0.33  | -0.06 | <b>0.005</b>    |                                                 | < 0.001                    | 77.4%                     |            | 15 | -0.02  | -0.12  | 0.09  | 0.771           |                                                 | < 0.001                    | 77.4%                     |
| Region                      | Asia              | 1  | < 0.001 | -0.57  | 0.57  | 1.000           | 0.071                                           | -                          | -                         |            | -  | -      | -      | -     | -               | -                                               | -                          | -                         |
|                             | Europe            | 3  | -0.71   | -1.16  | -0.25 | <b>0.002</b>    |                                                 | 0.276                      | 22.4%                     |            | 4  | -0.07  | -0.22  | 0.08  | 0.362           | 0.936                                           | 0                          |                           |
|                             | North America     | 12 | -0.17   | -0.31  | -0.04 | <b>0.014</b>    |                                                 | < 0.001                    | 78.7%                     |            | 12 | -0.004 | -0.12  | 0.11  | 0.945           | < 0.001                                         | 81.6%                      |                           |
|                             | Oceania           | 1  | -0.40   | -0.68  | -0.12 | <b>0.004</b>    |                                                 | -                          | -                         |            | 1  | 0.20   | -0.01  | 0.41  | 0.064           | -                                               | -                          |                           |
| Research type               | parallel design   | 13 | -0.21   | -0.35  | -0.06 | <b>0.005</b>    | 0.299                                           | < 0.001                    | 80.3%                     |            | 14 | -0.04  | -0.14  | 0.07  | 0.489           | 0.097                                           | < 0.001                    | 77.4%                     |
|                             | cross-over design | 4  | -0.35   | -0.59  | -0.17 | <b>0.003</b>    |                                                 | 0.330                      | 12.4%                     |            | 3  | 0.14   | -0.04  | 0.32  | 0.129           |                                                 | 0.177                      | 42.2%                     |

Abbreviations: TC: total cholesterol; TG: triglyceride; WMD: weighted mean difference; We defined “vegan diet” as a diet which excludes the consumption of any meat, fish, seafood, eggs, and dairy, and “lacto-ovo vegetarian diet” as a diet which excludes the consumption of any meat, fish, and seafood.

Table S3. Subgroup analyses for the effects of the vegetarian diet on low-density lipoprotein and high-density lipoprotein (observational studies).

| LDL-C, mmol/L                  |                              |       |       |        |                |                 |                                                          |                               |                           | HDL-C, mmol/L |       |       |        |                |                 |                                                          |                               |                           |
|--------------------------------|------------------------------|-------|-------|--------|----------------|-----------------|----------------------------------------------------------|-------------------------------|---------------------------|---------------|-------|-------|--------|----------------|-----------------|----------------------------------------------------------|-------------------------------|---------------------------|
| Group                          |                              | N     | WMD   | 95% CI |                | <i>p</i> -value | <i>p</i> -value for<br>between<br>group<br>heterogeneity | <i>p</i> for<br>heterogeneity | <i>I</i> <sup>2</sup> (%) |               | N     | WMD   | 95% CI |                | <i>p</i> -value | <i>p</i> -value for<br>between<br>group<br>heterogeneity | <i>p</i> for<br>heterogeneity | <i>I</i> <sup>2</sup> (%) |
|                                |                              |       |       | lower  | upper          |                 |                                                          |                               |                           |               |       |       | lower  | upper          |                 |                                                          |                               |                           |
| Vegetarian<br>type             |                              |       |       |        |                |                 |                                                          |                               |                           |               |       |       |        |                |                 |                                                          |                               |                           |
|                                | vegan                        | 13    | -0.37 | -0.54  | -0.20          | < <b>0.001</b>  | 0.875                                                    | < 0.001                       | 84.5%                     |               | 14    | -0.08 | -0.11  | -0.05          | < <b>0.001</b>  | 0.548                                                    | 0.120                         | 31.9%                     |
|                                | lacto                        | 6     | -0.50 | -0.88  | -0.12          | <b>0.009</b>    |                                                          | < 0.001                       | 91.0%                     |               | 6     | -0.09 | -0.12  | -0.06          | < <b>0.001</b>  |                                                          | 0.543                         | 0                         |
|                                | lacto-ovo                    | 16    | -0.41 | -0.51  | -0.30          | < <b>0.001</b>  |                                                          | 0.004                         | 55.0%                     |               | 20    | -0.06 | -0.09  | -0.03          | < <b>0.001</b>  |                                                          | < 0.001                       | 67.6%                     |
| mixed                          | 9                            | -0.46 | -0.65 | -0.26  | < <b>0.001</b> | < 0.001         |                                                          | 82.1%                         |                           | 9             | -0.06 | -0.13 | 0.003  | 0.061          | < 0.001         |                                                          | 74.5%                         |                           |
| Duration of<br>vegetarian diet |                              |       |       |        |                |                 |                                                          |                               |                           |               |       |       |        |                |                 |                                                          |                               |                           |
|                                | < 5 years                    | 16    | -0.33 | -0.46  | -0.19          | < <b>0.001</b>  | 0.139                                                    | < 0.001                       | 78.1%                     |               | 19    | -0.07 | -0.10  | -0.04          | < <b>0.001</b>  | 0.703                                                    | < 0.001                       | 63.0%                     |
| ≥ 5 years                      | 21                           | -0.45 | -0.53 | -0.36  | < <b>0.001</b> | < 0.001         |                                                          | 66.6%                         |                           | 21            | -0.08 | -0.11 | -0.05  | < <b>0.001</b> | 0.001           |                                                          | 57.6%                         |                           |
| Health status                  |                              |       |       |        |                |                 |                                                          |                               |                           |               |       |       |        |                |                 |                                                          |                               |                           |
|                                | healthy                      | 40    | -0.44 | -0.52  | -0.36          | < <b>0.001</b>  | 0.037                                                    | < 0.001                       | 79.8%                     |               | 45    | -0.06 | -0.08  | -0.05          | < <b>0.001</b>  | 0.076                                                    | < 0.001                       | 59.2%                     |
| chronic<br>diseases            | 4                            | -0.18 | -0.41 | 0.04   | 0.113          | 0.002           |                                                          | 80.4%                         |                           | 4             | -0.15 | -0.23 | -0.06  | <b>0.001</b>   | 0.081           |                                                          | 55.5%                         |                           |
| Region                         |                              |       |       |        |                |                 |                                                          |                               |                           |               |       |       |        |                |                 |                                                          |                               |                           |
|                                | Asia                         | 27    | -0.34 | -0.42  | -0.26          | < <b>0.001</b>  | 0.019                                                    | < 0.001                       | 84.5%                     |               | 28    | -0.10 | -0.12  | -0.08          | < <b>0.001</b>  | < 0.001                                                  | 0.008                         | 43.7%                     |
|                                | Europe                       | 8     | -0.39 | -0.57  | -0.20          | < <b>0.001</b>  |                                                          | 0.155                         | 34.2%                     |               | 12    | -0.02 | -0.05  | 0.01           | 0.198           |                                                          | 0.016                         | 52.8%                     |
|                                | North<br>America             | 4     | -0.58 | -0.80  | -0.35          | < <b>0.001</b>  |                                                          | 0.626                         | 0                         |               | 4     | -0.08 | -0.23  | 0.06           | 0.260           |                                                          | 0.080                         | 55.5%                     |
|                                | Oceania                      | 1     | -0.93 | -1.64  | -0.23          | <b>0.010</b>    |                                                          | -                             | -                         |               | 1     | -0.10 | -0.28  | 0.07           | 0.241           |                                                          | -                             | -                         |
| South<br>America               | 4                            | -0.89 | -1.31 | -0.47  | < <b>0.001</b> | 0.004           |                                                          | 77.7%                         |                           | 4             | -0.01 | -0.07 | 0.05   | 0.722          | 0.411           |                                                          | 0                             |                           |
| Research type                  |                              |       |       |        |                |                 |                                                          |                               |                           |               |       |       |        |                |                 |                                                          |                               |                           |
|                                | case-<br>control<br>study    | 2     | -0.34 | -0.59  | -0.08          | <b>0.009</b>    | 0.024                                                    | 0.150                         | 51.8%                     |               | 2     | -0.10 | -0.15  | -0.05          | < <b>0.001</b>  | 0.499                                                    | 0.925                         | 0                         |
|                                | cross-<br>sectional<br>study | 36    | -0.37 | -0.45  | -0.28          | < <b>0.001</b>  |                                                          | < 0.001                       | 73.2%                     |               | 40    | -0.07 | -0.09  | -0.04          | < <b>0.001</b>  |                                                          | < 0.001                       | 63.4%                     |
|                                | cohort<br>study              | 6     | -0.80 | -1.11  | -0.50          | < <b>0.001</b>  |                                                          | < 0.001                       | 90.4%                     |               | 7     | -0.08 | -0.11  | -0.04          | < <b>0.001</b>  |                                                          | 0.083                         | 46.3%                     |

Abbreviations: LDL-C: low-density lipoprotein-cholesterol; HDL-C: high-density lipoprotein-cholesterol; WMD: weighted mean difference; mixed: vegan, lacto, lacto-ovo or a combination of two; We defined “vegan diet” as a diet which excludes the consumption of any meat, fish, seafood, eggs, and dairy, “lacto vegetarian diet” as a diet which excludes the consumption of any meat, fish, seafood, and eggs, and “lacto-ovo vegetarian diet” as a diet which excludes the consumption of any meat, fish, and seafood. The mixed diet was a combination of these vegetarian subtypes.

Table S4. Subgroup analyses for the effects of the vegetarian diet on low-density lipoprotein and high-density lipoprotein (randomized controlled trials).

| LDL-C, mmol/L               |                   |    |       |        |       |                 |                                                 |                            |                           | HDL-C, mmol/L |    |       |        |       |                 |                                                 |                            |                           |
|-----------------------------|-------------------|----|-------|--------|-------|-----------------|-------------------------------------------------|----------------------------|---------------------------|---------------|----|-------|--------|-------|-----------------|-------------------------------------------------|----------------------------|---------------------------|
| Group                       |                   | N  | WMD   | 95% CI |       | <i>p</i> -value | <i>p</i> -value for between group heterogeneity | <i>p</i> for heterogeneity | <i>I</i> <sup>2</sup> (%) |               | N  | WMD   | 95% CI |       | <i>p</i> -value | <i>p</i> -value for between group heterogeneity | <i>p</i> for heterogeneity | <i>I</i> <sup>2</sup> (%) |
|                             |                   |    |       | lower  | upper |                 |                                                 |                            |                           |               |    |       | lower  | upper |                 |                                                 |                            |                           |
| Vegetarian type             |                   |    |       |        |       |                 |                                                 |                            |                           |               |    |       |        |       |                 |                                                 |                            |                           |
|                             | vegan             | 14 | -0.24 | -0.38  | -0.10 | < <b>0.001</b>  | 0.401                                           | < 0.001                    | 70.9%                     |               | 17 | -0.07 | -0.11  | -0.04 | < <b>0.001</b>  | 0.749                                           | < 0.001                    | 70.5%                     |
|                             | lacto-ovo         | 1  | -0.41 | -0.80  | -0.03 | <b>0.034</b>    |                                                 | -                          | -                         |               | 1  | -0.10 | -0.23  | 0.04  | 0.169           |                                                 | -                          | -                         |
| Duration of vegetarian diet |                   |    |       |        |       |                 |                                                 |                            |                           |               |    |       |        |       |                 |                                                 |                            |                           |
|                             | < 12 weeks        | 2  | -0.39 | -0.72  | -0.06 | <b>0.021</b>    | 0.416                                           | 0.787                      | 0                         |               | 3  | -0.04 | -0.16  | 0.09  | 0.546           | 0.555                                           | 0.297                      | 17.6%                     |
|                             | ≥ 12 weeks        | 13 | -0.24 | -0.38  | -0.10 | <b>0.001</b>    |                                                 | < 0.001                    | 72.9%                     |               | 15 | -0.08 | -0.12  | -0.04 | < <b>0.001</b>  |                                                 | < 0.001                    | 73.4%                     |
| Health status               |                   |    |       |        |       |                 |                                                 |                            |                           |               |    |       |        |       |                 |                                                 |                            |                           |
|                             | healthy           | 2  | -0.35 | -0.59  | -0.10 | <b>0.006</b>    | 0.446                                           | 0.655                      | 0                         |               | 2  | -0.14 | -0.24  | -0.04 | <b>0.007</b>    | 0.182                                           | 0.325                      | 0                         |
|                             | chronic diseases  | 13 | -0.24 | -0.38  | -0.10 | <b>0.001</b>    |                                                 | < 0.001                    | 72.1%                     |               | 16 | -0.07 | -0.11  | -0.03 | <b>0.001</b>    |                                                 | < 0.001                    | 69.8%                     |
| Region                      |                   |    |       |        |       |                 |                                                 |                            |                           |               |    |       |        |       |                 |                                                 |                            |                           |
|                             | Asia              | -  | -     | -      | -     | -               |                                                 | -                          | -                         |               | 1  | 0.10  | -0.11  | 0.31  | 0.353           |                                                 | -                          | -                         |
|                             | Europe            | 4  | -0.51 | -0.98  | 0.04  | <b>0.035</b>    |                                                 | 0.035                      | 65.2%                     |               | 4  | -0.07 | -0.18  | 0.04  | 0.196           |                                                 | 0.309                      | 16.5%                     |
|                             | North America     | 10 | -0.18 | -0.31  | -0.05 | <b>0.006</b>    | 0.143                                           | 0.003                      | 63.8%                     |               | 12 | -0.06 | -0.10  | -0.03 | <b>0.001</b>    | 0.004                                           | < 0.001                    | 64.0%                     |
|                             | Oceania           | 1  | -0.40 | -0.63  | -0.17 | <b>0.001</b>    |                                                 | -                          | -                         |               | 1  | -0.20 | -0.28  | -0.12 | < <b>0.001</b>  |                                                 | -                          | -                         |
| Research type               |                   |    |       |        |       |                 |                                                 |                            |                           |               |    |       |        |       |                 |                                                 |                            |                           |
|                             | parallel design   | 12 | -0.23 | -0.39  | -0.08 | <b>0.003</b>    | 0.438                                           | < 0.001                    | 72.9%                     |               | 14 | -0.07 | -0.11  | -0.03 | < <b>0.001</b>  | 0.589                                           | < 0.001                    | 70.4%                     |
|                             | cross-over design | 3  | -0.33 | -0.51  | -0.14 | < <b>0.001</b>  |                                                 | 0.876                      | 0                         |               | 4  | -0.09 | -0.18  | -0.01 | <b>0.029</b>    |                                                 | 0.169                      | 40.5%                     |

Abbreviations: LDL-C: low-density lipoprotein-cholesterol; HDL-C: high-density lipoprotein-cholesterol; WMD: weighted mean difference; We defined “vegan diet” as a diet which excludes the consumption of any meat, fish, seafood, eggs, and dairy, and “lacto-ovo vegetarian diet” as a diet which excludes the consumption of any meat, fish, and seafood.

Table S5. Subgroup analyses for the effects of the vegetarian diet on fasting blood glucose (observational studies).

|                             |                       | fasting blood glucose, mmol/L |       |        |       |                   |                                                       |                            |                           |
|-----------------------------|-----------------------|-------------------------------|-------|--------|-------|-------------------|-------------------------------------------------------|----------------------------|---------------------------|
| Group                       |                       | N                             | WMD   | 95% CI |       | <i>p</i> -value   | <i>p</i> -value for<br>between group<br>heterogeneity | <i>p</i> for heterogeneity | <i>I</i> <sup>2</sup> (%) |
|                             |                       |                               |       | lower  | upper |                   |                                                       |                            |                           |
| Vegetarian type             |                       |                               |       |        |       |                   |                                                       |                            |                           |
|                             | vegan                 | 13                            | -0.19 | -0.34  | -0.04 | <b>0.015</b>      | 0.304                                                 | 0.002                      | 62.0%                     |
|                             | lacto                 | 2                             | -0.18 | -0.49  | 0.14  | 0.277             |                                                       | 0.002                      | 89.3%                     |
|                             | lacto-ovo             | 10                            | -0.25 | -0.34  | -0.16 | <b>&lt; 0.001</b> |                                                       | 0.048                      | 47.1%                     |
|                             | mixed                 | 6                             | -0.44 | -0.66  | -0.22 | <b>&lt; 0.001</b> |                                                       | < 0.001                    | 89.2%                     |
| Duration of vegetarian diet |                       |                               |       |        |       |                   |                                                       |                            |                           |
|                             | < 5 years             | 14                            | -0.19 | -0.30  | -0.07 | <b>0.001</b>      | 0.037                                                 | 0.001                      | 63.2%                     |
|                             | ≥ 5 years             | 13                            | -0.36 | -0.48  | -0.24 | <b>&lt; 0.001</b> |                                                       | < 0.001                    | 85.2%                     |
| Health status               |                       |                               |       |        |       |                   |                                                       |                            |                           |
|                             | healthy               | 28                            | -0.26 | -0.33  | -0.18 | <b>&lt; 0.001</b> | 0.501                                                 | < 0.001                    | 77.2%                     |
|                             | chronic diseases      | 3                             | -0.37 | -0.70  | -0.05 | <b>0.025</b>      |                                                       | 0.049                      | 66.9%                     |
| Region                      |                       |                               |       |        |       |                   |                                                       |                            |                           |
|                             | Asia                  | 21                            | -0.19 | -0.25  | -0.13 | <b>&lt; 0.001</b> | 0.052                                                 | < 0.001                    | 63.1%                     |
|                             | Africa                | 1                             | -0.40 | -2.21  | 1.41  | 0.664             |                                                       | -                          | -                         |
|                             | Europe                | 3                             | -0.20 | -0.72  | 0.33  | 0.460             |                                                       | 0.129                      | 51.2%                     |
|                             | North America         | 3                             | -0.45 | -0.69  | -0.21 | <b>&lt; 0.001</b> |                                                       | 0.992                      | 0                         |
|                             | South America         | 3                             | -0.89 | -1.49  | -0.29 | <b>0.004</b>      |                                                       | < 0.001                    | 89.5%                     |
| Research type               |                       |                               |       |        |       |                   |                                                       |                            |                           |
|                             | case-control study    | 1                             | -0.17 | -0.31  | -0.03 | <b>0.016</b>      | 0.217                                                 | -                          | -                         |
|                             | cross-sectional study | 26                            | -0.25 | -0.33  | -0.17 | <b>&lt; 0.001</b> |                                                       | < 0.001                    | 62.9%                     |
|                             | cohort study          | 4                             | -0.46 | -0.76  | -0.16 | <b>0.003</b>      |                                                       | < 0.001                    | 93.8%                     |

Abbreviations: WMD: weighted mean difference; mixed: vegan, lacto, lacto-ovo or a combination of two; We defined “vegan diet” as a diet which excludes the consumption of any meat, fish, seafood, eggs, and dairy, “lacto vegetarian diet” as a diet which excludes the consumption of any meat, fish, seafood, and eggs, and “lacto-ovo vegetarian diet” as a diet which excludes the consumption of any meat, fish, and seafood. The mixed diet was a combination of these vegetarian subtypes.

Table S6. Subgroup analyses for the effects of the vegetarian diet on fasting blood glucose (randomized controlled trials).

| fasting blood glucose, mmol/L |                   |   |       |        |       |                 |                                                       |                            |                           |
|-------------------------------|-------------------|---|-------|--------|-------|-----------------|-------------------------------------------------------|----------------------------|---------------------------|
| Group                         |                   | N | WMD   | 95% CI |       | <i>p</i> -value | <i>p</i> -value for<br>between group<br>heterogeneity | <i>p</i> for heterogeneity | <i>I</i> <sup>2</sup> (%) |
|                               |                   |   |       | lower  | upper |                 |                                                       |                            |                           |
| Vegetarian type               |                   |   |       |        |       |                 |                                                       |                            |                           |
|                               | vegan             | 9 | -0.36 | -0.49  | -0.24 | < <b>0.001</b>  | 0.265                                                 | 0.354                      | 9.7%                      |
|                               | lacto-ovo         | 2 | -0.18 | -0.47  | 0.11  | 0.222           |                                                       | 0.427                      | 0                         |
| Duration of vegetarian diet   |                   |   |       |        |       |                 |                                                       |                            |                           |
|                               | < 12 weeks        | 3 | -0.21 | -0.46  | 0.05  | 0.115           | 0.324                                                 | 0.687                      | 0                         |
|                               | ≥ 12 weeks        | 8 | -0.35 | -0.50  | -0.21 | < <b>0.001</b>  |                                                       | 0.271                      | 20.1%                     |
| Health status                 |                   |   |       |        |       |                 |                                                       |                            |                           |
|                               | healthy           | 2 | -0.18 | -0.47  | 0.11  | 0.222           | 0.265                                                 | 0.427                      | 0                         |
|                               | chronic diseases  | 9 | -0.36 | -0.49  | -0.24 | < <b>0.001</b>  |                                                       | 0.354                      | 9.7%                      |
| Region                        |                   |   |       |        |       |                 |                                                       |                            |                           |
|                               | Europe            | 2 | -0.03 | -0.51  | 0.45  | 0.908           | 0.352                                                 | 0.183                      | 43.6%                     |
|                               | North America     | 8 | -0.38 | -0.48  | -0.28 | < <b>0.001</b>  |                                                       | 0.605                      | 0                         |
|                               | Oceania           | 1 | -0.52 | -1.41  | 0.37  | 0.250           |                                                       | -                          | -                         |
| Research type                 |                   |   |       |        |       |                 |                                                       |                            |                           |
|                               | parallel design   | 9 | -0.36 | -0.50  | -0.22 | < <b>0.001</b>  | 0.362                                                 | 0.346                      | 10.6%                     |
|                               | cross-over design | 2 | -0.24 | -0.47  | -0.01 | <b>0.045</b>    |                                                       | 0.355                      | 0                         |

Abbreviations: WMD: weighted mean difference; We defined “vegan diet” as a diet which excludes the consumption of any meat, fish, seafood, eggs, and dairy, and “lacto-ovo vegetarian diet” as a diet which excludes the consumption of any meat, fish, and seafood.

Table S7. Subgroup analyses for the effects of the vegetarian diet on HbA1c (observational studies).

|                             |                  | HbA1c, % |       |        |       |                   |                                                       |                            |                           |
|-----------------------------|------------------|----------|-------|--------|-------|-------------------|-------------------------------------------------------|----------------------------|---------------------------|
| Group                       |                  | N        | WMD   | 95% CI |       | <i>p</i> -value   | <i>p</i> -value for<br>between group<br>heterogeneity | <i>p</i> for heterogeneity | <i>I</i> <sup>2</sup> (%) |
|                             |                  |          |       | lower  | upper |                   |                                                       |                            |                           |
| Vegetarian type             |                  |          |       |        |       |                   |                                                       |                            |                           |
|                             | vegan            | 1        | 0.15  | -0.41  | 0.71  | 0.598             | 0.052                                                 | -                          | -                         |
|                             | lacto            | 1        | 0.10  | 0.004  | 0.20  | <b>0.040</b>      |                                                       | -                          | -                         |
|                             | lacto-ovo        | 1        | -0.30 | -0.71  | 0.11  | 0.151             |                                                       | -                          | -                         |
|                             | mixed            | 3        | -0.13 | -0.30  | 0.05  | 0.160             |                                                       | 0.054                      | 65.7%                     |
| Duration of vegetarian diet |                  |          |       |        |       |                   |                                                       |                            |                           |
|                             | < 5 years        | 4        | -0.21 | -0.31  | -0.10 | <b>&lt; 0.001</b> | 0.017                                                 | 0.613                      | 0                         |
|                             | ≥ 5 years        | 1        | 0.10  | -0.13  | 0.33  | 0.392             |                                                       | -                          | -                         |
| Health status               |                  |          |       |        |       |                   |                                                       |                            |                           |
|                             | healthy          | 4        | -0.07 | -0.29  | 0.14  | 0.491             | 0.959                                                 | < 0.001                    | 83.5%                     |
|                             | chronic diseases | 2        | -0.06 | -0.45  | 0.32  | 0.750             |                                                       | 0.094                      | 64.2%                     |
| Region                      |                  |          |       |        |       |                   |                                                       |                            |                           |
|                             | Asia             | 3        | 0.05  | -0.11  | 0.21  | 0.550             | 0.048                                                 | 0.173                      | 43.0%                     |
|                             | Europe           | 1        | 0.15  | -0.41  | 0.71  | 0.598             |                                                       | -                          | -                         |
|                             | North America    | 1        | -0.22 | -0.36  | -0.08 | <b>0.002</b>      |                                                       | -                          | -                         |
|                             | South America    | 1        | -0.20 | -0.37  | -0.03 | <b>0.023</b>      |                                                       | -                          | -                         |

Abbreviations: HbA1c: glycosylated hemoglobin; WMD: weighted mean difference; mixed: vegan, lacto, lacto-ovo or a combination of two; We defined “vegan diet” as a diet which excludes the consumption of any meat, fish, seafood, eggs, and dairy, “lacto vegetarian diet” as a diet which excludes the consumption of any meat, fish, seafood, and eggs, and “lacto-ovo vegetarian diet” as a diet which excludes the consumption of any meat, fish, and seafood. The mixed diet was a combination of these vegetarian subtypes.

Table S8. Subgroup analyses for the effects of the vegetarian diet on HbA1c (randomized controlled trials).

|                             |                   | HbA1c, %     |       |             |       |                 |                                                       |                            |                           |
|-----------------------------|-------------------|--------------|-------|-------------|-------|-----------------|-------------------------------------------------------|----------------------------|---------------------------|
| Group                       |                   | N            | WMD   | 95% CI      |       | <i>p</i> -value | <i>p</i> -value for<br>between group<br>heterogeneity | <i>p</i> for heterogeneity | <i>I</i> <sup>2</sup> (%) |
|                             |                   |              |       | lower       | upper |                 |                                                       |                            |                           |
| Duration of vegetarian diet |                   |              |       |             |       |                 |                                                       |                            |                           |
|                             | < 12 weeks        | 3            | -0.18 | -0.90       | 0.55  | 0.639           | 0.940                                                 | 0.973                      | 0                         |
|                             | ≥ 12 weeks        | 9            | -0.15 | -0.28       | -0.01 | <b>0.034</b>    |                                                       | 0.255                      | 21.2%                     |
| Region                      |                   |              |       |             |       |                 |                                                       |                            |                           |
|                             | Asia              | 1            | -0.10 | -1.10       | 0.90  | 0.845           | 0.969                                                 | -                          | -                         |
|                             | Europe            | 3            | -0.20 | -1.01       | 0.60  | 0.619           |                                                       | 0.984                      | 0                         |
|                             | North America     | 7            | -0.17 | -0.33       | -0.01 | <b>0.043</b>    |                                                       | 0.133                      | 38.8%                     |
|                             | Oceania           | 1            | -0.45 | -1.62       | 0.72  | 0.450           |                                                       | -                          | -                         |
| Research type               |                   |              |       |             |       |                 |                                                       |                            |                           |
|                             | parallel design   | 9            | -0.23 | -0.44       | -0.01 | <b>0.041</b>    | 0.424                                                 | 0.263                      | 20.3%                     |
|                             | cross-over design | 3            | -0.12 | -0.26       | 0.02  | 0.083           |                                                       | 0.967                      | 0                         |
| Abbreviations:              | HbA1c:            | glycosylated |       | hemoglobin; |       | WMD:            | weighted                                              | mean                       | difference.               |



Table S9. Subgroup analyses for the effects of the vegetarian diet on blood pressure (observational studies).

| SBP, mmHg                      |                              |    |        |        |       |                   |                                                          |                               |                           | DBP, mmHg |    |        |        |       |                   |                                                          |                               |                           |
|--------------------------------|------------------------------|----|--------|--------|-------|-------------------|----------------------------------------------------------|-------------------------------|---------------------------|-----------|----|--------|--------|-------|-------------------|----------------------------------------------------------|-------------------------------|---------------------------|
| Group                          |                              | N  | WMD    | 95% CI |       | <i>p</i> -value   | <i>p</i> -value for<br>between<br>group<br>heterogeneity | <i>p</i> for<br>heterogeneity | <i>I</i> <sup>2</sup> (%) |           | N  | WMD    | 95% CI |       | <i>p</i> -value   | <i>p</i> -value for<br>between<br>group<br>heterogeneity | <i>p</i> for<br>heterogeneity | <i>I</i> <sup>2</sup> (%) |
|                                |                              |    |        | lower  | upper |                   |                                                          |                               |                           |           |    |        | lower  | upper |                   |                                                          |                               |                           |
| Vegetarian<br>type             | vegan                        | 13 | -0.83  | -2.55  | 0.89  | 0.346             | 0.008                                                    | < 0.001                       | 83.9%                     |           | 12 | -0.60  | -1.46  | 0.27  | 0.175             | 0.011                                                    | < 0.001                       | 72.2%                     |
|                                | lacto                        | 6  | -5.31  | -10.38 | -0.24 | <b>0.040</b>      |                                                          | < 0.001                       | 85.9%                     |           | 6  | -2.83  | -6.73  | 1.07  | 0.155             |                                                          | < 0.001                       | 87.2%                     |
|                                | lacto-ovo                    | 15 | -6.11  | -9.21  | -3.01 | <b>&lt; 0.001</b> |                                                          | < 0.001                       | 85.6%                     |           | 15 | -3.90  | -6.04  | -1.77 | <b>&lt; 0.001</b> |                                                          | < 0.001                       | 88.0%                     |
|                                | mixed                        | 8  | -5.87  | -10.83 | -0.91 | <b>0.020</b>      |                                                          | < 0.001                       | 88.9%                     |           | 7  | -4.66  | -9.03  | -0.30 | <b>0.036</b>      |                                                          | < 0.001                       | 92.9%                     |
| Duration of<br>vegetarian diet | < 5 years                    | 15 | -3.66  | -6.59  | -0.73 | <b>0.014</b>      | 0.608                                                    | < 0.001                       | 77.8%                     |           | 14 | -1.61  | -3.42  | 0.19  | 0.080             | 0.222                                                    | < 0.001                       | 77.2%                     |
|                                | ≥ 5 years                    | 18 | -4.69  | -7.31  | -2.07 | <b>&lt; 0.001</b> |                                                          | < 0.001                       | 88.7%                     |           | 17 | -3.23  | -5.10  | -1.36 | <b>0.001</b>      |                                                          | < 0.001                       | 90.5%                     |
| Health status                  | healthy                      | 37 | -4.72  | -6.43  | -3.01 | <b>&lt; 0.001</b> | 0.050                                                    | < 0.001                       | 85.6%                     |           | 35 | -3.22  | -4.40  | -2.03 | <b>&lt; 0.001</b> | 0.005                                                    | < 0.001                       | 87.5%                     |
|                                | chronic<br>diseases          | 5  | -1.76  | -4.18  | 0.66  | 0.153             |                                                          | 0.015                         | 67.4%                     |           | 5  | 0.15   | -1.89  | 2.20  | 0.884             |                                                          | < 0.001                       | 81.6%                     |
| Region                         | Asia                         | 27 | -3.79  | -5.30  | -2.27 | <b>&lt; 0.001</b> | 0.253                                                    | < 0.001                       | 89.7%                     |           | 27 | -2.37  | -3.28  | -1.46 | <b>&lt; 0.001</b> | 0.001                                                    | < 0.001                       | 87.1%                     |
|                                | Africa                       | 2  | -1.70  | -5.66  | 2.26  | 0.401             |                                                          | 1.000                         | -                         |           | 2  | 1.90   | -1.16  | 4.96  | 0.223             |                                                          | 1.000                         | -                         |
|                                | Europe                       | 4  | -3.40  | -6.91  | 0.11  | 0.058             |                                                          | 0.238                         | 29.1%                     |           | 3  | -0.87  | -2.27  | 0.53  | 0.221             |                                                          | 0.603                         | 0                         |
|                                | North<br>America             | 7  | -4.05  | -7.27  | -0.84 | <b>0.013</b>      |                                                          | 0.111                         | 42.0%                     |           | 6  | -2.26  | -4.78  | 0.25  | 0.078             |                                                          | 0.036                         | 57.9%                     |
|                                | South<br>America             | 2  | -15.40 | -26.47 | -4.33 | <b>0.006</b>      |                                                          | 0.003                         | 88.9%                     |           | 2  | -11.96 | -18.13 | -5.79 | <b>&lt; 0.001</b> |                                                          | 0.016                         | 82.6%                     |
| Research type                  | case-<br>control<br>study    | 2  | -4.15  | -6.97  | -1.34 | <b>0.004</b>      | 0.586                                                    | 0.700                         | 0                         |           | 2  | -0.63  | -2.26  | 1.00  | 0.450             | 0.078                                                    | 0.483                         | 0                         |
|                                | cross-<br>sectional<br>study | 33 | -3.98  | -5.80  | -2.15 | <b>&lt; 0.001</b> |                                                          | < 0.001                       | 86.5%                     |           | 31 | -2.69  | -3.93  | -1.45 | <b>&lt; 0.001</b> |                                                          | < 0.001                       | 86.3%                     |
|                                | cohort<br>study              | 7  | -6.48  | -10.90 | -2.07 | <b>0.004</b>      |                                                          | < 0.001                       | 91.4%                     |           | 7  | -3.58  | -6.37  | -0.80 | <b>0.012</b>      |                                                          | < 0.001                       | 91.7%                     |

Abbreviations: SBP: systolic blood pressure; DBP: diastolic blood pressure; WMD: weighted mean difference; mixed: vegan, lacto, lacto-ovo or a combination of two; We defined “vegan diet” as a diet which excludes the consumption of any meat, fish, seafood, eggs, and dairy, “lacto vegetarian diet” as a diet which excludes the consumption of any meat, fish, seafood, and eggs, and “lacto-ovo vegetarian diet” as a diet which excludes the consumption of any meat, fish, and seafood. The mixed diet was a combination of these vegetarian subtypes.

Table S10. Subgroup analyses for the effects of the vegetarian diet on blood pressure (randomized controlled trials).

| SBP, mmHg                   |                   |          |       |           |       |                 |                                                 |                            |                           | DBP, mmHg |      |             |        |       |                 |                                                 |                            |                           |
|-----------------------------|-------------------|----------|-------|-----------|-------|-----------------|-------------------------------------------------|----------------------------|---------------------------|-----------|------|-------------|--------|-------|-----------------|-------------------------------------------------|----------------------------|---------------------------|
| Group                       |                   | N        | WMD   | 95% CI    |       | <i>p</i> -value | <i>p</i> -value for between group heterogeneity | <i>p</i> for heterogeneity | <i>I</i> <sup>2</sup> (%) | —         | N    | WMD         | 95% CI |       | <i>p</i> -value | <i>p</i> -value for between group heterogeneity | <i>p</i> for heterogeneity | <i>I</i> <sup>2</sup> (%) |
|                             |                   |          |       | lower     | upper |                 |                                                 |                            |                           |           |      |             | lower  | upper |                 |                                                 |                            |                           |
| Duration of vegetarian diet | < 12 weeks        | 2        | -3.40 | -11.09    | 4.29  | 0.386           | 0.254                                           | 0.239                      | 28.0%                     |           | 2    | -1.77       | -6.96  | 3.42  | 0.503           | 0.467                                           | 0.167                      | 47.7%                     |
|                             | ≥ 12 weeks        | 11       | 1.23  | -0.81     | 3.28  | 0.238           |                                                 | 0.005                      | 60.7%                     |           | 11   | 0.21        | -1.09  | 1.51  | 0.749           |                                                 | 0.002                      | 64.4%                     |
| Region                      | Asia              | 1        | 1.00  | -9.00     | 11.00 | 0.845           | 0.052                                           | -                          | -                         |           | 1    | 1.00        | -4.54  | 6.54  | 0.724           | 0.677                                           | -                          | -                         |
|                             | Europe            | 2        | -5.40 | -11.32    | 0.52  | 0.074           |                                                 | 0.632                      | 0                         |           | 2    | -1.68       | -6.87  | 3.51  | 0.526           |                                                 | 0.152                      | 51.3%                     |
|                             | North America     | 9        | 1.05  | -1.25     | 3.35  | 0.373           |                                                 | 0.010                      | 59.9%                     |           | 9    | -0.01       | -1.67  | 1.65  | 0.991           |                                                 | 0.002                      | 67.4%                     |
|                             | Oceania           | 1        | 4.00  | 0.83      | 7.17  | <b>0.014</b>    |                                                 | -                          | -                         |           | 1    | 1.00        | -0.46  | 2.46  | 0.179           |                                                 | -                          | -                         |
| Research type               | parallel design   | 11       | 0.67  | -1.45     | 2.79  | 0.536           | 0.524                                           | 0.002                      | 63.9%                     |           | 11   | -0.31       | -1.59  | 0.98  | 0.640           | 0.046                                           | 0.005                      | 60.3%                     |
|                             | cross-over design | 2        | 3.06  | -3.98     | 10.11 | 0.394           |                                                 | 0.568                      | 0                         |           | 2    | 2.70        | 0.04   | 5.35  | 0.046           |                                                 | 0.495                      | 0                         |
| Abbreviations:              | SBP:              | systolic | blood | pressure; | DBP:  | diastolic       | blood                                           | pressure;                  | WMD:                      | weighted  | mean | difference. |        |       |                 |                                                 |                            |                           |

Table S11. Begg’s test and Egger’s test for the observational studies.

|              | TC    | TG    | LDL-C | HDL-C | FBG   | HOMA-IR | HbA1c | SBP   | DBP   |
|--------------|-------|-------|-------|-------|-------|---------|-------|-------|-------|
| Begg’s test  | 0.468 | 0.170 | 0.035 | 0.635 | 0.234 | 0.296   | 1.000 | 0.931 | 0.121 |
| Egger’s test | 0.093 | 0.002 | 0.526 | 0.735 | 0.006 | 0.158   | 0.577 | 0.012 | 0.356 |

Abbreviations: TC: total cholesterol; TG: triglyceride; LDL-C: low-density lipoprotein-cholesterol; HDL-C: high-density lipoprotein-cholesterol; FBG: fasting blood glucose; HOMA-IR: homeostatic model assessment for insulin resistance; HbA1c: glycosylated hemoglobin; SBP: systolic blood pressure; DBP: diastolic blood pressure.

Table S12. Begg’s test and Egger’s test for the included randomized controlled trials.

|              | TC    | TG    | LDL-C | HDL-C | FBG   | HOMA-IR | HbA1c | SBP   | DBP   |
|--------------|-------|-------|-------|-------|-------|---------|-------|-------|-------|
| Begg’s test  | 0.902 | 0.266 | 0.276 | 0.225 | 0.640 | 0.806   | 1.000 | 0.760 | 0.951 |
| Egger’s test | 0.010 | 0.783 | 0.001 | 0.039 | 0.498 | 0.401   | 0.056 | 0.919 | 0.605 |

Abbreviations: TC: total cholesterol; TG: triglyceride; LDL-C: low-density lipoprotein-cholesterol; HDL-C: high-density lipoprotein-cholesterol; FBG: fasting blood glucose; HOMA-IR: homeostatic model assessment for insulin resistance; HbA1c: glycosylated hemoglobin; SBP: systolic blood pressure; DBP: diastolic blood pressure.

Table S13. Certainty of evidence for the included observational studies.

| Outcomes                       | Summary of findings                     |                             | Certainty of evidence     |                               |                          |                            | Certainty of evidence |          |
|--------------------------------|-----------------------------------------|-----------------------------|---------------------------|-------------------------------|--------------------------|----------------------------|-----------------------|----------|
|                                | No. of participants<br>(no. of studies) | Mean difference<br>(95% CI) | Risk of Bias <sup>a</sup> | Publication bias <sup>b</sup> | Imprecision <sup>c</sup> | Inconsistency <sup>d</sup> | (GRADE score)         |          |
| TC (mmol/L)                    | 108409 (55)                             | -0.54 (-0.60 to -0.48)      | ●                         | ●                             | ●                        | ○                          | ●●●●                  | Moderate |
| TG (mmol/L)                    | 63618 (53)                              | -0.11 (-0.17 to -0.05)      | ●                         | ○                             | ○                        | ○                          | ●                     | Very Low |
| LDL-C (mmol/L)                 | 62806 (44)                              | -0.41 (-0.48 to -0.34)      | ●                         | ●                             | ●                        | ○                          | ●●●●                  | Moderate |
| HDL-C (mmol/L)                 | 64610 (49)                              | -0.07 (-0.09 to -0.05)      | ●                         | ●                             | ●                        | ○                          | ●●●●                  | Moderate |
| Fasting blood glucose (mmol/L) | 61853 (31)                              | -0.26 (-0.34 to -0.19)      | ●                         | ○                             | ●                        | ○                          | ●●                    | Low      |
| HOMA-IR                        | 1301 (3)                                | -0.14 (-0.44 to 0.16)       | ●                         | ●                             | ○                        | ○                          | ●●                    | Low      |
| HbA1c (%)                      | 1361 (6)                                | -0.07 (-0.24 to 0.10)       | ●                         | ●                             | ○                        | ○                          | ●●                    | Low      |
| SBP (mmHg)                     | 107844 (42)                             | -4.30 (-5.63 to -2.97)      | ●                         | ○                             | ●                        | ○                          | ●●                    | Low      |
| DBP (mmHg)                     | 107705 (41)                             | -2.63 (-3.47 to -1.79)      | ●                         | ●                             | ●                        | ○                          | ●●●●                  | Moderate |

Abbreviations: CI: confidence interval; GRADE: Grading of Recommendations, Assessment, Development and Evaluations; TC: total cholesterol concentration; TG: triglyceride concentration; LDL-C: low-density lipoprotein-cholesterol; HDL-C: high-density lipoprotein-cholesterol; FBG: fasting blood glucose; HOMA-IR: homeostatic model assessment for insulin resistance; HbA1c: glycated hemoglobin; SBP: systolic blood pressure; DBP: diastolic blood pressure.

<sup>a</sup> Downgraded by one level if >25% of participants were from studies with a Newcastle-Ottawa Scale < 4.

<sup>b</sup> Downgraded by one level if the p-value of Egger’s test < 0.05.

<sup>c</sup> Downgraded by one level if a wide confidence interval was observed.

<sup>d</sup> Downgraded by one level if a substantial heterogeneity.

Table S14. Certainty of evidence for the included randomized controlled trials.

| Outcomes                       | Summary of findings                    |                             | Certainty of evidence     |                               |                          |                            |                                        |
|--------------------------------|----------------------------------------|-----------------------------|---------------------------|-------------------------------|--------------------------|----------------------------|----------------------------------------|
|                                | No. of participants<br>(no. of trials) | Mean difference<br>(95% CI) | Risk of Bias <sup>a</sup> | Publication bias <sup>b</sup> | Imprecision <sup>c</sup> | Inconsistency <sup>d</sup> | Certainty of evidence<br>(GRADE score) |
| TC (mmol/L)                    | 1343 (17)                              | -0.24 (-0.37 to -0.10)      | ●                         | ○                             | ●                        | ○                          | ●● Low                                 |
| TG (mmol/L)                    | 1455 (17)                              | -0.002 (-0.09 to 0.09)      | ●                         | ●                             | ○                        | ○                          | ●● Low                                 |
| LDL-C (mmol/L)                 | 1289 (15)                              | -0.25 (-0.38 to -0.12)      | ●                         | ○                             | ●                        | ○                          | ●● Low                                 |
| HDL-C (mmol/L)                 | 1451 (18)                              | -0.07 (-0.11 to -0.04)      | ●                         | ○                             | ●                        | ○                          | ●● Low                                 |
| Fasting blood glucose (mmol/L) | 814 (11)                               | -0.50 (-0.80 to -0.20)      | ●                         | ●                             | ●                        | ○                          | ●●● Moderate                           |
| HOMA-IR                        | 624 (5)                                | -0.96 (-1.37 to -0.55)      | ●                         | ●                             | ●                        | ●                          | ●●●● High                              |
| HbA1c (%)                      | 847 (12)                               | -0.10 (-0.19 to -0.01)      | ●                         | ●                             | ●                        | ●                          | ●●●● High                              |
| SBP (mmHg)                     | 983 (13)                               | 0.88 (-1.10 to 2.85)        | ●                         | ●                             | ○                        | ○                          | ●● Low                                 |
| DBP (mmHg)                     | 983 (13)                               | 0.04 (-1.20 to 1.28)        | ●                         | ●                             | ○                        | ○                          | ●● Low                                 |

Abbreviations: CI: confidence interval; GRADE: Grading of Recommendations, Assessment, Development and Evaluations; TC: total cholesterol concentration; TG: triglyceride concentration; LDL-C: low-density lipoprotein-cholesterol; HDL-C: high-density lipoprotein-cholesterol; FBG: fasting blood glucose; HOMA-IR: homeostatic model assessment for insulin resistance; HbA1c: glycated hemoglobin; SBP: systolic blood pressure; DBP: diastolic blood pressure.

<sup>a</sup> Downgraded by one level if >25% of participants were from trials at a high risk of bias.

<sup>b</sup> Downgraded by one level if the p-value of Egger’s test < 0.05.

<sup>c</sup> Downgraded by one level if a wide confidence interval was observed.

<sup>d</sup> Downgraded by one level if a substantial heterogeneity.

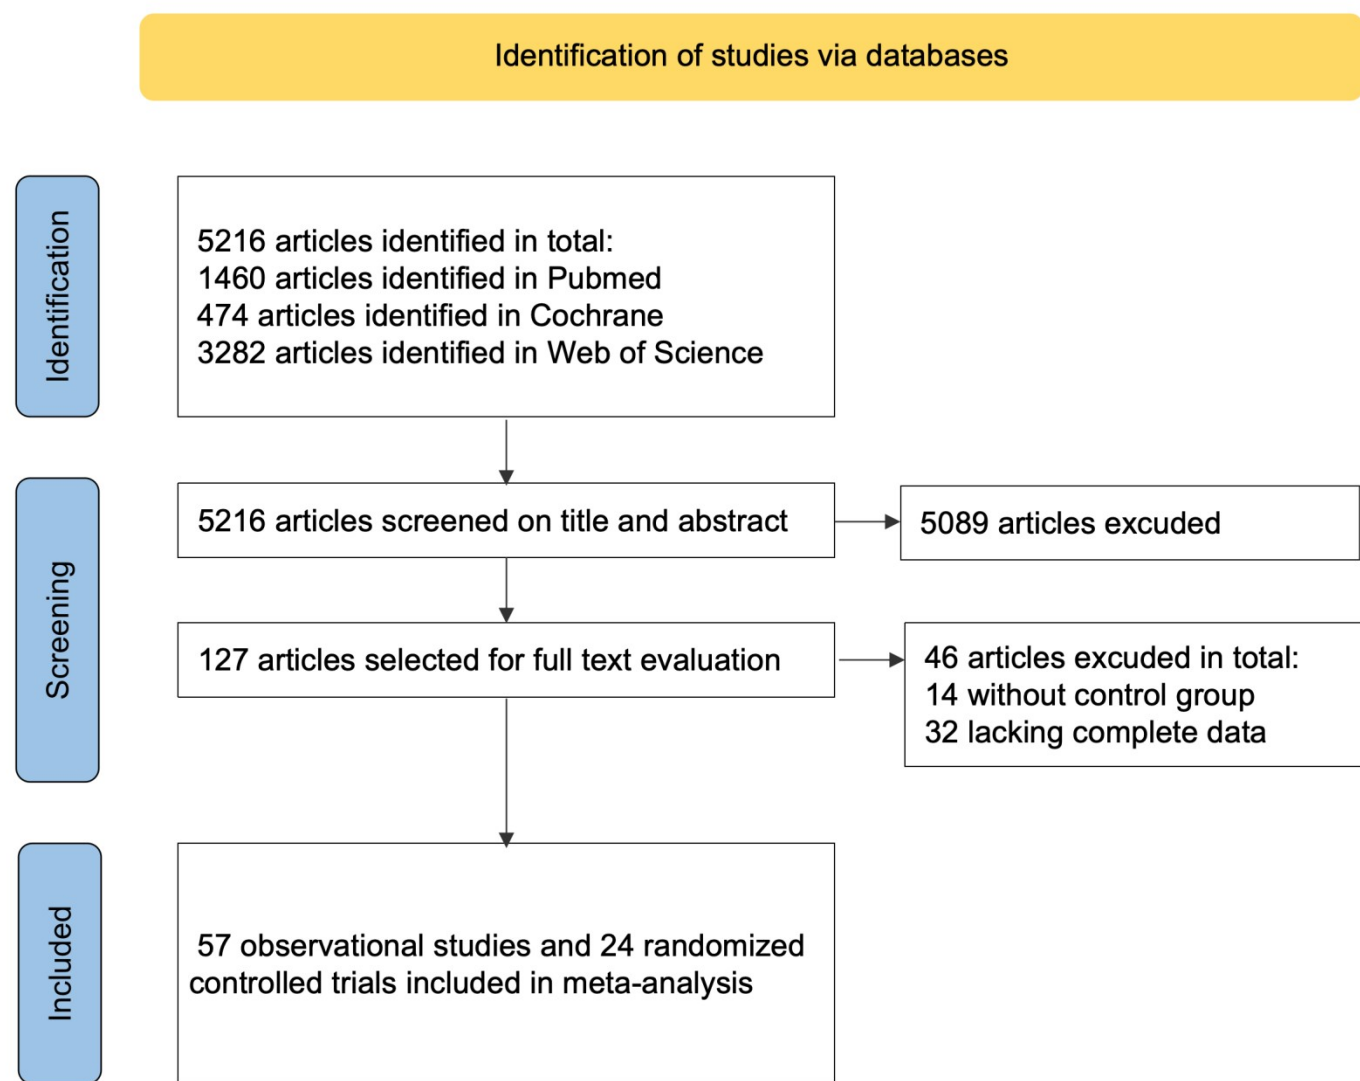

Figure S1. Flow diagram of the paper selection process.

| Study ID                    | Outcome                                     | D1 | D2 | D3 | D4 | D5 | Overall |
|-----------------------------|---------------------------------------------|----|----|----|----|----|---------|
| Cooper et al, 1982          | TC/TG/HDL-C/LDL-C/FBG                       | +  | +  | +  | +  | !  | !       |
| Sciarrone et al, 1993       | SBP/DBP/FBG/FBI                             | +  | +  | +  | +  | +  | +       |
| Kontessis et al, 1995       | HbA1c                                       | +  | +  | +  | +  | +  | +       |
| Nicholson et al, 1999       | SBP/DBP/TC/TG/HDL-C/HbA1c                   | !  | !  | +  | +  | !  | -       |
| Barnard et al, 2000         | TC/TG/LDL-C/HDL-C                           | +  | +  | +  | +  | +  | +       |
| Agren et al, 2001           | TC/TG/LDL-C/HDL-C                           | !  | !  | +  | +  | +  | !       |
| Wheeler et al, 2002         | SBP/DBP/TC/HDL-C/HbA1c                      | +  | +  | +  | +  | +  | +       |
| Barnard et al, 2005         | FBG/FBI                                     | +  | +  | +  | +  | +  | +       |
| Barnard et al,2006          | SBP/DBP/TC/TG/LDL-C/HDL-C/FBG/HbA1c         | +  | +  | +  | +  | +  | +       |
| Burke et al, 2007           | TC/TG/HOMA-IR                               | +  | +  | +  | +  | +  | +       |
| Elkan et al, 2008           | TC/TG/LDL-C/HDL-C                           | +  | !  | +  | +  | +  | !       |
| Barnard et al, 2009         | SBP/DBP/TG/HDL-C/FBG                        | +  | +  | +  | +  | +  | +       |
| Levin et al, 2010           | SBP/DBP/HbA1c/TC/LDL-C/HDL-C                | !  | !  | +  | +  | +  | !       |
| Kahleova et al, 2011        | TC/TG/LDL-C/HDL-C/FBG/FBI/HbA1c             | +  | +  | +  | +  | +  | +       |
| Mishra et al, 2013          | SBP/DBP/TG/TC/LDL-C/HDL-C                   | +  | +  | +  | +  | +  | +       |
| Bunner et al, 2015          | SBP/DBP/TC/TG/LDL-C/HDL-C/FBG/HbA1c         | +  | +  | +  | +  | +  | +       |
| Wright et al, 2017          | SBP/DBP/TC/TG/LDL-C/HDL-C/HbA1c             | !  | +  | +  | +  | +  | !       |
| Barnard et al, 2018         | SBP/DBP/TC/LDL-C/HDL-C                      | !  | +  | +  | +  | +  | !       |
| Kahleova et al, 2020        | TC/TG/LDL-C/HDL-C/FBG/FBI/HbA1c/HOMA-IR     | +  | +  | +  | +  | +  | +       |
| Barnard et al, 2021         | SBP/DBP/TC/TG/LDL-C/HDL-C/FBG/HbA1c/HOMA-IR | +  | +  | +  | +  | +  | +       |
| Dressler et al, 2022        | SBP/DBP/TC/TG/LDL-C/HDL-C/FBG/HbA1c/HOMA-IR | +  | +  | +  | +  | +  | +       |
| Crosby et al, 2022          | HOMA-IR                                     | +  | +  | +  | +  | +  | +       |
| Turner-McGrievy et al, 2022 | SBP/DBP/HbA1c                               | +  | +  | +  | +  | !  | !       |
| Walrabenstein et al, 2023   | SBP/DBP/TG/LDL-C/HDL-C/FBG/HbA1c            | +  | +  | +  | +  | +  | +       |

+

Low risk

!

Some concerns

-

High risk

- D1 Randomisation proces
- D2 Deviations from the intended intervettions
- D3 Missing outcome data
- D4 Measurement of the outcome
- D5 Selection of the reported result

Figure S2. Risk of bias assessment for the included randomized controlled trials.



A

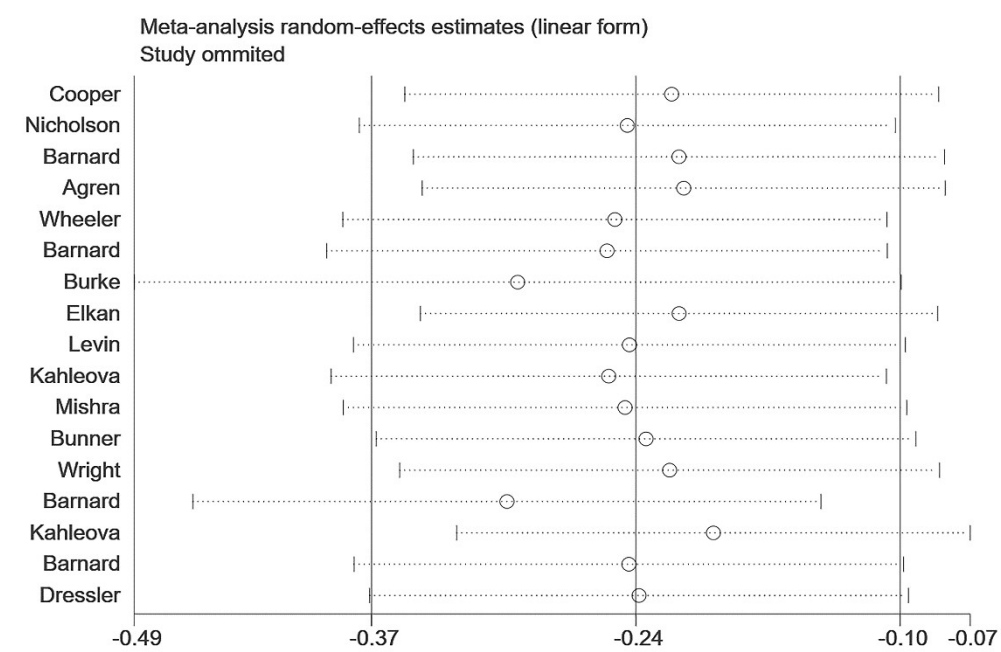

B

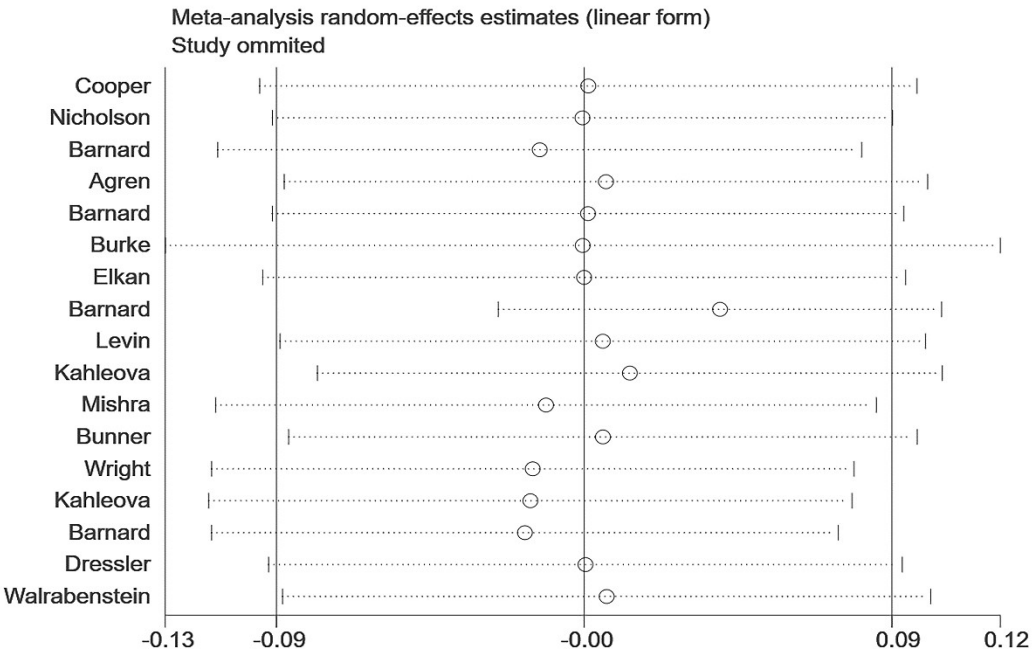

C

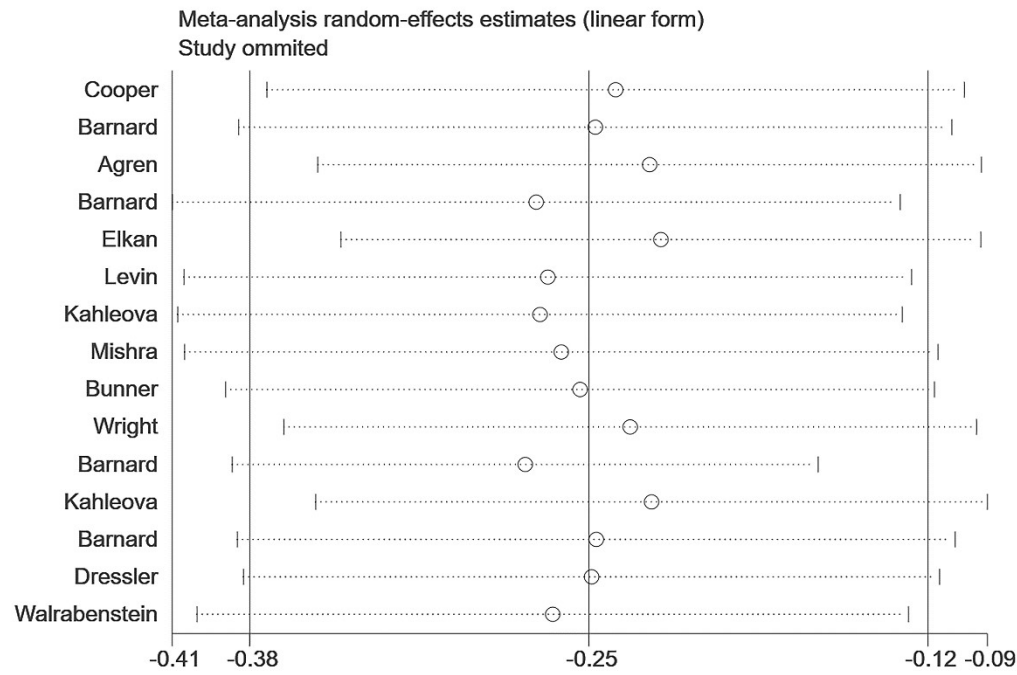

D

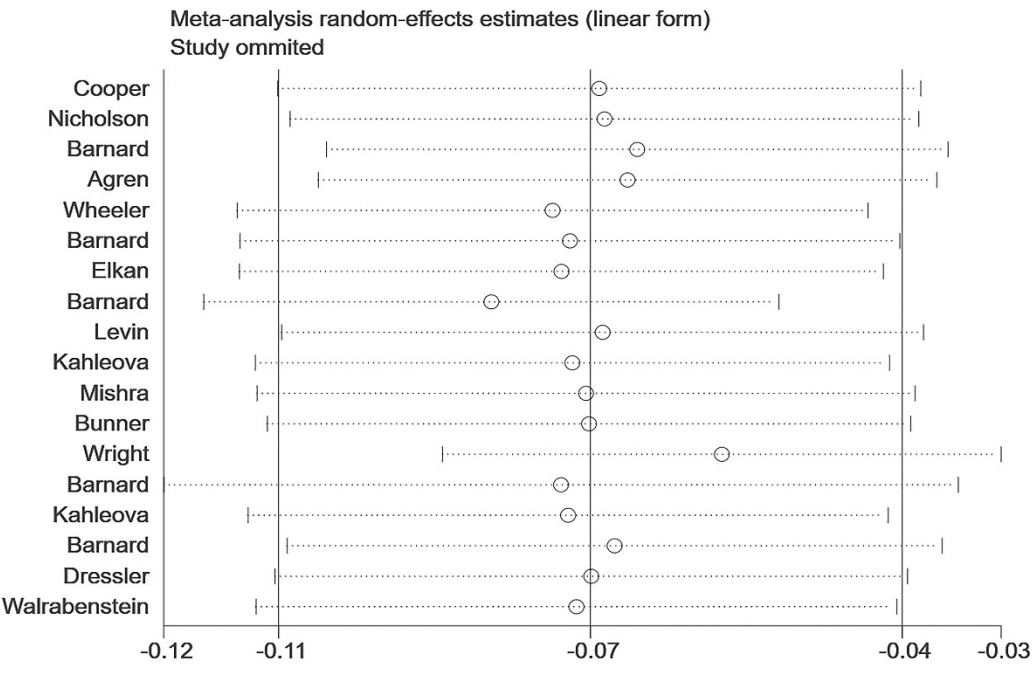

E

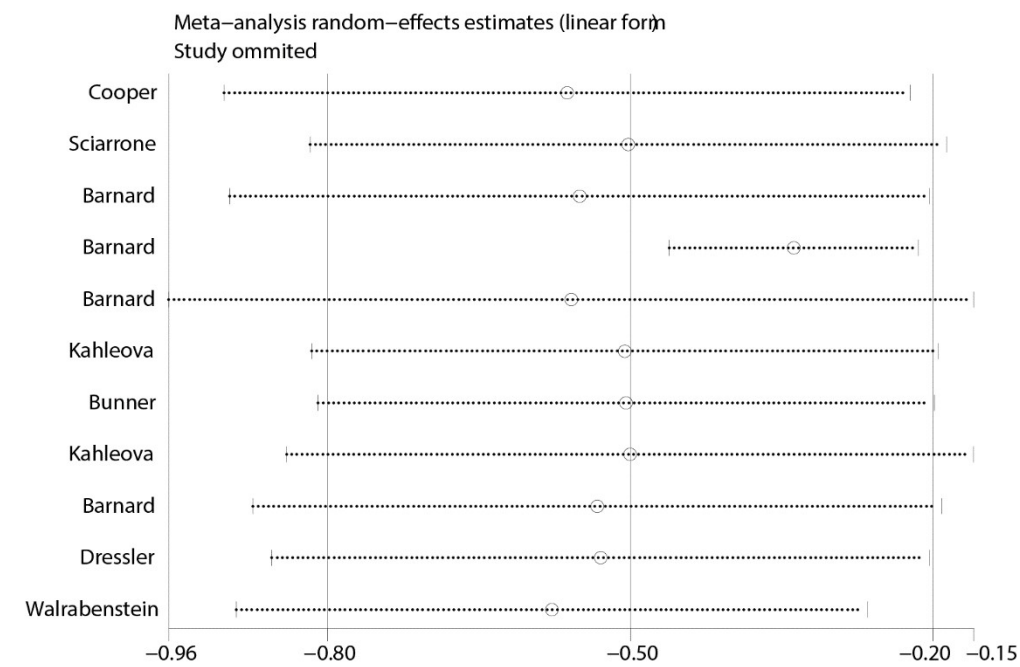

F

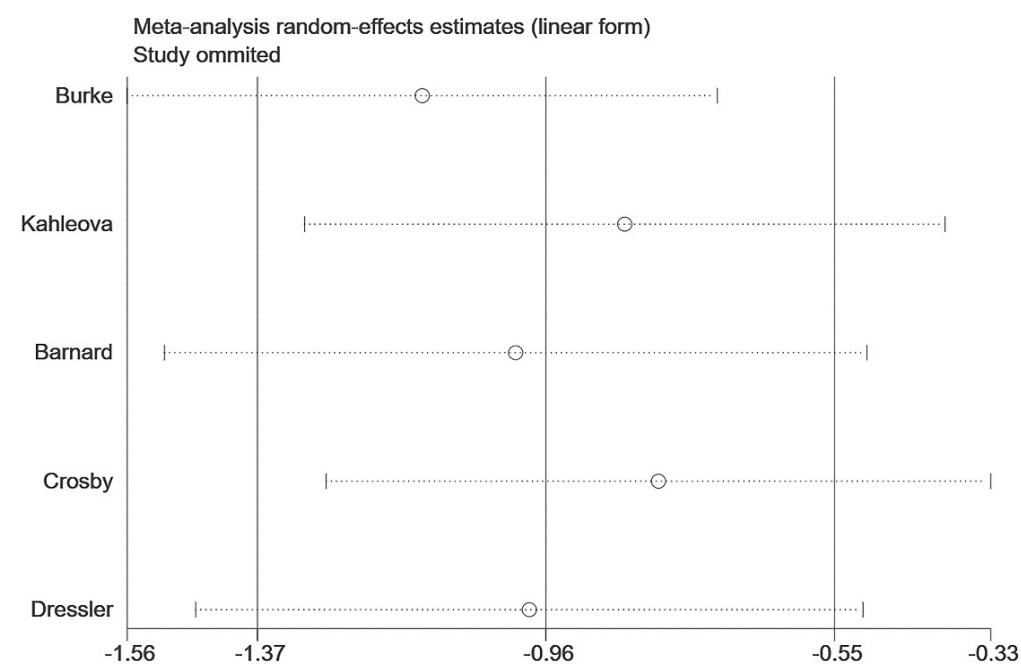

G

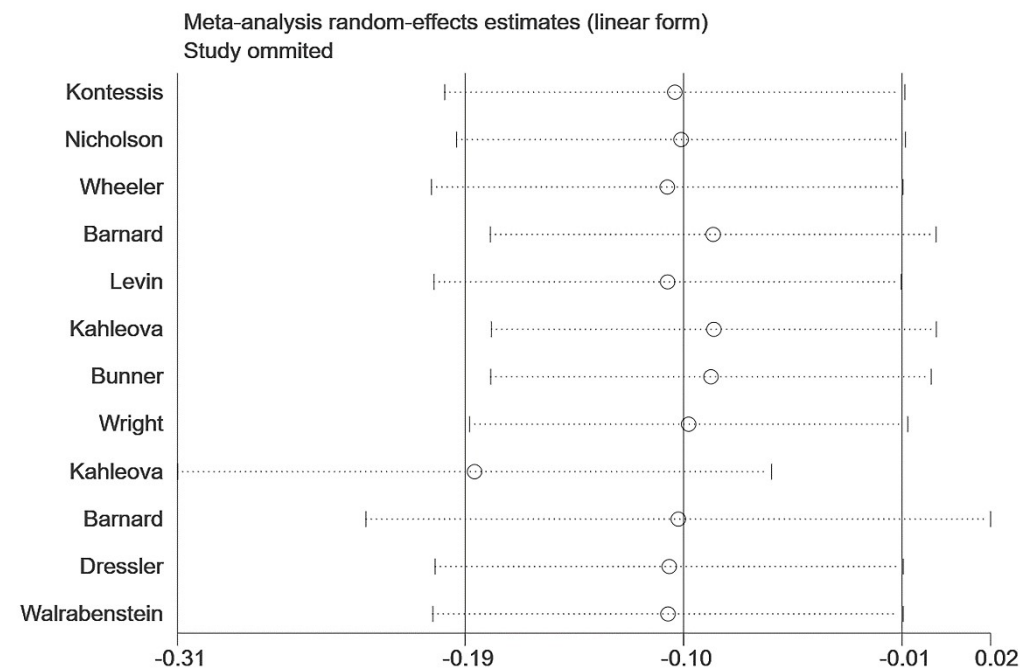

H

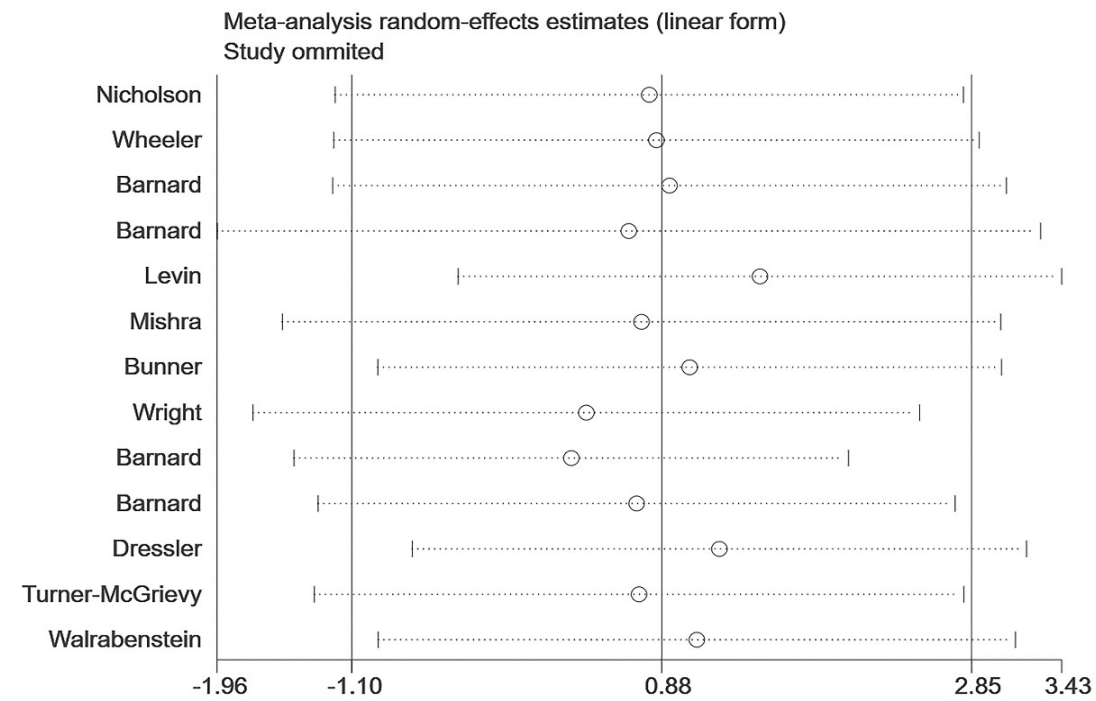

I

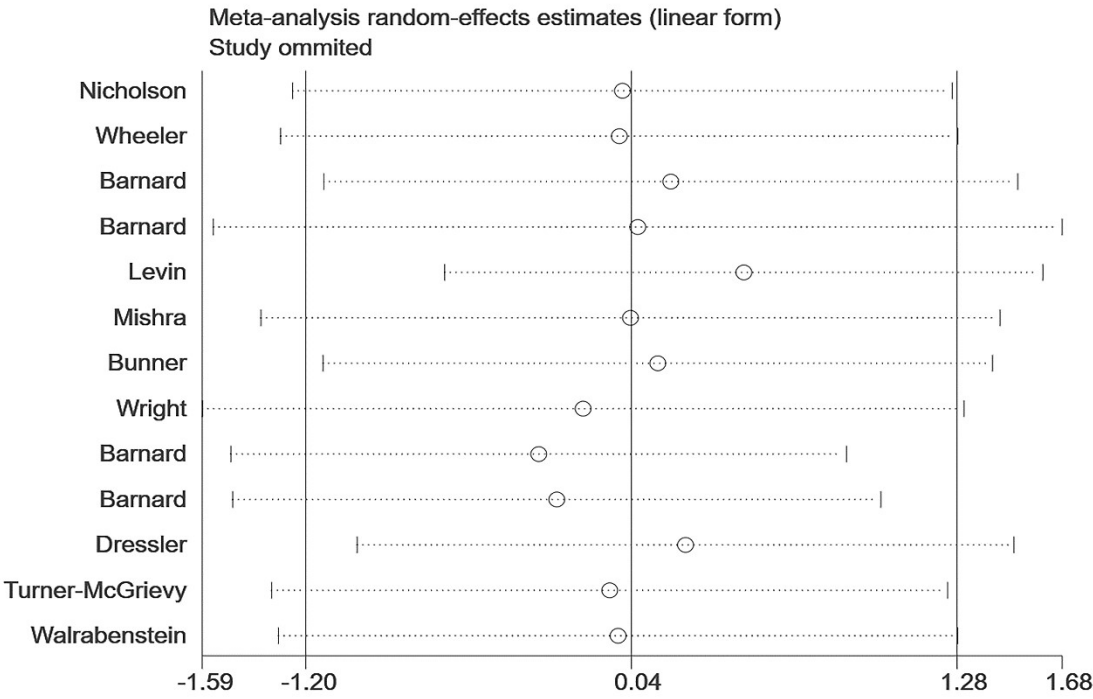

Figure S3. Sensitivity analysis for the included randomized controlled trials.  
A. TC: total cholesterol; B. TG: triglyceride; C. LDL-C: low-density lipoprotein-cholesterol; D. HDL-C: high-density lipoprotein-cholesterol; E. FBG: fasting blood glucose; F. HOMA-IR: homeostatic model assessment for insulin resistance; G. HbA1c: glycosylated hemoglobin; H. SBP: systolic blood pressure; I. DBP: diastolic blood pressure.



•  
A

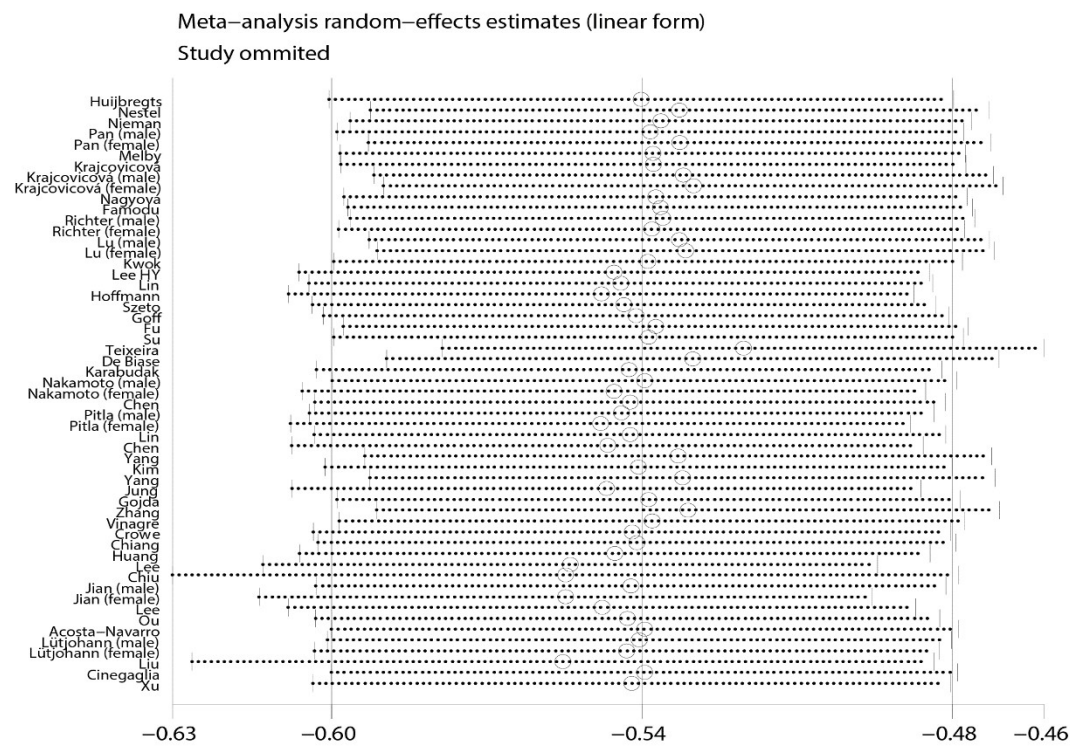

C

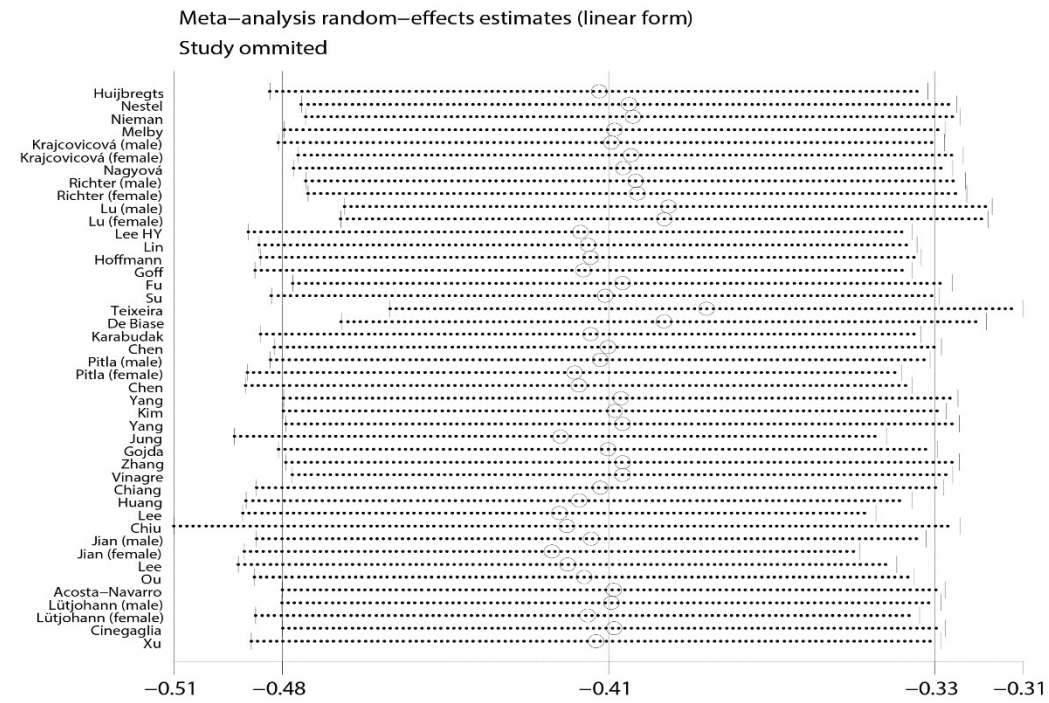

B

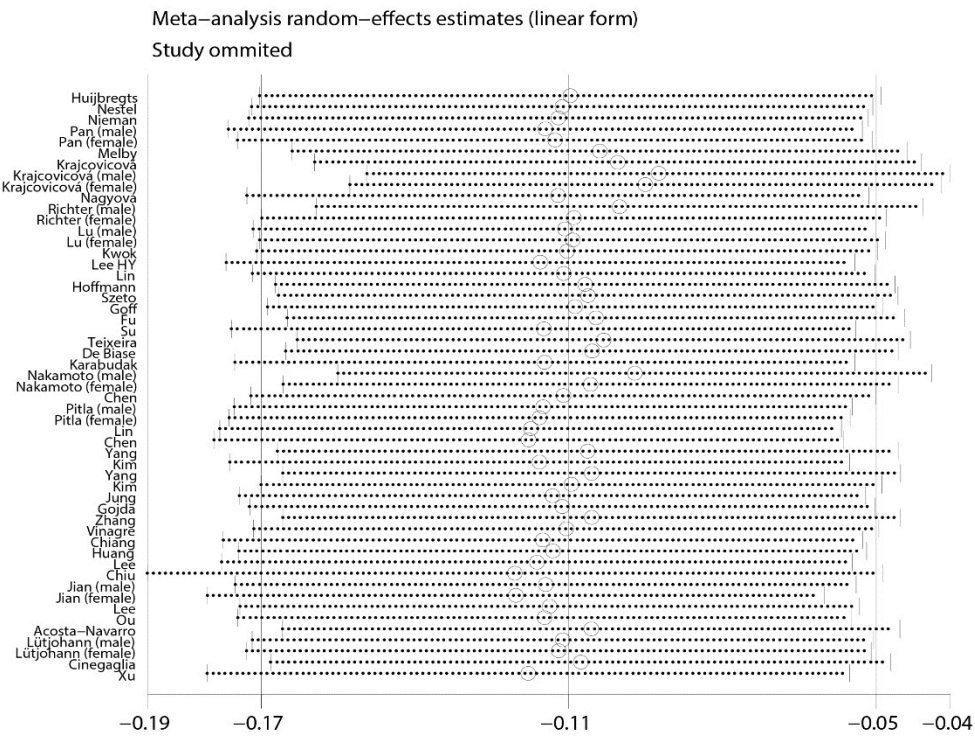

D

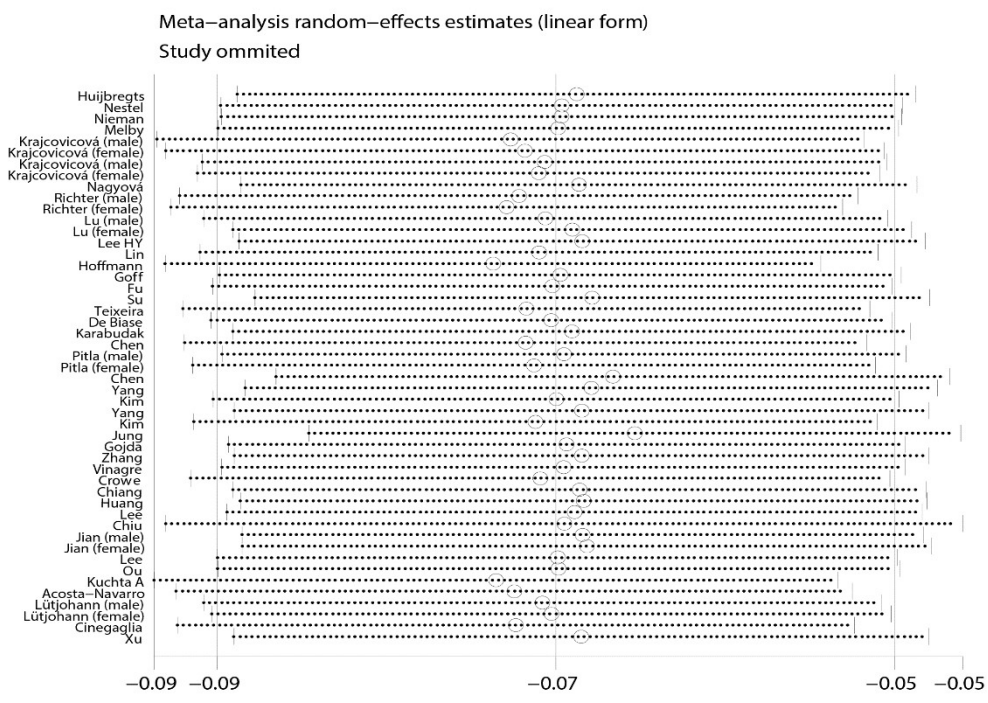

E

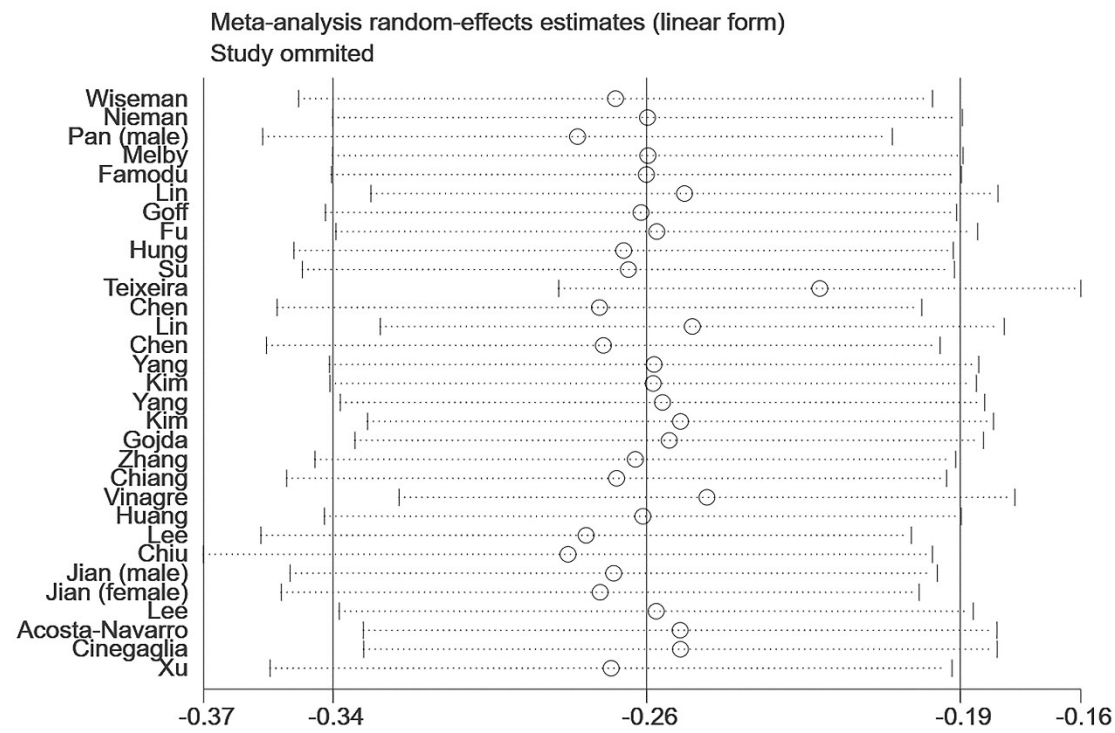

F

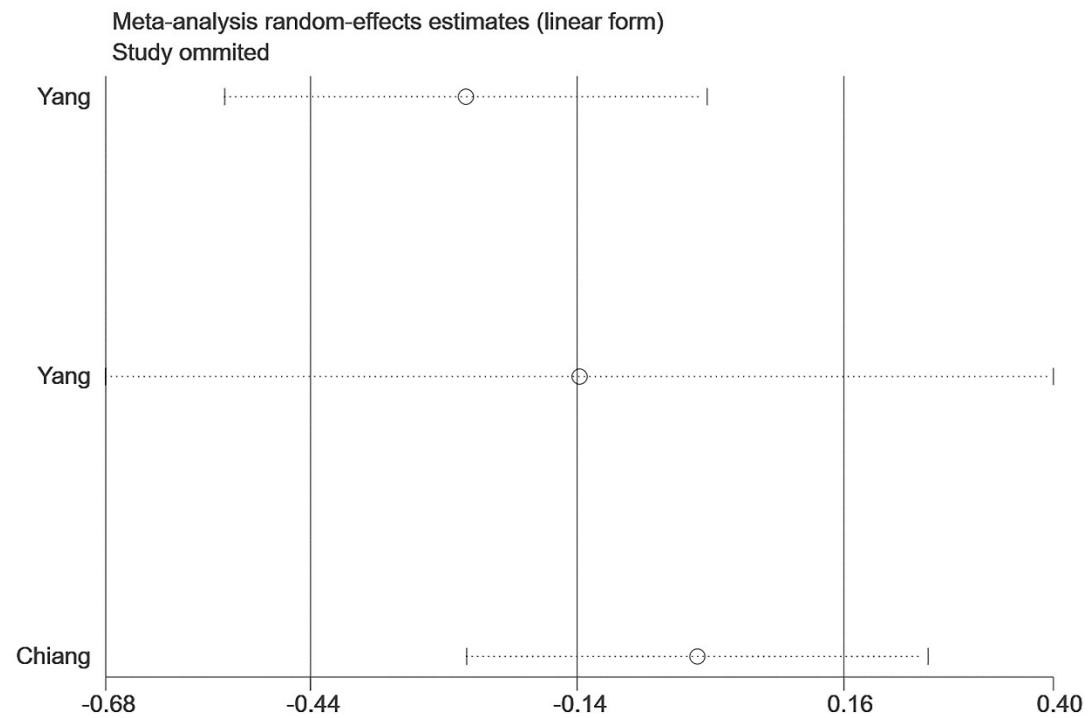

G

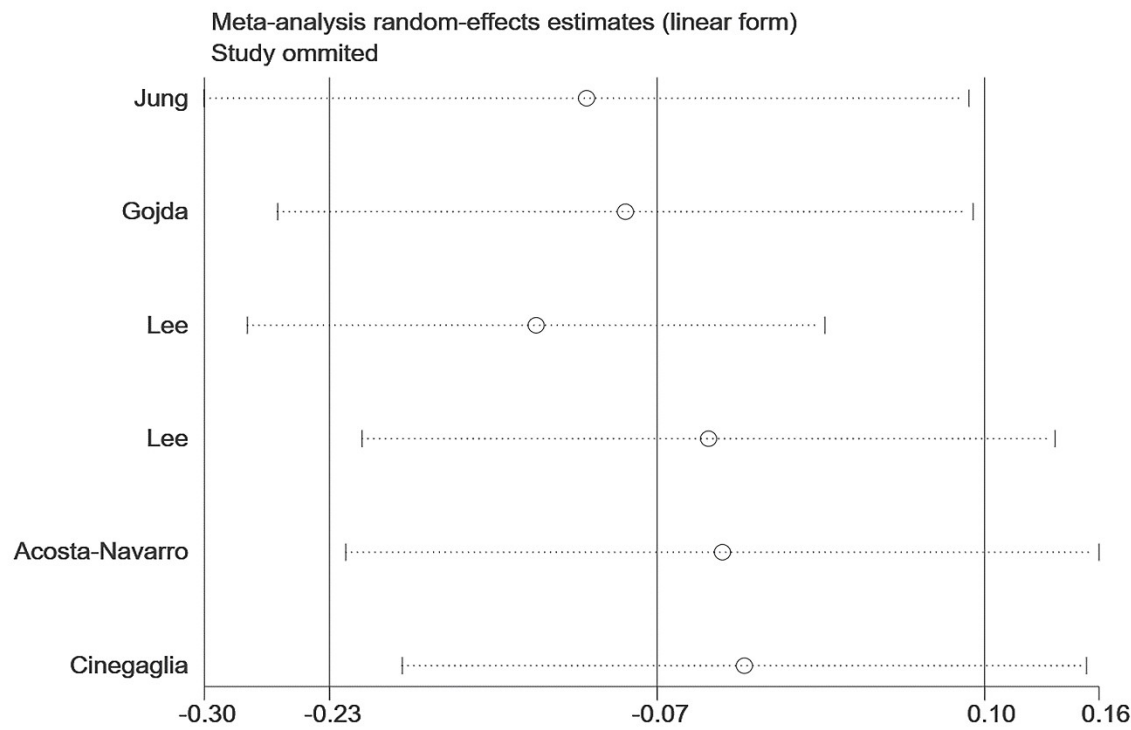

H

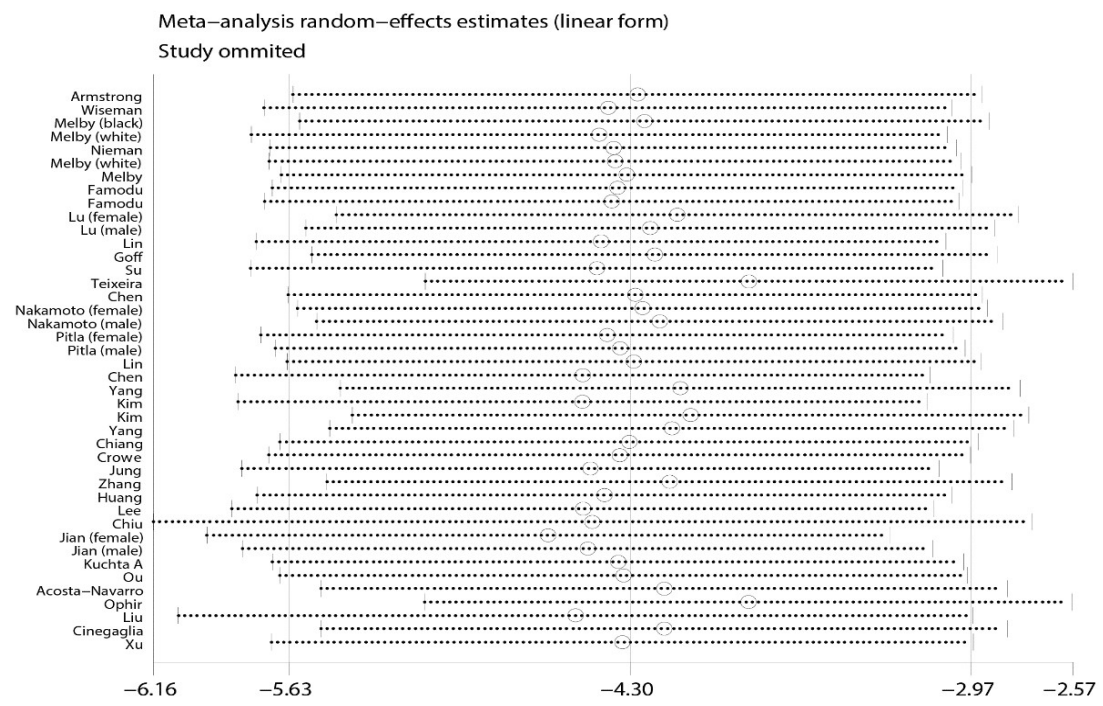



I

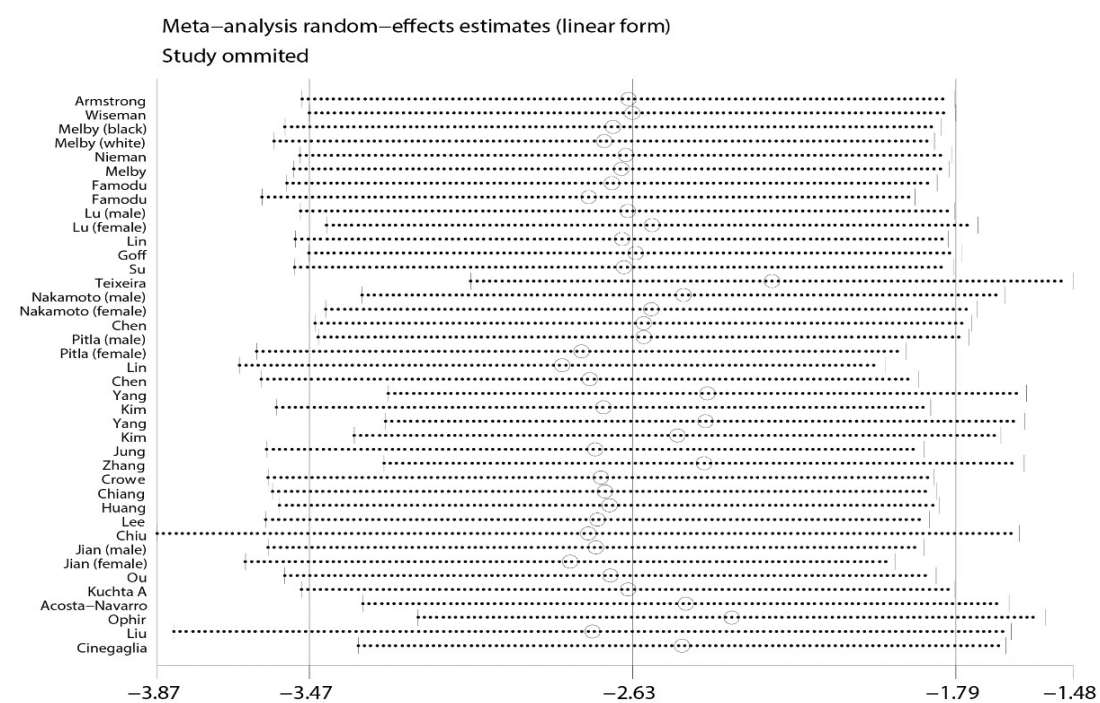

Figure S4. Sensitivity analysis for the included observational studies.  
A.TC: total cholesterol; B. TG: triglyceride; C. LDL-C: low-density lipoprotein-cholesterol; D. HDL-C: high-density lipoprotein-cholesterol; E. FBG: fasting blood glucose; F. HOMA-IR: homeostatic model assessment for insulin resistance; G. HbA1c: glycosylated hemoglobin; H. SBP: systolic blood pressure; I. DBP: diastolic blood pressure.

**A**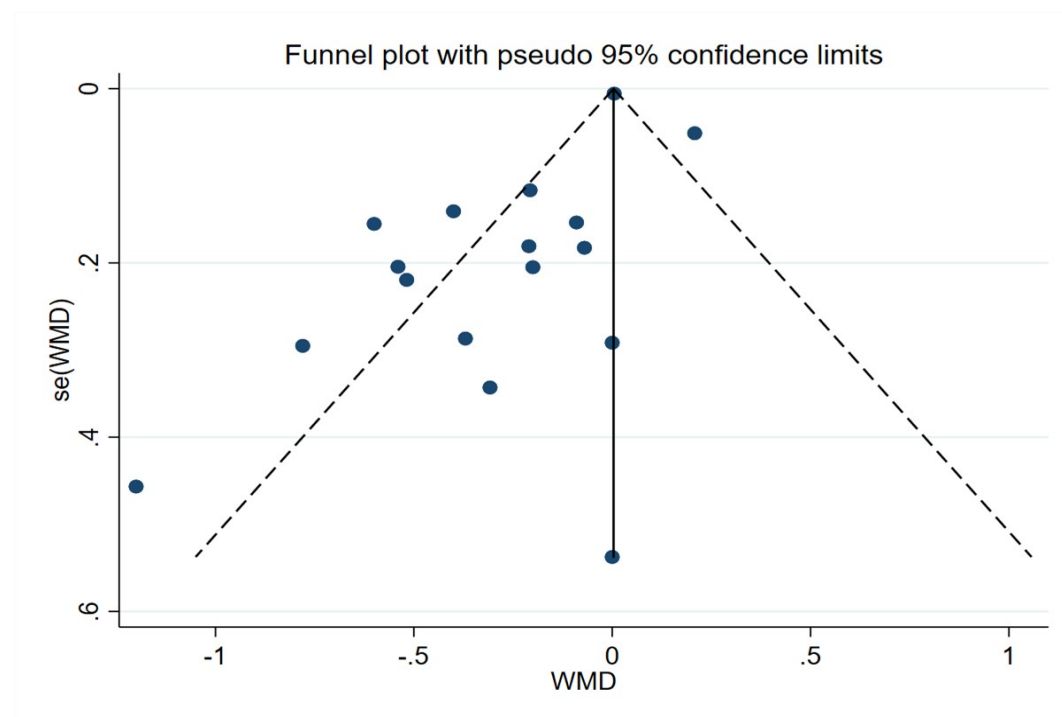**B**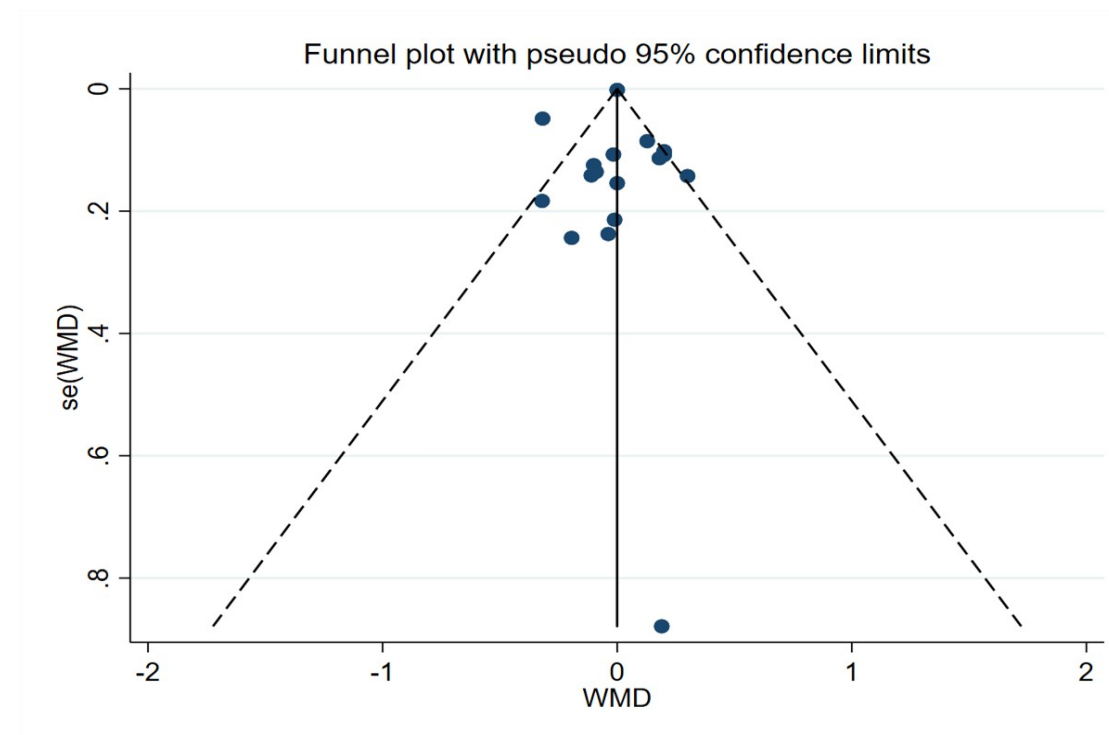**C**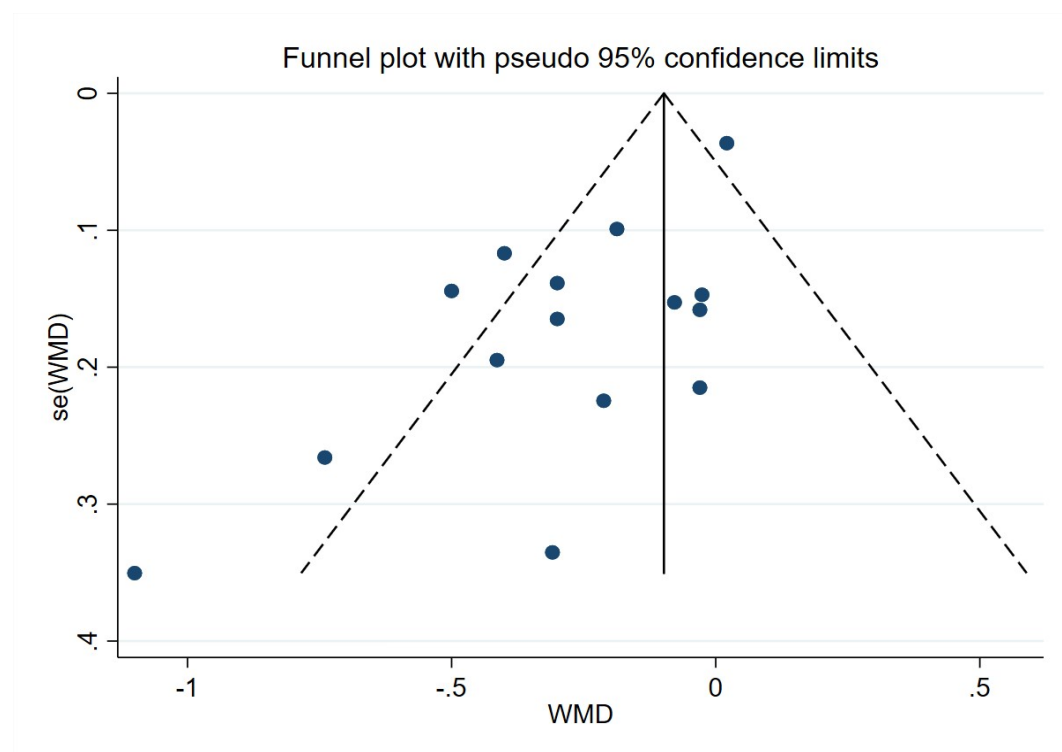**D**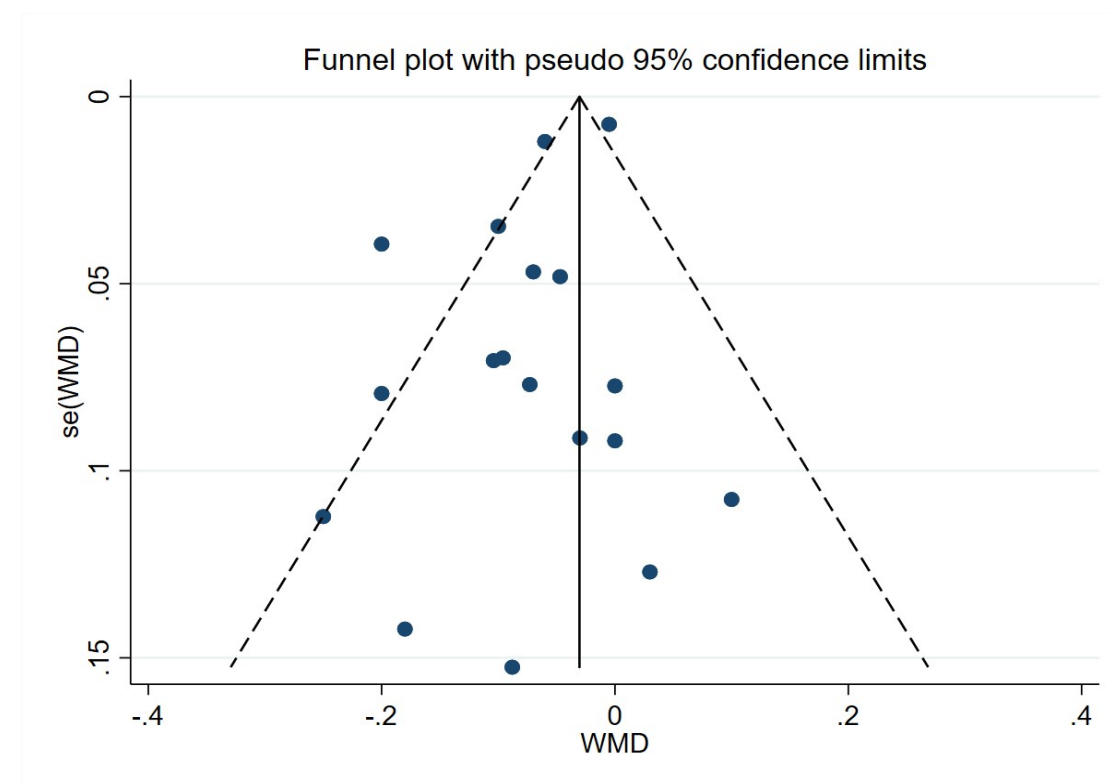

E

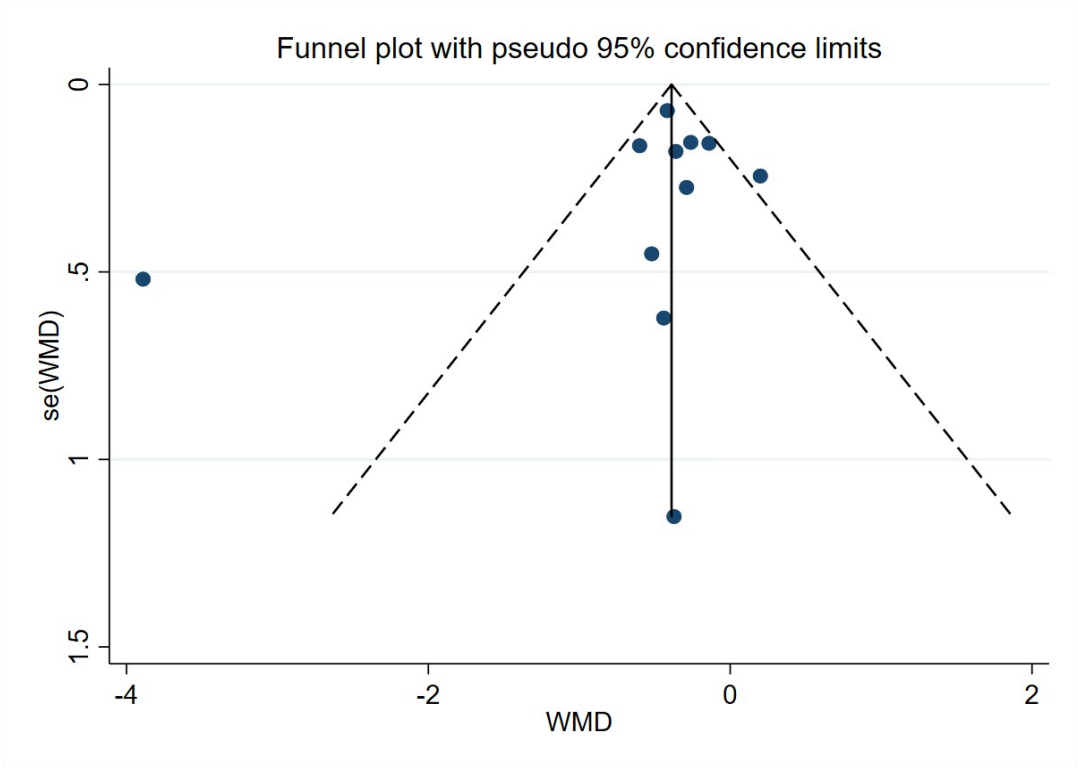

F

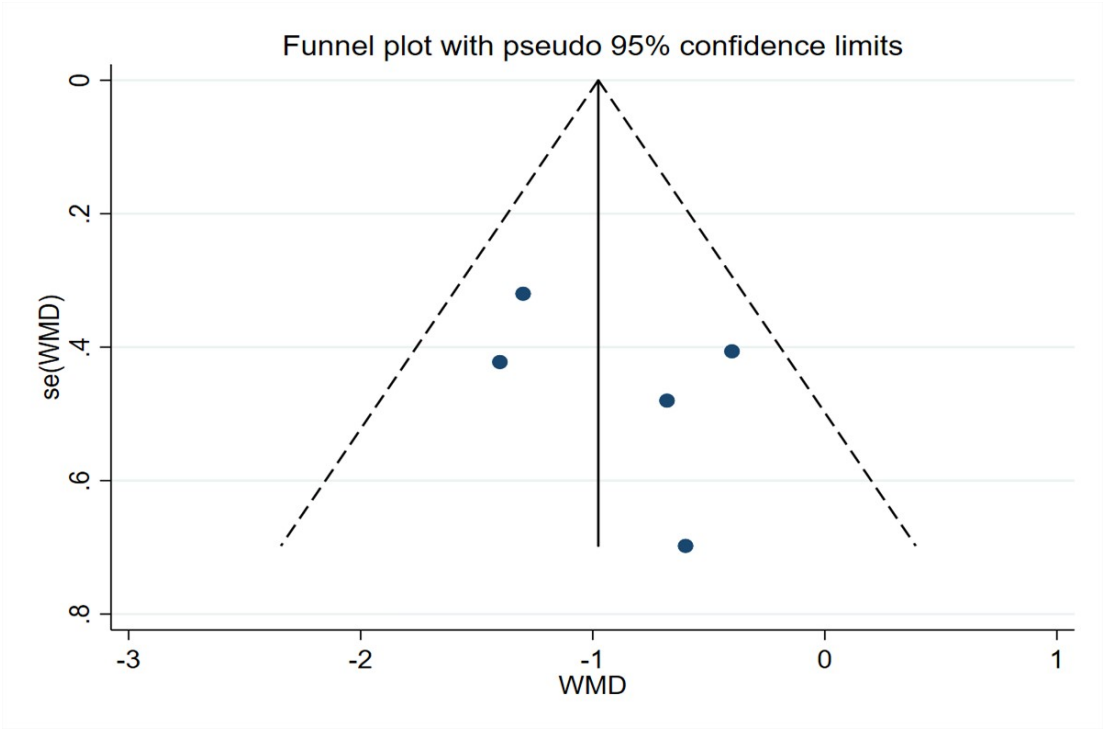

G

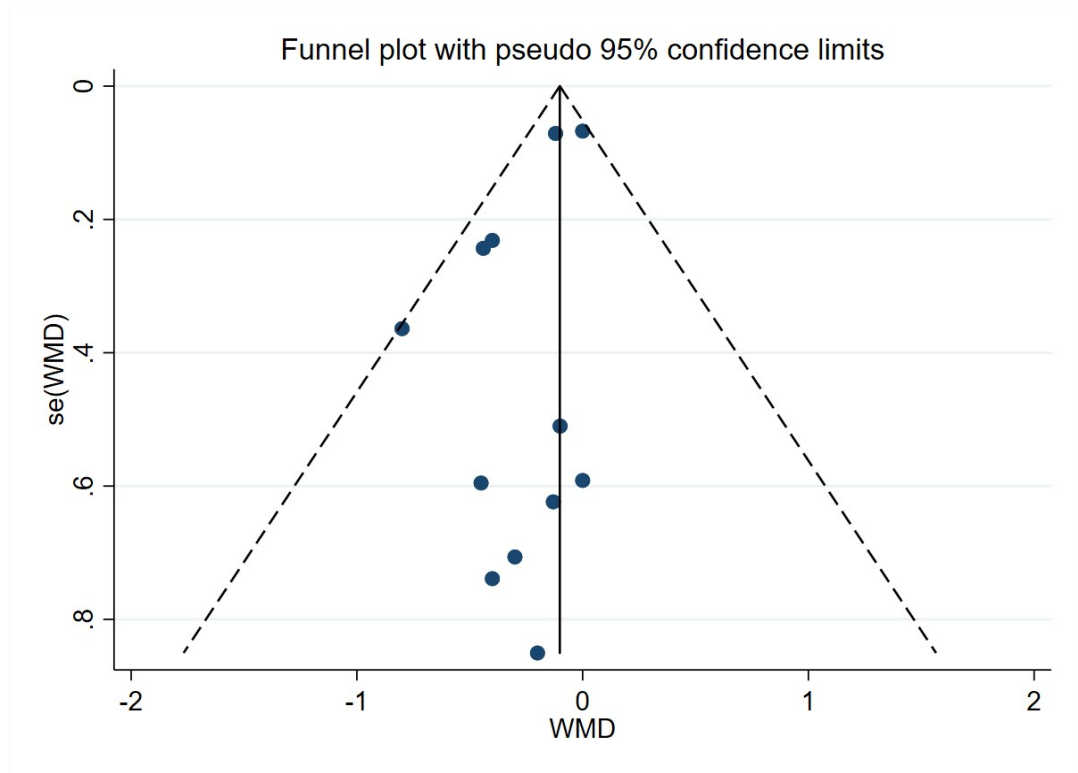

H

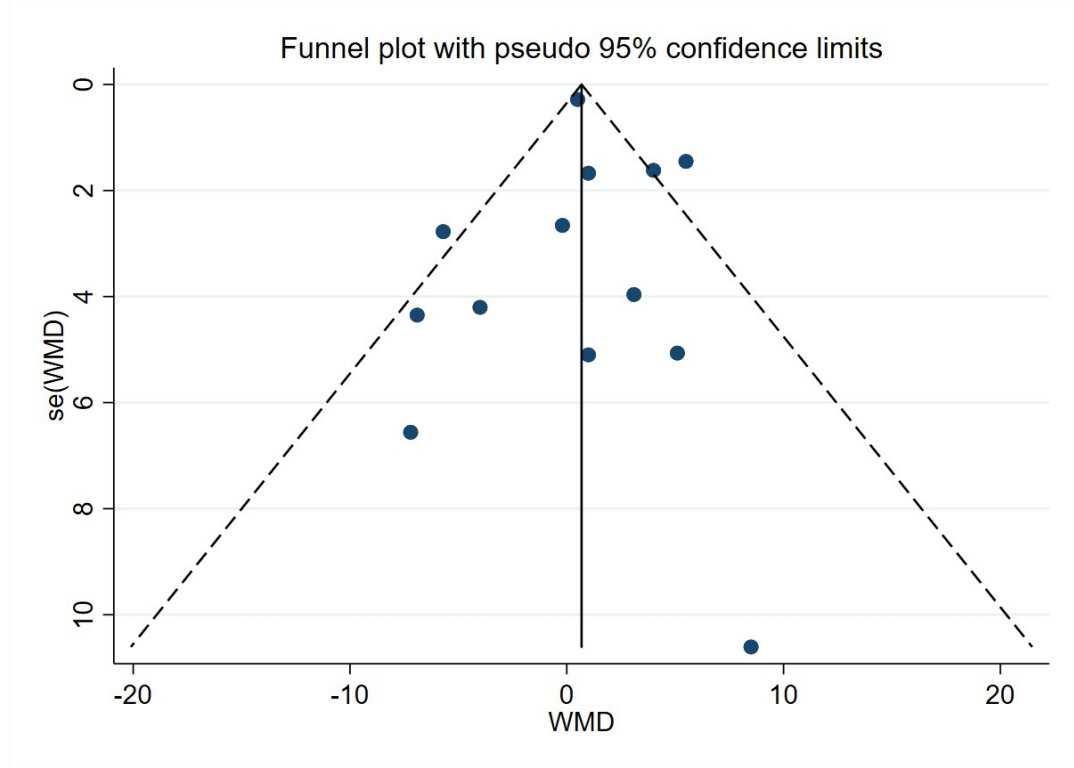



I

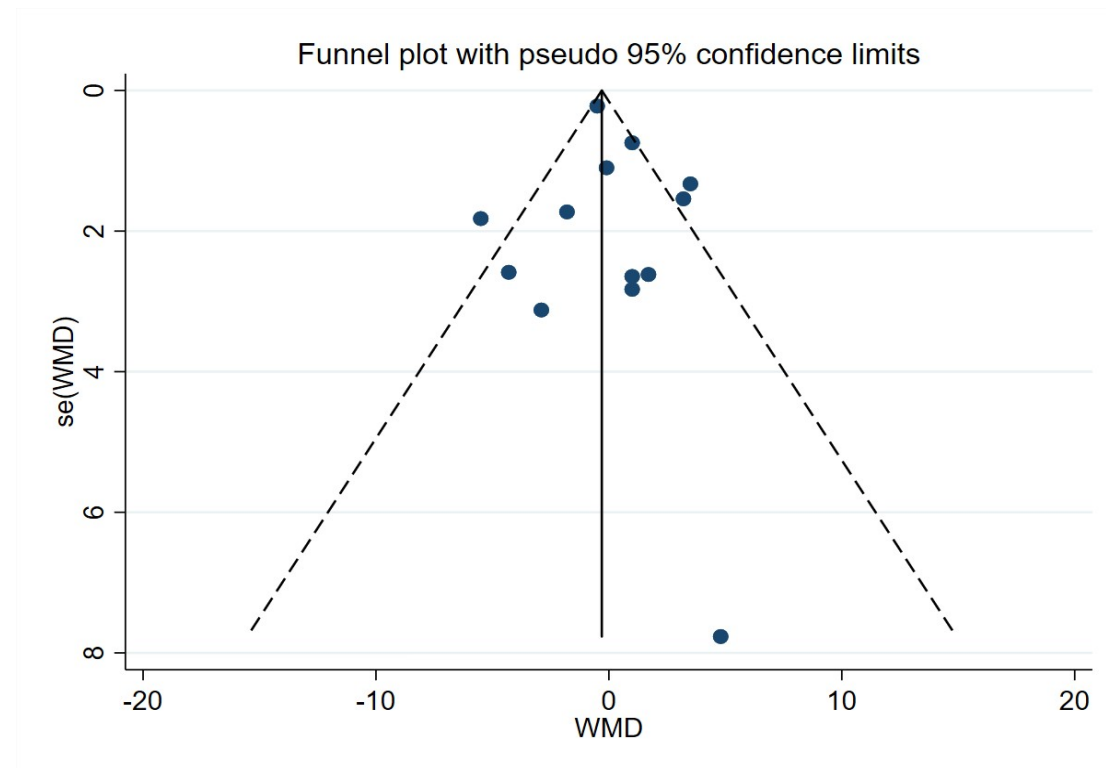

Figure S5. Funnel plots for the included randomized controlled trials.

A. TC: total cholesterol; B. TG: triglyceride; C. LDL-C: low-density lipoprotein-cholesterol; D. HDL-C: high-density lipoprotein-cholesterol; E. FBG: fasting blood glucose; F. HOMA-IR: homeostatic model assessment for insulin resistance; G. HbA1c: glycosylated hemoglobin; H. SBP: systolic blood pressure; I. DBP: diastolic blood pressure.

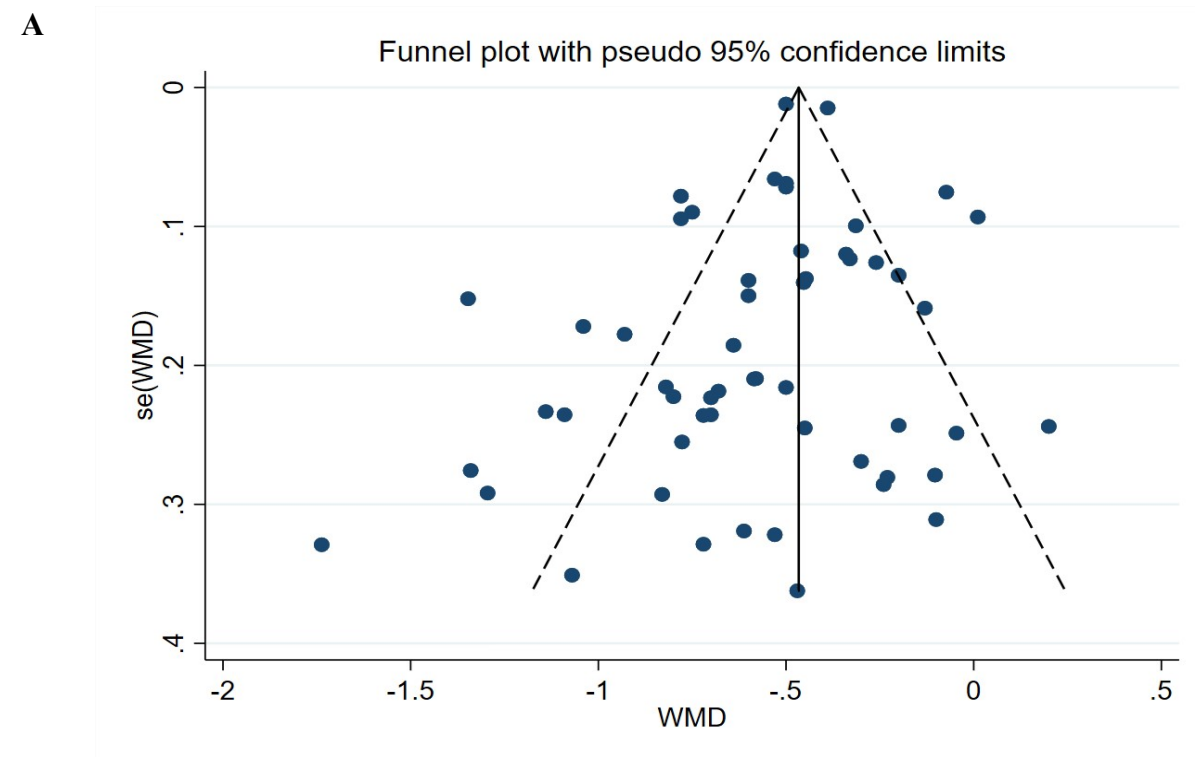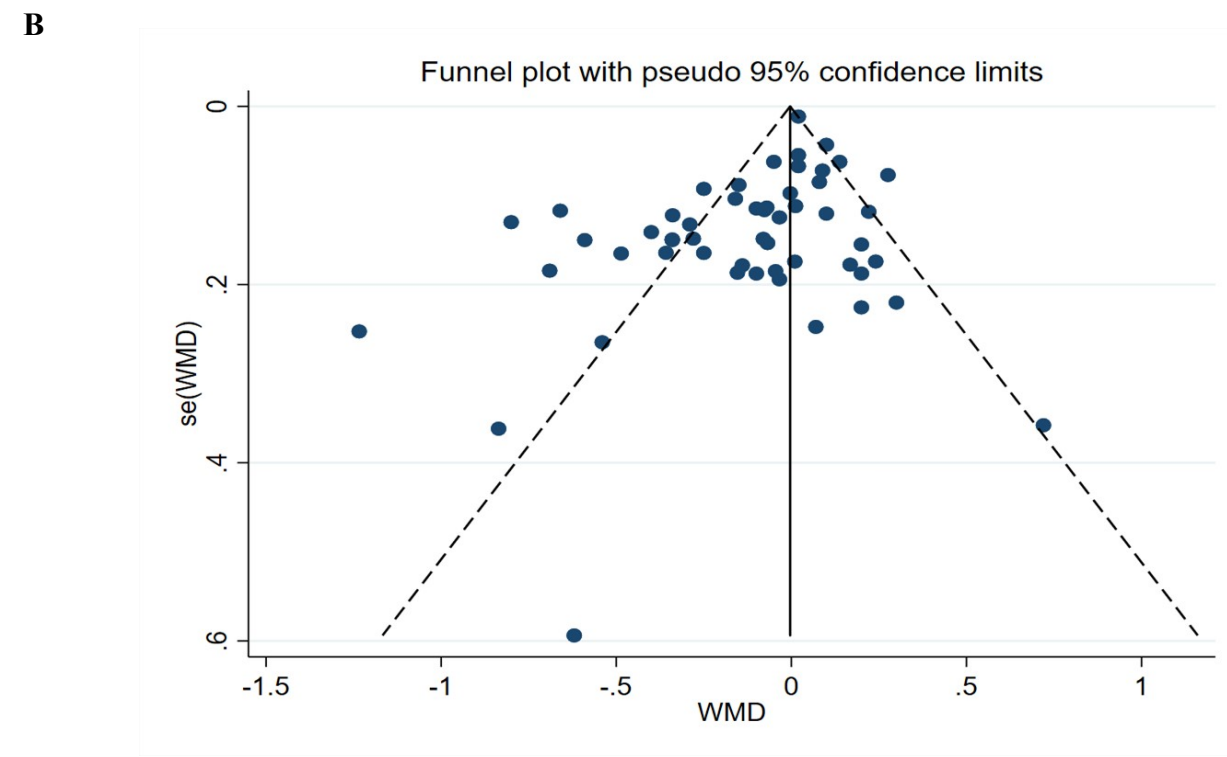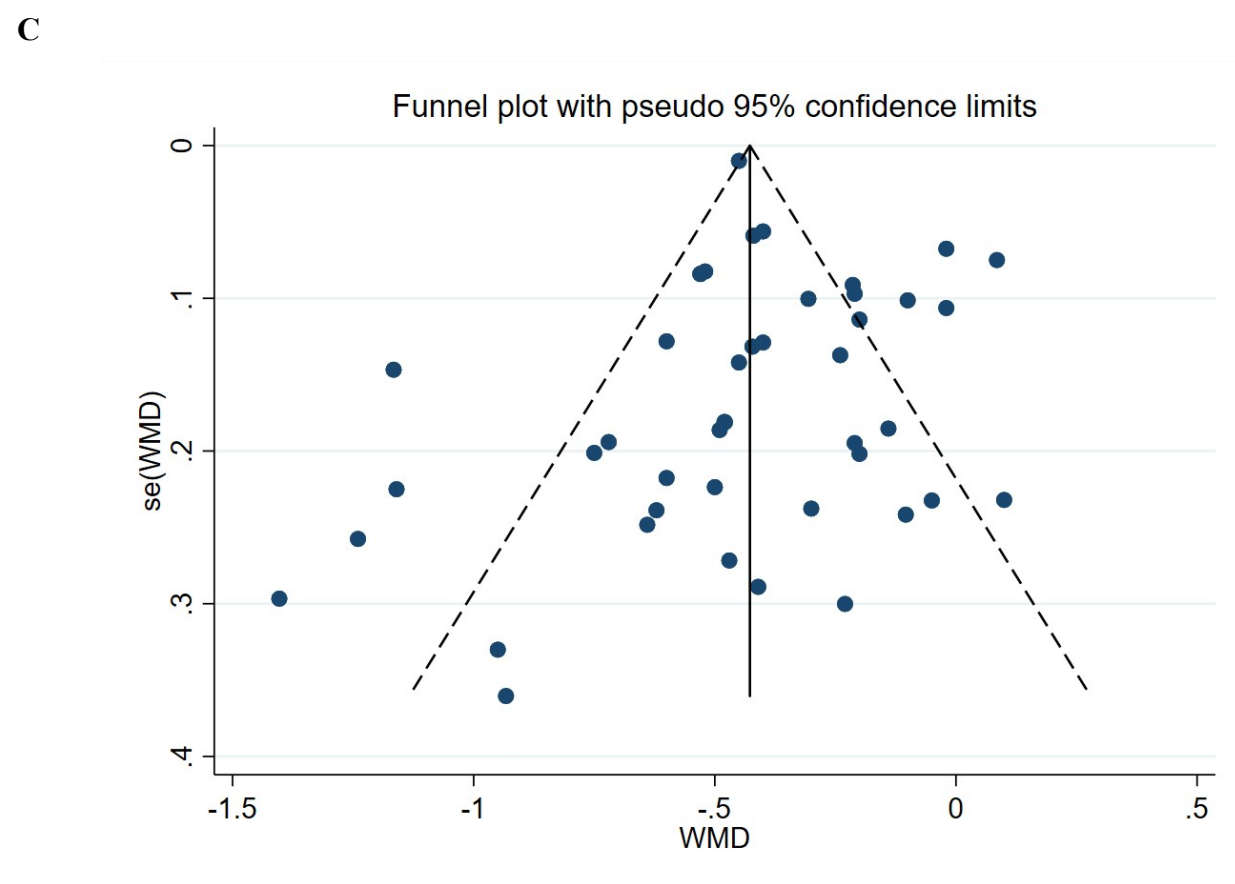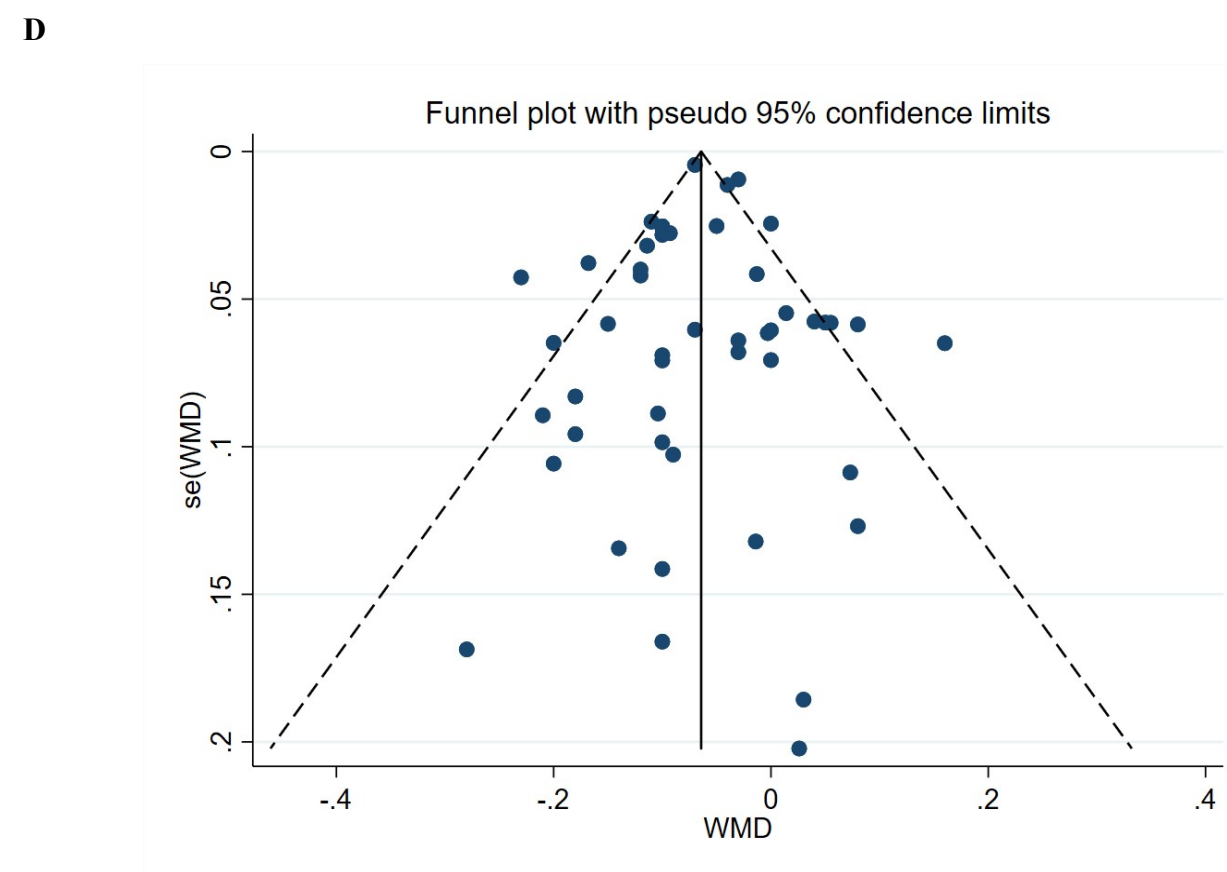

**E**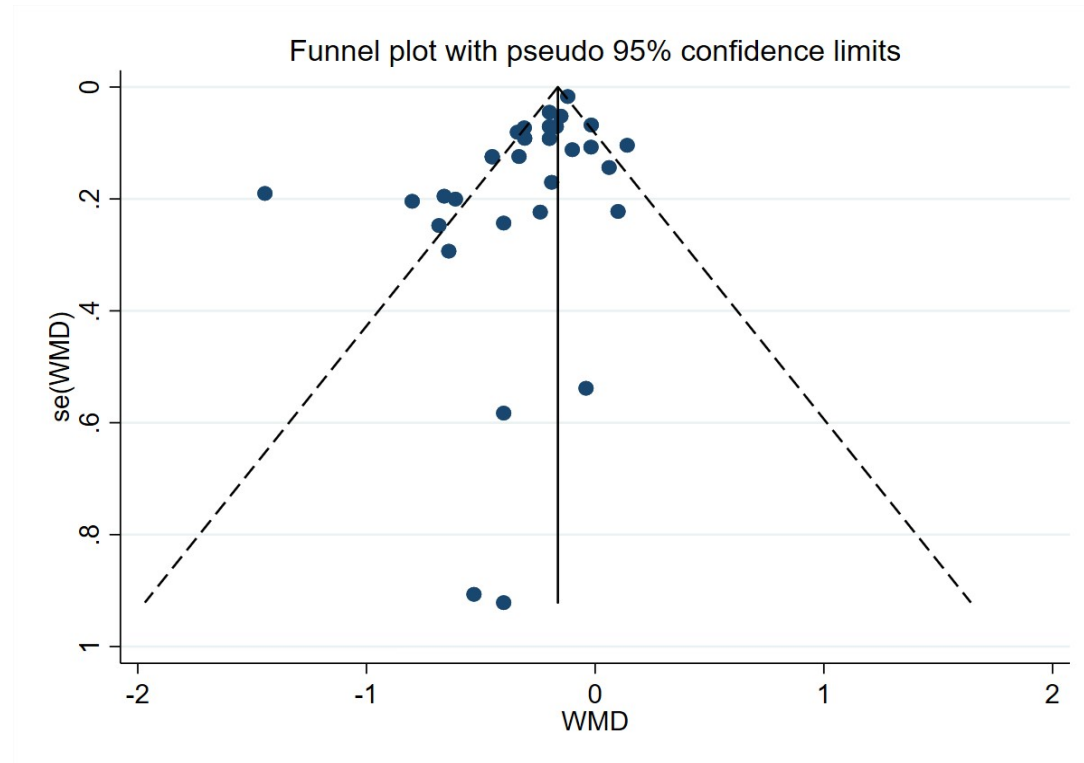**F**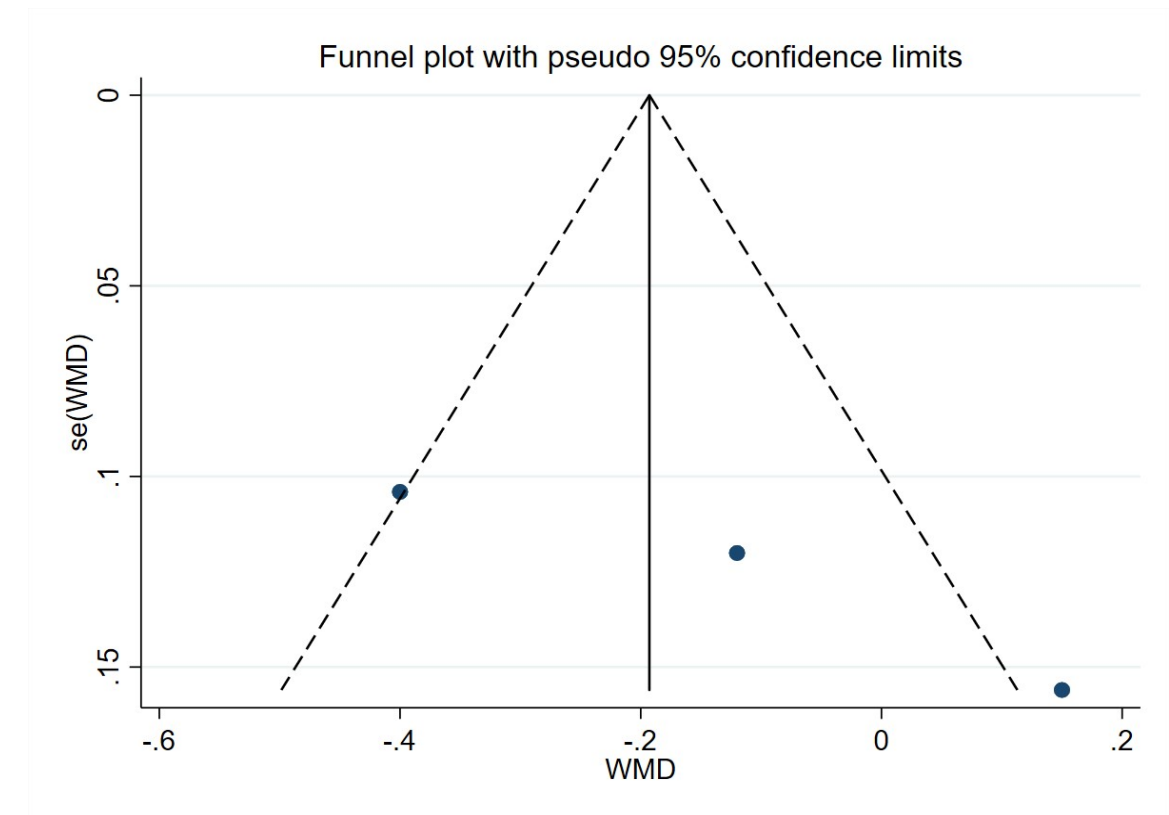**G**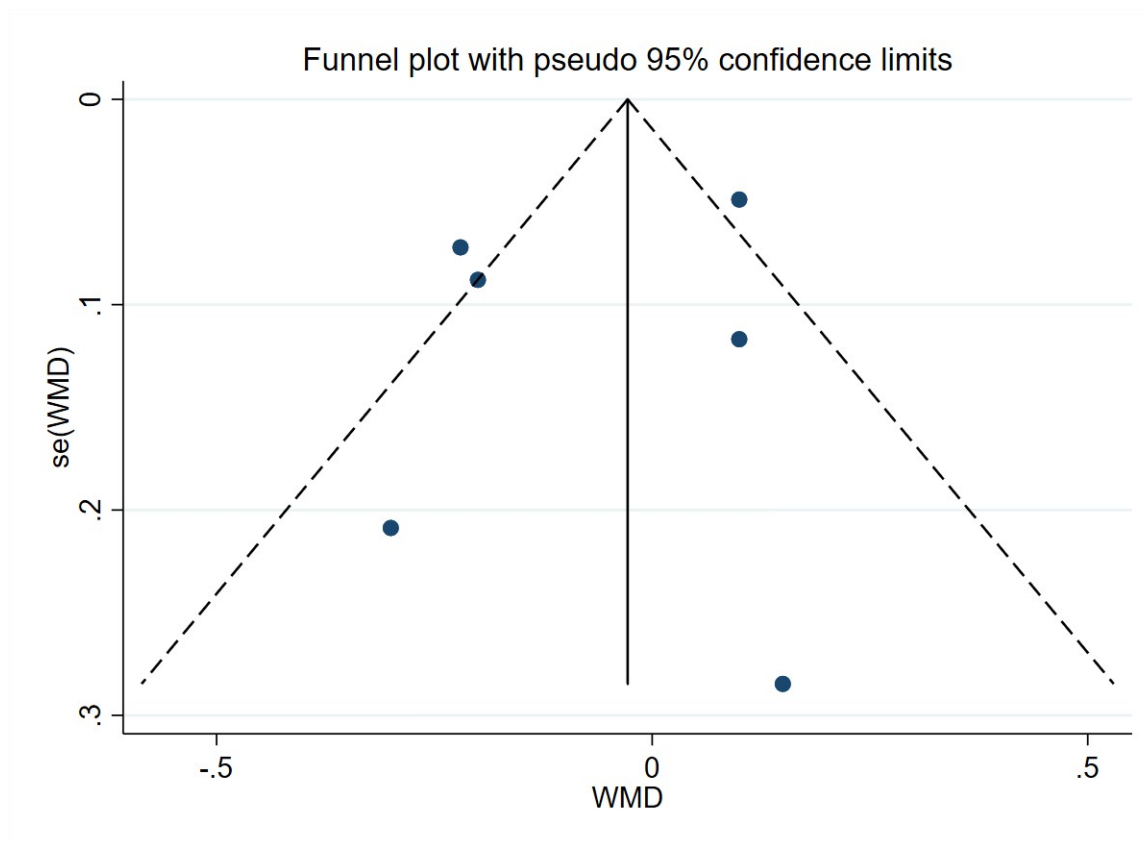**H**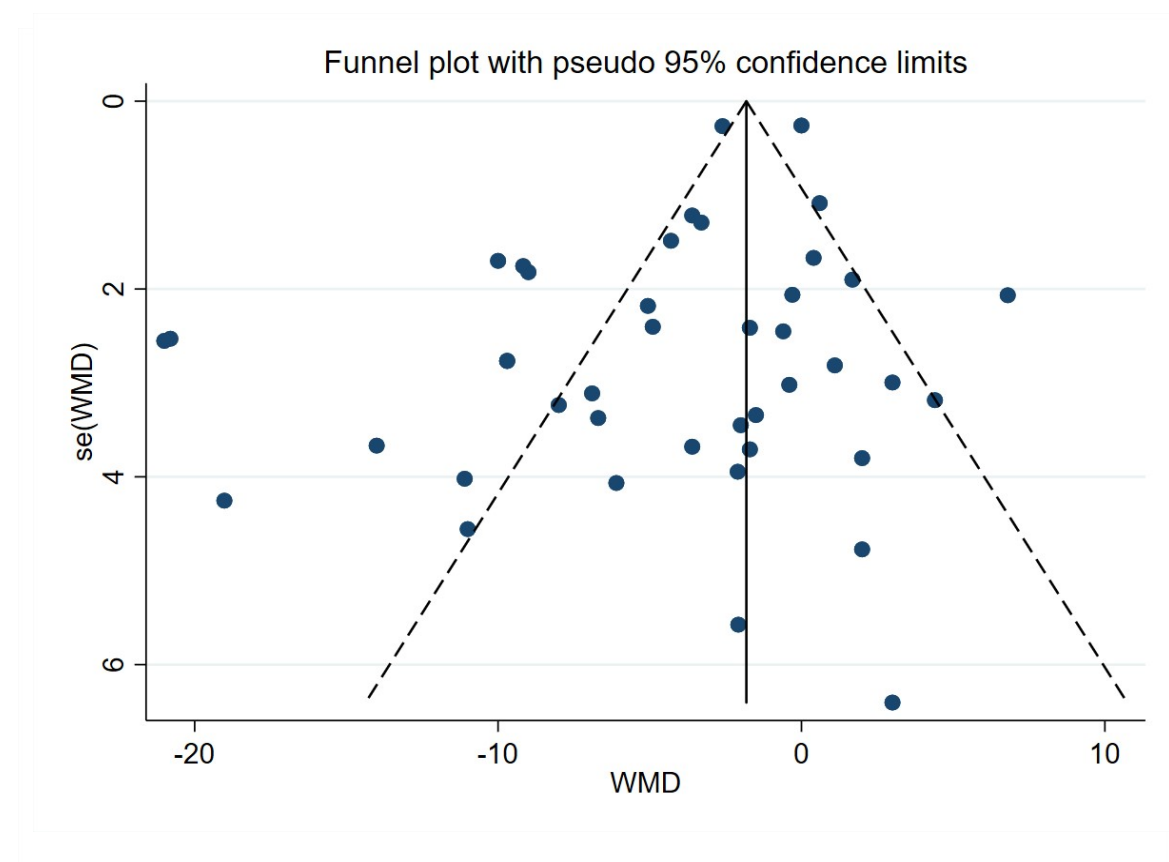

I

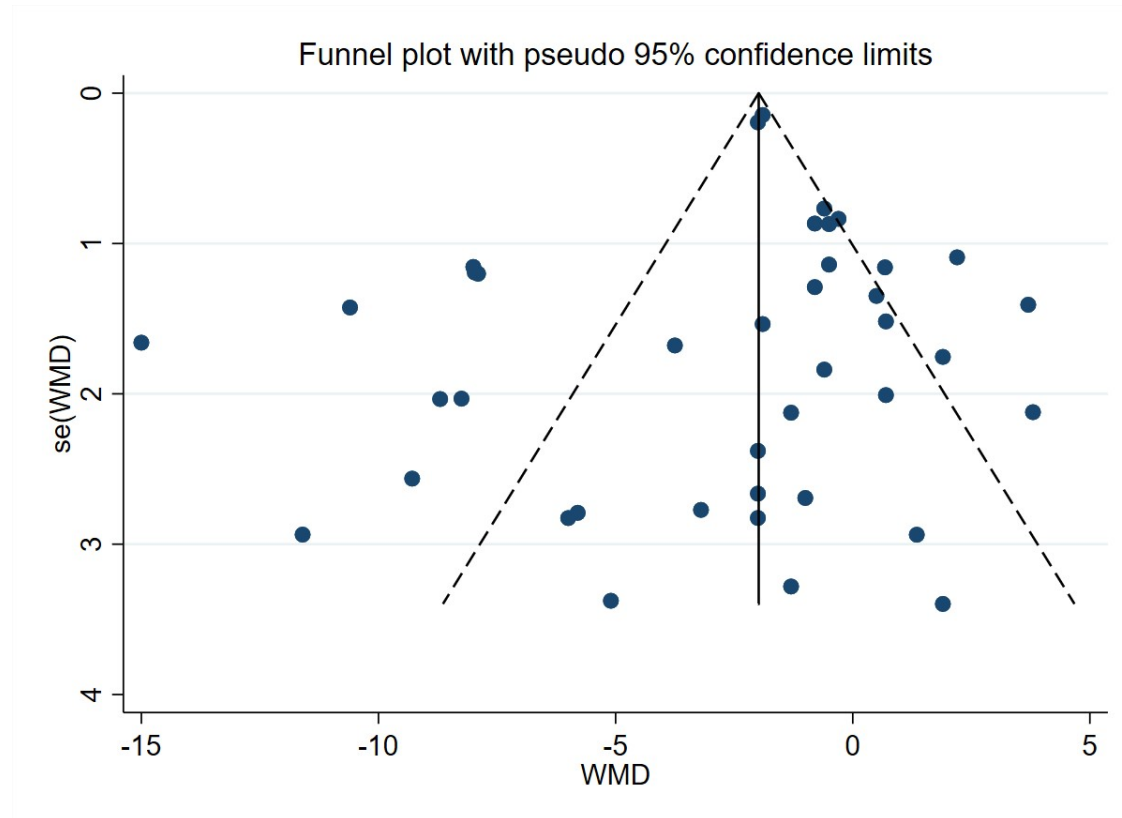

Figure S6. Funnel plots for the included observational studies.

A. TC: total cholesterol; B. TG: triglyceride; C. LDL-C: low-density lipoprotein-cholesterol; D. HDL-C: high-density lipoprotein-cholesterol; E. FBG: fasting blood glucose; F. HOMA-IR: homeostatic model assessment for insulin resistance; G. HbA1c: glycosylated hemoglobin; H. SBP: systolic blood pressure; I. DBP: diastolic blood pressure.
